# Supplementary material for: The Caenorhabditis elegans Tubby homolog dynamically modulates olfactory cilia membrane morphogenesis and phospholipid composition
Source: eLife. 2019 Jul 1;8:e48789. doi: 10.7554/eLife.48789 (PMC6624019; doi:10.7554/eLife.48789)
Supplement: Figure 1—source data 1. [file elife-48789-fig1-data1.xlsx]

## Sheet: Figure 1B
wild type	tub-1(nr2044)	tub-1(nr2004)	tub-1(nr2004) + [str-1p::tagRFP::TUB-1]	wild type L1	tub-1(nr2004) L1
13.49	3.41	2.89	11.52	3.72	5.25
12.06	2.73	1.11	14.05	5.22	3
10.61	4.56	2.24	10.89	3.54	6.38
16.8	2.17	3.01	12.91	4.34	3.58
11.92	4.19	5.66	11.48	3.7	4.49
10.06	2.88	4.73	12.02	4.55	5.28
12.18	3.39	3.38	13.54	6.23	5.17
15.08	1.34	3.91	12.56	6.18	3.19
13.41	2.03	1.42	15.69	5.52	4.82
12.01	1.36	3.14	9.86	7.64	3.42
12.96	3.24	6.06	8.54	4.95	4.76
11.4	3.86	2.84	12.93	5.47	4.16
14.85	1.78	2.72	9.08	2.7	4.16
10.67	1.69	3.47	8.65	4.18	6.64
11.39	1.47	3.3	12.99	4.84	6.23
13.9	1.51	7.32	11.5	6.88	4.57
13.64	1.36	6.87	8.62	6.81	4.42
16.1	2.41	4.25	18.39	5.49	6.24
19.3	2.07	5.23	13.01	3.54	3.41
11.14	3.51	6.83	9.93	3.57	3.93
11.14	2.7	3.8	8.91	4.88	5.18
12.22	2.29	4.68	7.83	5.68	5.21
10.72	1.65	4.63	12.01	3.83	3.29
9.78	1.33	2.88	12.41	6.47	3.92
17.29	1.45	3.78	14.49	5.78	5.45
8.36	3.92	4.41	9.7	6.02	4.94
12.58	2.58	5.97	13.32	3.11	4.44
10.7	2.27	5.29	16.83	6.25	3.52
13.39	3.29	5.63		6.34	4.75
11.1		4.85		4.45	5.21
				5.03

## Sheet: Figure 1E
ASK			ASH			ASI
wild type	tub-1(nr2004)		wild type	tub-1(nr2004)		wild type	tub-1(nr2004)
7.013	7.23		4.824	6.006		5.247	4.089
6.854	6.278		5.541	5.288		3.165	6.183
7.055	6.918		5.521	4.311		4.263	4.907
6.967	6.718		6.096	3.324		5.013	4.091
5.936	6.675		6.006	5.543		5.395	4.401
7.649	7.076		5.505	4.985		4.707	3.914
6.749	6.256		5.337	5.378		6.798	3.735
6.317	7.04		4.221	3.718		6.282	5.514
7.466	7.512		4.998	3.839		4.744	3.855
6.895	6.933		5.644	3.858		5.703	5.427
6.95	6.89		6.199	4.357		5.851	5.18
4.67	6.641		5.459	5.939		5.647	3.491
6.963	6.487		6.188	3.832		5.175	4.76
6.855	5.036		6.716	6.213		6.047	4.98
7.234	5.196		6.444	6.207		5.58	4.43
7.712	7.188		5.135	5.679		5.728	7.51
7.584	6.014		6.558	5.312		5.339	7.169
7.8	6.719		6.137	4.98		6.261	6.443
6.574	6.567		5.891	5.308		6.762	7.277
6.841	6.844		5.707	6.5		4.475	5.322
5.459	6.411		6.298	5.705		5.532	4.216
6.475	7.555		5.803	5.783		6.44	5.68
7.524	6.664		5.655	5.497		5.781	3.42
7.653	7.202		5.607	5.349		6.161	6.031
7.163	6.754		5.343	4.458		4.74	5.087
5.271	6.515		5.862	5.197		4.391	5.545
7.17	4.665		5.553	6.336		4.902	5.062
6.644	7.417		5.829	4.943		5.449	5.751
6.744	6.477		6.634	3.599		6.323	4.491
6.822	6.928		5.241	6.337		4.582	5.747
4.686	6.69		6.006	5.685		5.186	4.835
6.434	7.107		5.026	5.916		5.786	4.331
7.298	6.837		4.165	5.028		7.059	3.619
7.801	7.103		6.043	5.493		6.596	7.25
7.093	5.206		6.568	5.173		5.266	7.275
5.333	6.609		4.775	4.318		5.679	5.501
6.719	6.934		6.406	5.793		6.697	3.771
6.792	6.546		5.495	3.856		6.099	4.538
6.942	6.441		6.126	5.123		6.075	4.528
6.654	7.421		4.42	5.887		4.539	4.461
6.638	7.558		6.443	6.428		4.975	3.521
7.197	7.398		5.124	3.249		6.352	6.029
5.877	6.408		5.981	6.15		4.829	6.211
7.36	5.077		6.384	5.768		6.868	5.068
5.392	7.077		6.277	5.615		6.36	6.456
5.813	7.263		5.605	6.521		4.936	6.668
5.959	6.72		4.995	5.035		4.876	6.598
6.049	6.748		6.275	4.731		6.213	4.947
6.239	7.083		5.958	6.559		6.082	5.569
5.282			6.253	5.155		5.468	4.653
7.199			5.684	5.72		5.534	5.948
5.395			6.737	3.07		4.131	4.875
			3.908	3.551			4.823
			6.715	4.92			6.053
			5.118	5.277			4.617
			7.028	4.653			5.949
			6.909	6.017			6.423
							3.471
							5.221
							4.949
							4.376
							4.083
							4.971
							6.173
							4.523

## Sheet: Figure S1-1
wild type	tub-1	TULP1	TULP3
10.77	3.859	2.18	7.222
5.915	4.461	4.646	9.814
11.728	2.41	2.762	7.89
10.519	4.114	4.408	3.075
10.554	3.799	4.621	4.609
7.182	3.496	4.997	6.754
9.805	3.139	3.205	5.829
13.504	2.955	3.913	3.741
14.747	5.618	4.33	3.4
7.815	3.49	3.779	2.92
5.668	2.947	2.821	4.076
15.884	3.595	4.275	4.809
10.961	3.651	4.667	4.129
12.895	3.474	2.838	5.88
11.239	3.278	4.63	3.858
6.119	2.897	2.936	4.83
8.939	2.222	2.909	5.889
13.373	1.911	3.87	3.236
7.256	3.857	5.082	2.74
12.738	4.088	4.089	2.598
10.33	4.538	4.559	3.707
10.096	5.036	5.447	1.914
7.96	2.975	3.042	5.317
6.804	3.183	3.771	3.425
11.272	2.699	3.288	4.965
6.482		3.056	6.068
7.527
14.871
6.747
8.793
