# Supplementary material for: The Caenorhabditis elegans Tubby homolog dynamically modulates olfactory cilia membrane morphogenesis and phospholipid composition
Source: eLife. 2019 Jul 1;8:e48789. doi: 10.7554/eLife.48789 (PMC6624019; doi:10.7554/eLife.48789)
Supplement: Figure 3—source data 1. [file elife-48789-fig3-data1.xlsx]

## Sheet: Figure 3D
Length of enrichment			TUB-1 fluorescence in cilia
wt	kap-1(ok676)		wt	kap-1(ok676)
1.81	2.68		345.335	71.0823
1.31	3.06		69.0847	65.903
2.04	1.59		233.013	44.704
2.09	4.25		127.531	171.644
2.03	3.1		82.816	131.735
1.89	2.98		40.1577	59.3847
1.02	4.14		152.681	61.4723
1.45	4.26		116.197	142.065
2.78	1.21		49.161	60.5873
2.5	6.37		27.4827	112.603
2.38	5.53		109.989	115.313
2.38	4.05		73.37	142.226
1.81	3.82		267.377	113.922
1.19	5.07		-46.4167	101.282
2.18	5.74		449.972	163.724
2.11	4.58		218.482	175.903
2.24	4.12		86.7157	46.6917
1.9	1.25		787.613	50.888
2.3	3.75		272.288	13.4237
1.48	3		449.772	142.426
2.1	2.39		1121.21	23.235
1.4	5.9		1184.27	295.245
2.09	4.14		357.444	-2.25333
1.82	5.23		428.391	80.871
1.79	2.3		173.841	43.2363
1.78	3.01		244.487	18.903
1.13	3.96		1292.97	99.1823
1.97	5.98		98.156	339.283
2.28	4.43		194.938	149.248
2.09	5		625.044	378.358
	5.45			47.1553
	2.5			62.789
	2.71			33.7577
	1.86			113.344
	5.35			267.729
	5.65			999.667
	3.85			599.322
	4.98			198.412
	4.42			240.092
	4.48			61.4393
	1.11			2049.89
	3.87			363.079
	4.53			597.253
	2.43			566.689
	1.04			133.704

## Sheet: Figure 3E
	N-term	C-term	QRKR	KR	full length rescue
wt-like	12.5	0	11.1111	57.1429	96.4286
Type I	87.5	0	2.22222	42.8571	3.57143
Type II	0	100	86.6667	0	0

## Sheet: Figure 3F
wild type	tub-1(nr2004)	+ N-term	KR	+ C-term	QRKR
11.46	3.87	2.92	5.18	3.48	4.72
11.52	3.54	3.85	8.21	3.62	9.4
15.29	1.62	5.71	5.71	2.02	5.54
10.55	2.6	4.44	2.79	4.32	5.17
12.77	4.11	3.79	1.75	3.64	7.25
12.05	4.97	4.47	3.88	5.92	7.69
9.21	3.55	5.18	6.8	4.3	5.71
13.27	0.99	2.96	4.93	5.28	5.26
11.7	5.27	5.67	6.29	3.78	6.91
11.36	1.18	3.23	4.16	6.78	6.99
11.24	2.89	2.33	5.9	4.51	3.38
16.94	5.05	4.22	3.96	4.32	6.62
12.2	1.25	3.41	3.25	2.02	2.18
11.37	5.93	2.59	6.35	5.83	4.16
11.41	3.18	6.52	3.93	3.02	5.29
17.93	4.79	2.82	2.42	2.94	5.4
13.34	5.2	4.83	6.14	3.5	5.05
12.93	1.78	2.75	7.6	4.05	4.83
13.95	6.38	2.61	2.57	2.14	6.38
15.22	3.19	2.54	5.48	3.01	7.05
10.23	6.91	3.32	7.44		6.1
13.82	5.94	1.35	2.62		1.9
11.14	5.39	3.04	9.06		4.6
12.15	3.43	3.28	6.58		8.41
13.49			2.59		3
10.96			4.77		4.38
			5.39		6.61
			2.93		6.08
					5.67
					4.29
					7.16
					2.19
					4.83
					5.81
					2.42
					4.54
					5.73
					5.49
					4.58
					2.48
					5.35
					3.51
					2.29
					7.16
					6.37

## Sheet: Figure S3-1A
wild type	tub-1	daf-10
10.962	2.492	2.605
8.18	1.929	2.487
11.873	4.589	2.558
13.055	3.484	2.287
12.928	2.962	2.33
11.179	5.673	3.76
13.992	2.291	3.02
12.794	3.553	1.61
10.551	3.166	2.505
9.595	3.358	1.622
9.954	3.196	4.329
13.746	4.169	2.374
12.026	2.97	2.435
13.036	2.746	3.176
13.066	3.959	2.508
14.46	4.095	2.982
9.554	2.472	3.174
13.725	2.472	1.776
11.418	4.818	2.578
10.288	5.093	2.845
10.847	5.336
10.1	3.756
12.827	4.282
11.485	4.003
10.964	5.341
	3.554
	4.912
