# Supplementary material for: The Caenorhabditis elegans Tubby homolog dynamically modulates olfactory cilia membrane morphogenesis and phospholipid composition
Source: eLife. 2019 Jul 1;8:e48789. doi: 10.7554/eLife.48789 (PMC6624019; doi:10.7554/eLife.48789)
Supplement: Figure 4—source data 1. [file elife-48789-fig4-data1.xlsx]

## Sheet: Figure 4A
WT	odr-1	tub-1	tub-1; odr-1
2.181	2.484	1.034	1.032
1.29	3.1	0.975	0.931
0.924	1.489	1.102	0.882
1.142	2.826	1.161	0.856
1.132	1.864	0.927	1.057
1.051	4.111	0.982	0.826
1.331	1.106	0.893	0.834
1.701	2.667	0.975	1.094
1.427	0.942	1.117	1.253
1.472	1.386	1.228	0.807
1.983	3.162	1.016	0.889
2.013	0.846	1.299	0.891
1.186	0.963	0.889	1.524
1.572	1.904	0.58	1
1.467	1.993	1.191	0.854
1.787	3.511	1.189	0.779
2.812	2.266	1.057	0.887
1.208	2.509	0.926	1.253
1.284	1.838	1.117	0.704
1.685	2.595	1.089	0.817
1.323	2.328	0.904	1.192
1.365	2.816	0.682	1.158
2.1	3.254	1.299	0.926
1.069	3.737	1.03	0.951
1.675	2.719	1.051	0.714
2.641	4.457	0.998	1.152
2.405	3.503	1.147	0.795
1.812	3.936	1.043	1.141
2.199	2.038	1.121	1.144
2.354	4.366	1.141	0.737
1.352	1.574	0.999	0.602
3.309	1.532	0.521	0.927
2.304	2.925	0.698	1.185
1.637	2.131	1.102	0.861
2.916	3.369	0.989	0.818
1.259	1.032	0.758	1.145
2.873	4.015	1.05	0.897
2.151	2.033	0.997	1.676
1.324	1.055	0.912	1.198
0.885	4.242	0.939	0.804
1.304	2.786	0.903	0.842
1.581	3.141	0.988	0.888
0.874		1.274	1.039
1.056		1.054	0.478
2.069		0.778
1.63
2.013
1.214
1.598

## Sheet: Figure 4B
wild type	odr-1
0.141997	0.285541
0.150093	0.177285
0.10517	0.204462
0.197925	0.348735
0.292122	0.901906
0.205218	0.47982
0.311961	0.628499
0.232522	0.214636
0.231798	0.280294
0.176081	0.454727
0.149893	0.183417
0.108276	0.645434
0.0751989	0.265586
0.130192	0.215198
0.0905363	0.120843
0.117469	0.229643
0.157755	0.284735
0.146016	0.754247
0.213667	1.45333
0.190741	0.228181
0.120567	0.206984
0.299946	0.463112
0.214532	0.227273
0.285093	0.685557
0.138644	0.294234
0.138759	0.18319
0.0958957	0.221027
0.260807	0.241156
0.130454	0.780184
0.349712	0.352094
	0.372208
	0.421979
	0.420427

## Sheet: Figure 4D
time (sec)	Wildtype																odr-1
0	0	0	0	0	0	0	0	0	0	0	0	0	0	0			0	0	0	0	0	0	0	0	0	0	0	0	0	0	0	0
3	1.27647	13.0969	3.46302	10.4459	2.62556	10.2958	15.64	1.98411	11.1495	4.85382	12.4607	9.11352	3.7705	6.99847			10.9471	14.1383	12.3564	22.2004	11.734	17.0018	1.64061	21.4745	7.84279	16.9822	29.4335	11.0647	22.7472	12.3649	16.6642	10.0318
6	1.29864	22.4463	13.0939	19.6314	4.50269	18.3358	20.4075	4.74346	19.2927	5.07576	24.0808	24.3801	6.65908	3.27648			17.8439	26.0696	20.7652	35.886	21.1103	23.4477	3.11376	30.5075	14.8146	23.0612	53.0513	19.251	33.6798	23.3786	30.9573	17.6298
9	2.81682	33.8989	14.0725	33.8687	5.35542	25.1242	28.9042	7.86677	26.4791	12.8544	22.7722	26.9701	7.35458	10.7793			27.5731	33.0523	29.0686	41.9426	29.8206	27.9894	5.15201	41.9764	20.0679	27.5792	58.4653	28.5769	42.4237	29.6273	40.5767	21.8876
12	3.79337	38.0675	22.071	37.5496	5.64562	30.3667	27.6527	7.34943	31.034	12.8816	26.9125	31.0629	8.95461	17.6408			28.8951	42.1408	33.0376	49.0008	31.362	34.4685	4.69184	52.7505	26.7641	33.3535	76.0118	34.9891	48.4913	38.3971	45.9496	23.1335
15	3.97049	46.3858	25.9062	43.5317	8.82856	35.3937	36.4661	8.33541	35.9774	15.9195	32.4056	38.1135	9.48497	16.4528			34.4713	45.5199	36.1175	55.0063	38.2186	35.8957	7.88549	54.3604	30.5645	34.9298	72.2927	38.74	56.3022	40.4599	52.6327	28.0319
18	4.67872	52.3903	30.8941	43.7831	10.0307	40.5581	40.388	10.3824	37.2918	17.0705	37.8589	39.1918	12.3505	31.369			33.2087	50.8104	38.8567	55.404	40.5421	42.6417	6.686	52.8062	32.6851	41.3678	68.1831	39.7654	67.478	45.6637	54.1289	29.5362
21	3.84271	56.4886	28.9211	47.1748	11.7184	42.5871	44.3467	9.17353	41.3362	20.5522	45.4609	45.5086	12.9808	17.3535			39.2844	52.6355	45.0508	53.874	49.4214	43.684	8.89189	60.3229	35.354	36.0072	90.5556	43.8433	68.5835	44.4334	57.7436	33.9002
24	4.11962	57.018	34.5817	52.195	13.3659	41.3961	45.3796	11.7952	41.4364	21.4177	48.1497	46.5082	14.6217	36.6533			41.6518	57.3006	47.8938	57.9885	54.5191	42.0057	8.32661	61.0783	35.2923	42.1805	85.8099	46.7591	77.5416	49.2467	58.0427	35.291
27	5.47481	54.1807	38.1502	58.243	15.3729	50.9945	46.0495	13.0475	47.3057	23.2625	53.5021	45.9512	16.2532	37.264			38.9859	56.3383	51.7137	58.8998	58.5069	43.5195	8.84233	68.3755	41.0326	47.056	88.9521	51.5284	84.4369	50.0036	67.1928	39.5748
30	5.94687	55.8397	37.8159	52.7186	14.0423	46.3405	46.3825	15.2439	49.2052	24.4754	54.8625	56.9322	16.5789	42.104			42.7455	62.1673	51.3426	66.1755	60.9025	45.537	9.29043	67.0448	42.7227	49.6154	77.883	53.3381	90.0192	55.7598	65.0728	38.9461
33	5.79885	58.3436	45.1226	54.0189	16.803	44.288	45.358	15.3492	48.997	22.1338	58.6592	57.4221	19.0242	35.7915			48.3011	64.8372	54.4529	60.918	65.912	50.8509	10.3121	68.5559	46.6116	47.4386	89.0046	55.6919	95.4983	50.8446	62.8464	40.6272
36	6.01256	59.5373	45.0941	57.8872	20.4454	48.4172	49.1508	16.6526	56.4223	26.6783	54.2941	57.7469	20.1871	42.5537			49.4412	65.8374	55.1452	61.9547	66.3477	48.6001	11.8334	68.364	50.0367	50.7249	87.7537	56.3129	93.4627	54.5443	67.3518	38.5555
39	6.09489	66.0458	43.602	55.3996	20.4699	53.3203	49.1158	17.7704	57.1754	28.6667	56.0621	62.6444	22.052	46.9912			51.9537	68.007	56.4622	66.4701	65.9787	54.5883	12.8867	71.647	48.7098	52.277	80.0254	57.978	89.6404	55.4999	70.4445	45.0266
42	5.67522	73.1588	47.6555	58.3252	20.1752	49.4434	54.6534	17.1819	57.1245	26.4242	50.1026	58.8839	22.0147	40.66			52.9117	69.6458	60.4815	64.2454	72.6517	44.7073	11.7964	63.2423	52.5145	58.2811	79.1997	53.8801	91.3556	55.0776	73.4869	43.2851
45	7.51134	65.8235	39.2384	58.3914	19.5229	48.221	56.191	19.6309	57.8863	32.9355	47.6435	64.9404	21.5198	51.2481			50.9304	70.566	61.6018	64.7536	74.2563	52.0088	13.8726	69.9244	49.8128	58.5658	86.273	58.6181	93.44	56.465	71.7817	47.3004
48	6.84386	68.1195	42.6677	65.5823	20.6572	50.104	50.6461	18.0722	57.0454	21.2717	49.9084	57.7694	24.176	50.6235			54.739	73.5931	64.7204	63.3051	75.9352	49.4309	13.6018	68.7163	50.1665	58.2239	94.1843	61.4979	98.9944	58.0192	71.4103	45.7403
51	5.16297	63.34	46.5399	60.6595	21.3991	48.4994	52.2117	19.8608	68.78	30.3787	63.5506	63.63	25.2397	56.2745			56.7879	70.5728	65.2953	66.9177	80.1254	51.0846	14.009	71.4522	58.401	61.2666	88.6665	59.785	101.893	61.5118	74.0874	48.664
54	6.56916	68.9017	43.7222	59.2835	21.441	49.659	54.2337	20.0986	64.9475	28.1155	47.5753	63.2268	23.245	53.9048			54.6334	74.2904	65.9798	68.0865	79.8445	52.3262	14.5968	72.3094	56.792	61.2632	89.9296	57.8729	96.5957	61.0916	65.9523	52.4781
57	7.54959	73.1268	44.2041	55.7182	23.4901	52.7905	53.4024	20.806	60.4306	26.873	51.8585	66.4169	27.0648	55.7271			54.9413	70.0669	66.1846	69.6234	83.4778	56.5561	14.4049	68.2629	55.9012	57.4733	87.4112	62.7755	104.019	57.959	77.0018	49.058
60	7.17095	68.177	46.1255	66.051	21.98	48.5692	52.8184	22.7823	66.6806	28.4868	50.15	59.6575	26.0433	61.9872			56.2738	81.3009	63.4983	71.2714	88.6008	51.9292	15.8141	71.4571	52.3518	58.7299	82.7191	62.0542	105.693	59.4655	75.5585	51.5602
63	8.32434	66.1873	45.3198	62.689	24.7487	45.9161	53.9384	21.8073	70.827	32.4751	47.1121	60.2136	28.7421	59.5304			55.7129	72.4733	68.3064	70.9133	87.4243	52.4754	15.6339	72.0754	59.2012	63.0418	88.0271	57.7574	97.7272	58.3863	79.9629	50.8592
66	9.32251	66.2929	40.7896	63.3761	19.9598	49.1006	53.5779	21.6212	61.2381	31.8332	56.4112	61.3681	29.2759	65.3778			55.2527	76.9288	69.4206	70.723	88.8606	56.0087	17.2647	70.1084	56.2998	63.1013	85.1393	62.1093	96.4362	63.8282	68.8376	58.3492
69	8.08928	68.5079	48.5972	67.2346	21.2757	49.1054	51.8189	20.1706	68.6494	30.9001	58.0046	60.5329	29.5007	72.3708			58.8324	75.1445	70.4478	68.9777	88.9844	58.9125	15.552	76.7801	59.4932	62.8604	80.1638	62.2696	103.834	60.0754	75.3821	55.3741
72	10.1264	67.4892	48.7174	71.252	20.609	47.1906	60.8996	21.9212	70.0412	28.1791	56.1575	69.6663	31.9908	69.942			57.7938	81.7152	68.6364	67.8108	96.4347	57.0886	16.3679	78.3491	59.2189	62.0458	83.7981	61.5235	98.9463	60.2961	75.4885	56.5684
75	8.58878	70.8665	46.9817	69.4722	22.3154	47.6198	57.3713	22.9635	73.4089	29.8184	54.6051	68.0952	30.4178	71.5794			58.5024	82.4759	68.5173	70.6592	92.7519	51.6627	16.6694	75.7597	57.7927	58.5248	82.2906	64.9322	109.966	63.3359	77.3577	57.9519
78	8.91143	68.2084	50.063	69.5494	26.1336	47.1008	53.7668	24.6773	66.9741	35.23	55.1266	68.0558	33.6523	65.5459			57.3594	79.3122	69.4891	69.7712	99.8542	50.5727	14.8595	79.5816	59.812	56.871	82.2683	62.0633	91.4264	64.155	74.9305	58.5407
81	9.52985	75.6264	46.0664	64.4577	22.6796	47.6461	51.6039	24.8416	64.9888	34.7424	55.0191	65.9541	33.6684	63.3652			58.3388	81.2235	72.6584	72.0283	97.6093	55.1584	17.2596	71.7428	60.3266	58.7186	76.6623	62.4542	100.545	65.3898	70.9433	57.0132
84	9.31059	70.4951	48.8303	63.6696	21.8958	52.148	57.2969	24.4484	70.9191	28.3284	55.9982	67.7688	32.1963	71.4325			61.834	72.9382	70.2138	68.3649	101.676	53.8869	15.7408	70.8392	62.1263	57.5472	94.4331	65.7891	101.838	67.3926	75.1128	54.1776
87	10.436	66.2938	52.0982	57.3836	23.9199	51.8792	49.2478	24.5225	69.9761	35.4346	62.1853	72.2993	33.1182	74.5724			60.0846	78.7455	72.7717	72.6212	97.8825	51.5625	17.7324	75.0829	59.2732	58.4864	91.3768	66.6455	88.0573	66.4091	74.3885	57.0768
90	8.72461	73.7638	50.372	56.1401	24.5486	52.7181	52.0127	24.8463	70.7981	31.2986	61.4668	77.1801	33.1183	73.2432			60.2489	74.4135	73.7375	70.3459	100.721	50.8149	18.6105	74.4056	58.508	58.2379	89.0012	67.7468	99.4447	65.8597	72.6248	58.4376
93	10.1868	66.9752	48.205	56.2121	23.1261	45.3552	54.993	26.3043	72.0957	26.7286	60.7244	68.9357	32.6534	73.655			61.1746	77.0016	71.1401	78.0003	94.6937	52.6509	18.3699	73.1536	61.1592	60.1369	82.6811	67.6421	103.034	68.0044	75.5303	60.3406
96	9.3153	69.9675	54.3053	57.4733	24.1523	53.4495	48.8274	26.0394	70.0616	30.5643	62.2693	65.5868	32.8326	81.044			60.7875	76.5549	78.5897	76.9212	94.942	53.8137	18.771	74.5934	60.9017	58.7147	82.1779	70.0225	111.172	65.1902	74.5382	59.1015
99	8.81553	73.0339	51.2557	57.6087	25.5374	47.6782	61.8884	25.4372	68.814	27.6601	59.1108	75.2565	35.3444	75.0459			63.7407	78.2407	76.0553	71.6505	90.8683	52.9319	17.8498	75.1692	62.2165	60.9471	81.187	67.0285	95.79	66.8074	73.1569	57.4982
102	9.45002	70.4248	51.7766	64.1973	24.8084	49.0879	56.1613	23.2768	68.246	36.5138	59.7507	76.7574	34.6693	76.5824			59.3419	81.2588	78.232	77.7964	94.0847	52.2559	19.6719	72.7443	62.6729	63.331	68.9943	64.3107	105.75	72.2927	74.2631	58.0245
105	9.57531	82.1058	53.5355	58.4517	25.7836	48.4905	53.3956	25.4426	71.6984	31.0098	53.459	80.0678	38.7056	79.33			68.836	82.9504	76.5212	79.2076	97.8384	53.9794	19.2622	73.4679	68.5555	62.4297	74.4875	68.8434	103.576	69.3998	74.1795	59.6429
108	9.16506	75.3033	51.126	63.5707	24.1128	51.2919	51.8272	25.1207	66.2562	29.283	66.0184	75.8993	37.6694	88.108			64.7401	80.3552	75.446	76.8609	100.587	52.2862	18.1964	68.2152	61.7912	58.2932	86.4292	65.1867	97.7544	70.4036	77.0931	56.1525
111	8.70908	74.9832	45.7385	61.7133	24.6735	47.7902	51.4701	26.7217	66.4437	27.2451	62.7411	86.3099	38.5537	85.4699			63.946	77.2593	80.7599	77.22	99.7526	48.0154	19.2383	74.8759	60.695	63.8723	66.593	63.5147	105.427	74.7009	77.0529	59.9805
114	9.17976	74.9843	45.8819	65.6497	24.3514	45.897	54.109	24.3299	64.2101	32.905	58.3717	78.5773	41.7626	76.9224			63.974	78.2529	81.3706	77.994	102.974	50.3904	19.1874	71.1877	63.1413	63.9297	66.6845	64.2734	93.6259	76.6606	81.1655	58.9353
117	8.44936	75.8819	51.6332	67.7321	24.697	42.1468	52.3601	24.7994	68.2608	34.1261	65.3966	80.7827	41.9105	77.7142			62.2659	73.1912	79.6804	80.326	104.18	50.6148	19.9221	71.3241	63.4196	63.1402	66.6231	66.6667	95.3061	76.1643	81.1384	56.0527
120	8.37756	65.3261	48.0141	64.1257	24.5444	49.8517	50.8311	24.1704	68.4185	30.0305	69.9193	81.1108	39.7584	77.735			61.4972	78.8956	78.0044	78.8637	99.2334	50.1251	21.2045	71.7916	69.451	62.2926	73.7556	65.7504	95.1795	74.1163	79.576	58.0938
123	9.09161	67.3482	44.7873	62.1407	24.3906	46.3068	52.1105	23.2275	69.8973	28.2277	69.5489	82.5259	40.8128	79.6766			64.9057	77.2941	75.8779	85.9012	101.289	51.0021	19.5677	75.5321	70.9802	66.6671	70.5955	65.076	96.1073	70.38	82.4981	56.3608
126	8.84685	72.7791	44.1124	66.0307	24.3557	49.8742	53.5216	23.4601	73.2741	31.5412	68.135	77.6214	40.7737	78.0745			68.8734	80.2794	78.1648	82.1375	97.0455	48.9187	19.1496	68.0095	59.2706	66.1137	79.6193	65.9906	106.064	67.5258	88.3179	63.5047
129	9.07969	64.345	47.0724	69.3028	24.9081	45.8786	50.8162	20.871	61.0106	36.0163	60.5984	83.5315	45.4444	82.1305			67.8568	78.9282	77.0663	81.1217	99.5802	51.5956	22.5434	72.1411	64.0459	67.069	75.7529	66.8101	105.344	75.1674	80.2616	61.8573
132	10.0604	70.079	40.4311	67.0535	20.6999	44.0283	51.4837	23.5204	60.5826	33.169	59.7469	82.3319	43.7591	86.2716			66.841	79.5038	77.1023	80.2704	95.8717	52.0881	21.7094	69.056	69.4083	73.5553	76.0207	65.7682	106.246	78.8685	81.2096	60.8534
135	8.93028	73.787	43.0389	63.1084	23.0133	48.8724	50.3193	22.7111	63.0977	38.7794	63.9641	81.2302	35.5654	84.441			69.172	81.8589	79.166	82.8152	97.7031	47.4745	20.0282	71.6504	64.7853	64.3636	76.8096	64.2482	95.8403	79.2249	86.377	63.6339
138	9.71668	69.4797	45.1964	65.7745	22.1799	44.0423	49.0425	23.1208	58.7514	31.5849	56.7439	80.1291	44.9106	77.0568			64.4722	77.0173	80.4275	85.1972	95.5172	52.7326	20.973	71.1624	73.0332	67.0901	77.0506	70.4099	93.6642	73.3511	79.7965	64.5361
141	9.25626	72.0303	46.0611	60.0138	22.4912	36.7625	39.4036	24.3477	66.3134	34.0601	60.6453	80.8932	45.6696	82.0003			70.5821	77.5882	80.1245	71.3905	94.7228	49.395	22.7169	71.9682	69.8492		80.8545	66.3862	101.75	66.9785	87.8505	61.7311
144	8.85211	64.3903	46.4555	69.7652	21.0947	38.6277	46.9457	23.1355	60.4306	34.7102	64.1152	76.8138	44.6659	76.4502			69.1186	82.2233	79.0369	80.4821	91.6505	45.8443	21.7175	81.7001	74.1133		79.4653	66.6363	107.111	67.104	85.1365	65.1838
147	9.27511	71.5217	49.0791	68.5246	21.9919	40.2752	48.2089	22.4661	65.5757	33.4091	67.9009	73.9238	48.056	78.2751			74.398		79.0274	82.7615	89.7206	50.1789	21.8276	74.6133	75.3841		86.8465	65.3357	98.5299	70.2172	85.732	64.077
150	10.3875	73.6574	44.8959	67.203	20.8858	40.4111	44.1853	23.2094	67.8445	32.5362	62.6986	83.8521	47.3229	87.9502			73.3416		80.0854	88.9464	96.0442	52.1184	22.7187	73.2833	72.2593		83.7032	66.6146	96.6377	75.4754	85.6121	66.2507
153	10.444	68.1388	47.3287	71.8385	22.2909		43.216	22.0391	61.3396		56.3037	75.699	44.2877	82.5679					79.995			50.5307	20.5761	73.0528	69.8052		85.0556	66.2768	94.5157		89.0236	60.7874
156	8.78947		44.7293	75.5044			49.4187	20.2275	65.4104		71.1401	74.8338	44.1405	75.5746					82.2487			46.8902	23.4094	70.3332				67.2917	105.911		87.7313
159	9.68535		41.2251	71.8946							63.1715	80.0978		89.7512					81.9253			48.9171	21.9867	74.5354							86.7512
162				72.6215							54.7654												23.1578	72.1291							85.4376

## Sheet: Figure 4E
wildtype	odr-1
9.734	66.68
70.83	78.9
47.64	79.45
64.9	77.29
23.94	100.4
47.74	51.68
52.08	23.81
24.47	72.81
67.64	67.93
32.39	63.39
60.75	81.74
79.22	65.86
57.57	101
88.53	71.17
	79.83
	62.37

## Sheet: Figure S4-1
wild type	daf-10	odr-1	daf-10; odr-1
1.16	1.3	0.93	0.9
0.95	1.05	3.46	0.57
1.34	1.23	2.15	0.86
1.19	1.45	1.85	1.1
1.96	0.98	2.75	0.7
1.14	0.98	2.8	0.85
0.93	1.3	4.58	0.72
1.72	1.11	2.02	0.83
1.01	1.44	2.33	1.13
2.51	1.14	3.71	0.77
1.82	0.96	3.22	0.84
1.09	1.17	2.88	0.95
1.51	0.95	1.09	0.92
2.11	1.33	1.12	0.9
1.73	1.11	1.82	0.85
1.49	1.32	3	0.79
1.11	1.27	2.52	0.93
1.98	1.09	2.11	0.64
1.34	1.23	2.04	0.55
2.42	0.78	1.86	0.74
1.78	1.06	3.34	0.85
2.1	1	2.07	0.81
1.71	0.68	2.3	0.88
2	0.89	1.8	1.06
1.72	0.53	1.59	0.6
1.45	0.6	2.35	0.95
1.15	0.77	2.66	1.01
1.65	0.78	3.13	1.07
2.17	0.68	1.71	0.9
2	1.07	2.23	1.12
1.55	0.74	1.26	0.77
1.24	0.52	1.2	1
1.95	0.65	1.08	0.87
1.62	1.73	3.28
1.15	0.81	2.33
2.06	0.58	1.64
1.75	0.82	2.99
1.16	1.34	2.22
2.41	0.67	0.76
2.25	0.72
1.4	1.04
	0.96
	1.06
	1.01
	0.77
