# Supplementary material for: The Caenorhabditis elegans Tubby homolog dynamically modulates olfactory cilia membrane morphogenesis and phospholipid composition
Source: eLife. 2019 Jul 1;8:e48789. doi: 10.7554/eLife.48789 (PMC6624019; doi:10.7554/eLife.48789)
Supplement: Figure 5—source data 1. [file elife-48789-fig5-data1.xlsx]

## Sheet: Figure 5B
wildtype	inpp-1		wildtype	odr-1
0.0454566	0.80545		0.0264096	1.17308
0.036015	0.613141		0.0302304	0.494911
0.00794898	0.672416		0.0157717	0.648774
0.049554	0.545623		0.0459541	2.07366
0.0506725	0.257277		0.0201324	1.64142
0.0176701	0.359732		0.051707	0.201603
0.00920712	0.412589		0.0286272	0.859089
0.0261073	0.391339		0.0213366	0.447647
0.0173032	0.333816		0.0293176	0.264009
0.0229973	0.233434		0.152967	0.175675
0.0168422	0.490243		0.0150441	1.93614
0.0222071	0.379402		0.0309877	0.841623
0.0112656	0.320864		0.0606984	4.21734
0.00330304	0.245338		0.0182057	0.950965
0.027756	0.448247		0.0958248	1.64511
0.0373217	0.59999		0.049242	0.843578
0.0057014	0.275158		0.0134022	0.194354
0.128732	0.254658		0.10102	1.24181
0.0404462	0.341444		0.0484858	0.137209
0.0404439	0.173735		0.0307967	0.0443882
0.212623	0.301953		0.031372	0.191385
0.0377321	0.525691		0.0355601	0.753245
-0.0053953	0.40648		0.0282476	2.21147
0.0148806	0.265158		0.0253919	3.0691
0.0319207	0.288923		0.0338121	0.802919
0.00722002	0.19531		0.0231052	1.55521
0.0282522	0.256396		0.0116391	1.17752
0.027189	0.276383		0.105781	1.02552
0.0173587	0.229799		0.17188	2.77346
0.0260054	0.15613		0.0502178	1.72303
0.0172576	0.123819		0.0685398
0.0372912	0.226025		0.0191261
	0.318187		0.103759
	0.26571		0.0546926
	0.091832		0.0126406
	0.228837		0.0474965
	0.217752		0.0341437
	0.205226
	0.202312
	0.305821
	0.326018
	0.258282
	0.392431

## Sheet: Figure 5E
wildtype	odr-1
0.0169285	0.0293089
0.00336232	0.121605
0.0100605	-0.0060671
-0.0092534	0.030353
0.0268389	0.0251354
0.0135917	0.0908545
0.0562925	0.185207
-0.0057453	0.312984
-0.0063662	0.0078849
0.0134905	0.0292924
-0.0007233	0.0225804
0.00235427	0.0369821
0.0178893	-0.187732
-0.0015154	-0.0159201
0.0165477	0.0358006
0.00463091	0.0725566
0.0063361	0.460845
-0.0148338	0.00023372
0.034064	0.0286289
0.00986917	0.0452509
0.0323229	0.164439
0.00274815	0.0590382
-0.0183291	0.327482
0.0162726	1.51747
-0.0002356	0.0217271
0.00919876	0.099444
0.0446885	-0.0103908
0.0277566	0.0487322
-0.0094384	0.0999195
0.00208038	0.0147764
-0.0110929
0.00516055
0.0190831
-0.034044

## Sheet: Figure S5-1B
WT	odr-1		WT	tub-1
10.6667	78.3333		34.3333	133.667
57.3333	51		122.152	97.6667
16.6667	28		46.737	40
78	70.3333		105.759	86.3333
63.3333	70		85.3333	122.333
79.6667	141.333		63.6667	45.6667
53.3333	29.3333		27.6667	131.333
22	62		86.6667	12
20	10.3333		142.333	28.3333
124.667	16.3333		10.6667	80.6667
81.6667	190.333		81	68
88.3333	107.333		293.333	77.3333
85.3333	141		70	65.3333
38.3333	187		33	121.333
189	110.667		51.3333	15.6667
185.333	56		84.6667	230
396	101		98.3333	82
194.333	446		197.667	256
221.667	145		68.6667	195.667
152.333	52.3333		196.333	162.333
33	55		141.667	69.6667
122.333	69.3333		74.6667	262.667
433	145		34	27
120.667	229		85	93.6667
48.6667	20.6667		77.6667	144.333
28.6667	37.3333		51.3333	75.6667
95	111.667		182.333	13
18.6667	59.3333		95	414
50.6667	472		30.3333	96.3333
4.33333	40		108	95.3333
	8.33333		84	104.333
	23.6667		91.3333	79.3333
	6.66667		123.333	148.667
	102.333		69.3333
	7
	34.6667
