# Supplementary material for: The Caenorhabditis elegans Tubby homolog dynamically modulates olfactory cilia membrane morphogenesis and phospholipid composition
Source: eLife. 2019 Jul 1;8:e48789. doi: 10.7554/eLife.48789 (PMC6624019; doi:10.7554/eLife.48789)
Supplement: Figure 6—source data 1. [file elife-48789-fig6-data1.xlsx]

## Sheet: Figure 6B
Distance from cilia base	wildtype																																								odr-1
0	83.4042	12.398	9.07325	9.26692	16.2187	27.8102	45.3757	27.3809	19.2547	29.7652	20.001	37.5864	15.6103	23.3553	25.6168	9.42858	10.4158	18.7648	35.9367	10.5918	14.2789	35.9367	10.5918	14.2789	8.46728	9.94811	14.9904	10.6847	9.84248	14.3967	6.32894	13.5636	13.5636	13.9598	19.8922	7.86057	17.7433	17.7934			8.77632	30.9811	13.8678	24.3992	41.0115	28.0701	27.5564	55.0225	84.9054
0.1333	76.5789	18.6366	12.4732	11.5575	31.2765	41.5146	66.1408	30.7805	20.4685	33.4115	21.2235	37.0044	19.1659	22.4199	34.7371	11.4771	12.3247	19.6733	39.7662	18.021	14.7602	39.7662	18.021	14.7602	9.63976	10.7141	15.3037	12.0475	10.5287	17.1475	7.78975	14.6115	14.6115	15.0988	20.7733	9.57935	25.4481	18.9577			10.8144	43.5847	13.7584	26.2456	71.2864	33.9204	29.1285	60.1033	99.4045
0.2667	76.1719	24.6789	15.3559	13.3978	34.9842	39.281	69.2799	37.4507	24.0987	36.3548	23.1617	35.8475	24.0618	23.2932	28.9538	14.775	14.8367	23.1164	39.9935	24.9735	17.1667	39.9935	24.9735	17.1667	11.1655	10.7001	18.5674	13.6125	11.9702	21.2807	10.641	20.0143	20.0143	18.613	19.3855	11.1966	42.843	21.0934			13.3871	58.2005	17.205	30.6073	89.861	42.5201	32.7944	60.3658	100
0.4	68.4744	28.2828	18.9773	14.2317	33.4986	40.7692	87.4085	47.3604	26.774	36.0279	23.6622	38.4437	33.2805	26.2145	31.6656	19.5739	19.3619	27.0325	37.3251	30.9378	18.0491	37.3251	30.9378	18.0491	10.669	10.8861	18.5808	14.5771	13.4416	21.0867	13.2168	22.1536	22.1536	21.1178	18.9481	12.7455	61.5539	22.3192			21.5763	65.7458	21.9656	37.1045	84.0416	52.049	41.3432	71.6201	83.0418
0.5333	81.1532	27.7643	17.3343	14.9509	33.6026	40.6132	100	64.2999	27.0589	36.0688	23.7284	41.4875	49.1558	26.6786	31.6111	20.1568	33.2553	30.0464	38.8199	33.8118	15.8832	38.8199	33.8118	15.8832	11.1925	13.2971	18.7726	14.6876	14.3582	23.7462	22.284	26.1572	26.1572	23.0943	21.6227	13.3924	72.7684	21.7912			32.3396	61.5391	27.3122	43.4175	79.937	56.9574	40.1558	75.9918	73.1143
0.6667	89.3033	25.5304	19.2476	17.0937	34.9971	45.1757	87.6353	61.6221	26.203	49.1883	26.3876	40.6119	67.0893	27.9186	37.7655	23.2723	57.354	44.3658	48.2006	35.6025	20.661	48.2006	35.6025	20.661	12.341	21.921	21.0405	15.9682	14.5043	28.6955	38.564	24.1955	24.1955	21.9308	21.6883	14.4869	83.6397	22.4164			42.5415	59.6514	29.2951	41.76	82.7868	47.0847	41.7201	72.6184	67.9068
0.8	88.3508	22.6289	18.6346	18.1366	35.7552	52.7723	85.1003	63.0384	29.6782	66.4588	24.6138	49.1608	70.2649	30.2748	53.4626	31.5474	62.9614	70.3353	64.8887	41.7766	25.1586	64.8887	41.7766	25.1586	11.0354	28.9592	22.2677	13.3322	13.4012	24.8639	57.8957	25.8904	25.8904	22.3881	20.2459	24.3701	85.7994	24.8903			48.2059	69.1889	28.5553	38.2181	79.1552	42.1646	51.1339	77.9347	72.4635
0.9333	87.0069	28.9203	18.7243	17.1093	42.032	68.1161	85.2991	60.1748	34.8421	86.6639	26.344	54.9664	59.7774	38.4267	66.9067	52.9389	59.5796	82.7515	85.0615	61.742	31.1418	85.0615	61.742	31.1418	19.0176	35.9223	25.274	15.4388	12.5391	22.4837	73.0104	26.6964	26.6964	20.9505	20.6618	46.2993	84.8136	30.6692			46.4028	71.0357	25.9482	42.1994	77.3242	45.3162	58.181	70.4582	71.7958
1.0667	89.2636	44.9589	20.6274	19.7013	55.9069	79.1538	83.4818	63.5238	38.829	78.2045	31.7186	63.8192	56.62	50.9149	72.3019	78.385	62.2721	84.6111	100	74.7247	57.5958	100	74.7247	57.5958	35.1682	40.3531	40.8258	15.6425	12.1223	22.2082	87.5694	27.0432	27.0432	20.3992	20.9148	75.8527	76.1029	31.7993			51.0321	73.914	25.4281	38.5526	91.7432	49.6348	63.3136	63.0206	66.2553
1.2	84.3195	59.7706	19.4748	21.44	65.9061	82.0333	91.3268	68.2041	48.4506	72.8178	45.0987	72.1458	57.8542	52.499	84.705	85.9424	63.8786	100	93.5471	77.7671	66.4004	93.5471	77.7671	66.4004	52.0085	42.2048	60.6603	14.8473	13.1882	26.9937	100	41.0864	41.0864	19.2291	22.8603	94.3584	72.8593	36.5761			47.4117	62.2037	26.2024	36.92	100	54.1534	68.5185	60.9136	63.9941
1.3333	100	68.4588	19.7141	31.0679	73.1888	83.1681	86.3212	68.4351	53.5978	70.9487	54.1503	70.1988	60.1429	49.6936	91.0124	100	62.2433	94.0736	94.8535	73.4728	83.2542	94.8535	73.4728	83.2542	53.9359	44.9233	75.952	14.3148	13.4407	45.1206	99.2018	54.7642	54.7642	32.7603	25.1547	96.786	73.148	47.1516			46.1302	57.2851	24.4097	43.6819	87.5233	40.3684	67.8224	67.4874	60.4164
1.4667	86.3065	77.893	20.9903	45.7291	71.5844	84.4346	85.2716	65.2601	63.3355	75.2435	62.3123	73.2073	60.9072	52.8625	89.7848	98.145	65.761	91.1701	87.0697	73.0707	81.388	87.0697	73.0707	81.388	55.2128	48.6011	90.8709	15.723	18.952	51.0916	97.4419	64.9417	64.9417	38.4688	28.0191	85.3846	78.4904	61.4054			45.6626	59.2139	25.5857	48.9783	71.1168	37.6367	78.4658	66.0184	68.0815
1.6	88.8164	84.1914	24.359	59.9356	66.9523	80.3402	82.2555	59.5425	75.2162	63.5595	69.1812	73.6813	67.4283	52.9796	90.3671	90.3468	70.1782	91.491	78.3402	71.3024	86.8757	78.3402	71.3024	86.8757	59.2766	45.9271	96.8624	18.7513	27.4535	50.6581	94.7683	67.8276	67.8276	39.788	39.7328	83.0838	78.5769	68.1035			43.7832	58.0806	25.1501	54.5493	71.3278	37.0039	77.0266	59.2015	72.199
1.7333	87.1249	98.7512	29.2708	64.5044	65.2131	82.8293	74.5048	57.7122	83.0752	65.2447	75.2269	71.7212	66.678	56.1815	87.2408	92.4043	80.6795	87.98	73.0572	69.1603	75.5664	73.0572	69.1603	75.5664	62.0125	47.4443	96.3244	24.7108	35.8162	57.6797	91.3383	71.7724	71.7724	56.99	50.132	78.3367	79.1614	74.5426			48.1896	60.4805	26.6594	63.9016	67.1341	41.7376	73.7403	58.7958	71.2093
1.8667	78.5746	90.4375	38.9031	59.8039	61.3033	82.7544	75.9109	64.9942	76.0097	63.2653	86.3634	66.6731	59.0294	60.7705	81.2098	90.0282	79.6188	84.1089	72.0398	68.6156	83.7834	72.0398	68.6156	83.7834	64.4817	47.5126	89.352	28.8153	41.825	62.3668	91.8201	70.3312	70.3312	68.7332	59.1034	77.8366	79.7636	78.21			49.984	63.1853	28.8468	70.9795	60.1731	46.4548	81.1342	75.2763	79.9857
2	77.0951	89.7538	56.4166	55.9015	61.2433	79.731	80.8064	73.293	78.8948	59.4197	86.8726	75.2412	62.8178	68.7461	80.9728	81.7985	79.046	86.7912	67.8417	74.5692	87.8944	67.8417	74.5692	87.8944	67.9122	50.9333	86.7641	30.2613	47.5266	63.5486	87.5321	70.2219	70.2219	100	64.934	77.8478	81.3922	78.6589			57.7389	70.723	35.6436	70.0177	61.7511	50.4251	76.4528	86.4153	81.785
2.1333	67.6809	82.9904	66.0671	55.0618	63.3315	87.6692	78.2428	74.5706	79.8899	52.9612	84.9177	81.1985	62.1325	81.7184	80.8089	79.9791	77.1638	84.3543	69.6633	77.9757	100	69.6633	77.9757	100	70.4874	55.1767	88.3991	34.9199	50.1986	62.8671	81.7859	77.2088	77.2088	97.3585	63.8522	73.1775	90.2172	76.2483			63.9642	59.7093	43.6118	70.4599	65.7333	57.3716	74.3152	76.9815	82.5139
2.2667	71.2316	77.612	71.712	55.6809	69.7761	92.1696	72.5517	76.0415	71.8557	57.4939	89.55	78.079	64.3114	91.1302	88.1773	83.1033	72.0992	72.8671	76.824	79.3512	96.8914	76.824	79.3512	96.8914	72.2427	59.6356	93.9365	38.3483	61.9509	65.3017	71.0995	79.6289	79.6289	96.5648	65.8995	72.912	97.1737	79.8335			68.2763	60.923	52.3725	79.3461	76.4855	71.7117	72.0692	69.0477	59.5689
2.4	69.4633	72.5575	72.7839	59.3884	69.0451	81.2771	81.4559	77.726	66.5182	64.779	80.0738	74.7776	66.1528	98.183	86.8915	87.7839	73.9681	70.7316	85.3798	83.0516	85.4576	85.3798	83.0516	85.4576	83.2492	57.8188	92.0789	43.8105	66.9168	67.2555	69.6601	82.6109	82.6109	96.5597	74.9668	69.478	100	75.6047			73.3173	55.4783	61.072	73.2642	80.1757	84.7837	78.7682	55.9276	44.0932
2.5333	66.9303	76.5007	75.309	57.8407	74.5843	82.504	92.1519	75.0674	70.975	69.5804	78.227	75.0116	70.8298	90.3473	83.1637	82.8534	77.2433	72.0676	95.3919	84.3215	77.6407	95.3919	84.3215	77.6407	86.0658	62.3222	87.967	48.9702	72.9999	58.7743	64.8277	85.5705	85.5705	98.9511	74.0392	67.0251	95.532	93.1252			85.7496	59.3146	66.4066	62.6315	88.019	89.8935	83.0278	51.1941	31.9046
2.6667	69.1556	77.4921	78.205	55.0557	73.6374	83.1032	84.1319	76.2897	68.3719	72.3959	75.8672	78.5118	70.6627	86.3051	77.9698	77.598	83.0987	70.9139	93.0273	81.0962	98.2542	93.0273	81.0962	98.2542	86.4375	64.5112	96.0465	55.68	79.9923	57.3216	60.3598	87.0291	87.0291	89.4612	70.692	66.0819	89.6996	91.7347			99.0391	64.5434	71.7948	58.0683	96.1653	72.1736	70.5318	45.9864	22.4058
2.8	66.2907	86.3109	85.7611	64.258	72.0188	76.6756	79.2656	72.1377	71.1002	68.5852	83.0224	80.3401	74.9591	80.563	90.6794	75.2522	82.0614	76.5856	96.744	85.0289	88.4546	96.744	85.0289	88.4546	92.2374	65.4659	95.0244	63.9738	87.008	56.1702	54.8586	87.3006	87.3006	81.1261	72.1082	66.0328	81.9422	88.7156			98.244	70.0374	83.9322	64.5588	92.0774	67.3559	100	47.0444	24.5736
2.9333	63.855	100	82.0754	70.245	68.925	83.2158	81.6588	69.1864	80.0446	69.7001	88.9981	80.7541	67.9282	85.4597	90.0089	80.2512	90.4966	76.4851	81.2133	88.0712	83.1089	81.2133	88.0712	83.1089	85.6561	67.1394	99.1465	71.557	85.2849	55.8085	58.0282	87.8182	87.8182	83.0863	74.6586	64.8023	71.6084	81.9303			100	72.7848	88.5256	63.7712	97.2172	70.2625	79.2259	49.4513	25.4458
3.0667	64.9673	102.256	83.1651	78.8436	70.0336	80.1304	98.0847	75.5444	78.0875	68.7075	80.5851	100	66.0113	87.9622	73.6788	83.6525	84.2019	69.4421	80.7014	89.2747	76.5528	80.7014	89.2747	76.5528	85.6074	65.4552	98.2753	79.8992	88.3132	49.5737	56.424	80.6946	80.6946	77.3469	71.4888	67.8639	71.5741	77.595			91.6289	76.128	83.3587	74.5702	96.5934	71.2089	75.0709	58.3035	23.6184
3.2	67.0014	107.162	83.2834	76.7032	69.946	78.3705	83.2593	84.2434	80.3146	65.9089	87.6469	72.1015	58.9408	92.4366	77.9355	84.9467	83.171	61.0746	75.5728	93.8863	71.437	75.5728	93.8863	71.437	85.1737	68.1344	100	74.1309	95.5584	51.3938	53.0782	77.6173	77.6173	89.5937	64.4629	73.2451	75.0186	81.1258			93.615	78.8108	82.3273	66.1174	73.2907	75.437	71.0834	68.0383	21.019
3.3333	59.8401	106.947	80.9852	75.4862	70.0956	79.6794	74.0932	86.4372	77.3132	72.0821	89.679	78.7236	51.4497	86.8502	77.0271	81.8931	70.0643	70.0842	67.6376	92.5511	68.6592	67.6376	92.5511	68.6592	82.2669	66.5703	96.7661	78.0389	100	56.9891	48.2757	72.6274	72.6274	82.2157	57.2684	73.9018	79.3139	100			83.415	84.5977	85.2213	58.7133	56.7121	72.7243	63.8696	61.1222	23.9622
3.4667	55.7171	94.8646	86.9471	76.5468	69.4305	76.0653	82.5027	83.9175	89.3148	70.1428	87.4539	81.2909	51.0437	99.105	80.1968	83.2071	64.4751	74.5645	69.781	94.5453	66.8984	69.781	94.5453	66.8984	76.3726	66.4533	97.5662	74.4539	90.051	63.3386	42.7797	66.9076	66.9076	87.2325	53.991	78.854	77.5026	92.2567			79.751	95.6911	82.0556	67.5908	48.1739	87.3714	61.0375	73.5165	22.7597
3.6	60.3723	88.0794	90.1859	74.1711	73.5007	75.0477	86.3034	88.1382	78.0444	71.7823	80.6983	70.8597	51.5106	100	72.7697	70.0452	58.3533	71.6414	76.0016	100	65.1031	76.0016	100	65.1031	77.2785	64.7927	97.4044	71.7391	86.7471	65.6745	44.7057	66.5648	66.5648	82.7549	66.8912	71.7198	72.0266	93.8483			75.8129	100	81.4705	60.1744	39.944	89.12	52.2963	72.8473	22.0447
3.7333	63.9509	81.2056	82.4493	69.8171	75.9275	79.0533	82.1613	90.7995	80.4105	69.5583	79.6193	73.1466	48.2059	84.5476	69.6401	64.4082	53.5939	63.7451	69.3136	96.84	70.2673	69.3136	96.84	70.2673	76.3735	70.8358	98.2406	73.2185	83.9201	64.5566	48.7269	68.1899	68.1899	85.9455	66.7487	74.0506	63.3889	95.8364			64.6602	94.8464	86.1303	66.1815	30.945	68.7073	57.1887	71.2171	26.3881
3.8667	68.2776	73.3786	85.9259	65.3133	77.7087	78.4905	69.9201	90.7321	75.5093	68.0837	83.4223	72.2927	52.3101	75.6861	67.8119	60.3073	54.4329	71.3637	67.5641	93.4373	78.434	67.5641	93.4373	78.434	75.158	69.4084	91.4903	76.6364	85.8093	64.1026	54.7322	62.1198	62.1198	89.3279	55.8609	72.4828	60.7358	85.3962			65.3689	79.8194	87.4258	64.3204	27.6248	76.9325	58.3451	83.439	26.6439
4	67.147	71.4708	97.7136	65.282	80.3083	77.312	66.3831	100	78.975	65.8184	77.0055	76.8349	45.762	76.2228	68.5566	50.6102	55.0014	65.1295	62.3937	87.9703	75.0354	62.3937	87.9703	75.0354	84.5306	65.5402	84.4321	75.9509	81.5668	62.8628	58.8361	67.4641	67.4641	88.5417	54.3487	70.9842	59.7958	83.8398			64.8196	73.551	80.5703	100	27.2678	79.1997	55.7196	92.7975	27.5817
4.1333	70.0126	74.4546	99.5019	59.5573	81.6941	80.7027	63.6631	94.3433	79.437	63.2582	78.5081	72.4647	39.268	75.9327	65.745	56.6831	49.8123	61.3539	53.5325	87.9973	73.108	53.5325	87.9973	73.108	93.4906	65.7792	82.9734	77.5524	91.1813	60.4628	50.7678	66.8036	66.8036	93.0067	55.1019	72.9946	60.8427	80.3499			70.7352	66.1916	88.0499	81.4472	34.3066	73.4596	46.1976	76.9037	32.003
4.2667	65.7225	73.4968	97.4802	57.9403	84.2806	79.9306	72.838	95.894	73.2618	70.1639	80.6368	82.0482	39.0673	70.1003	65.2546	62.7499	55.5889	62.7169	34.5515	93.9274	74.0029	34.5515	93.9274	74.0029	97.9984	77.0043	85.6179	77.204	90.43	51.1415	48.568	65.3656	65.3656	92.3327	59.4058	73.4994	60.0152	77.2565			73.944	61.1352	90.1877	60.3158	40.1837	83.8232	46.3839	66.4874	34.7892
4.4	68.6604	77.7014	93.3905	48.5754	79.3019	72.6729	58.1617	84.7481	71.115	74.7041	82.7718	78.1516	37.8611	64.6632	65.1356	68.6381	66.9132	54.6983	21.1012	96.7055	73.7236	21.1012	96.7055	73.7236	100	72.7086	84.1601	76.8221	88.1042	49.6601	53.961	66.5838	66.5838	89.694	59.621	75.9031	62.8155	72.2249			80.2081	57.1046	90.0822	49.015	45.6019	100	48.1875	73.2607	31.5829
4.5333	73.8681	76.7152	95.7309	48.0903	74.2619	73.7231	59.2695	96.9203	76.9834	66.9333	81.1457	70.4965	41.4843	59.3152	60.7759	74.4541	70.8235	53.8296	18.0894	90.2429	61.8192	18.0894	90.2429	61.8192	99.9769	77.8218	78.9018	75.4938	91.6115	48.5494	54.8152	68.2859	68.2859	83.6762	55.5526	80.9422	65.3983	67.5251			69.2194	48.9686	95.0876	50.5757	56.8254	99.3967	51.9185	62.7005	30.1173
4.6667	73.2468	84.1604	95.1592	53.3799	71.3604	76.3615	57.262	88.4988	75.3291	61.9341	85.2905	76.1411	42.8501	55.9685	59.9549	70.5992	83.9046	63.0264	17.2381	87.1008	65.7445	17.2381	87.1008	65.7445	94.7173	77.8433	85.6407	92.7977	87.4301	54.243	54.1254	69.0474	69.0474	78.4041	50.8358	72.1856	62.5019	64.7259			64.1608	39.0842	95.6161	48.666	54.73	96.0685	54.0555	61.1639	35.5925
4.8	63.477	85.8738	100	55.8941	65.6494	81.561	61.6996	75.3862	79.9658	65.7344	88.8096	75.5534	43.0436	55.5333	53.3255	70.7376	99.9004	69.2578	19.1851	76.9647	66.9071	19.1851	76.9647	66.9071	81.4933	81.9182	83.1249	89.5235	89.0263	52.6373	46.9885	68.3535	68.3535	81.4886	55.0844	65.5033	60.2095	71.6285			60.2974	40.0215	97.1999	44.0718	63.7012	81.402	52.1009	75.6149	46.9343
4.9333	69.2843	77.5326	86.4164	60.5616	72.1537	84.1286	61.3314	72.1538	72.5138	63.1201	91.1292	74.9674	49.2086	54.0646	50.334	62.7303	100	53.886	19.1928	64.3618	67.9185	19.1928	64.3618	67.9185	82.7542	86.5992	81.8986	84.6955	92.1899	51.0857	44.8698	71.5888	71.5888	83.7614	64.7334	62.859	55.2611	62.881			57.8497	33.8136	100	53.2861	74.4896	81.447	40.237	73.2625	46.4787
5.0667	70.8034	72.714	80.6451	59.4192	79.4239	78.8067	57.321	68.3922	75.6264	54.3993	95.5259	73.7842	56.7701	56.1993	45.3658	59.7974	96.8842	59.5062	23.056	58.0586	66.5287	23.056	58.0586	66.5287	79.8552	88.3572	82.6075	88.364	81.7626	53.7397	39.5117	74.447	74.447	84.5117	68.9617	58.8691	50.9743	61.9756			56.6179	37.8853	97.6181	49.9074	65.0345	58.4519	41.5999	63.7962	51.8579
5.2	71.6455	65.8257	77.0345	60.5748	89.7143	79.4704	54.1304	66.3962	69.2321	53.6948	89.798	63.858	59.2959	56.9612	63.2489	64.5341	82.672	66.3996	25.1372	53.5389	70.5534	25.1372	53.5389	70.5534	77.5413	92.4015	82.5793	90.8282	77.0344	50.5505	34.3041	76.6231	76.6231	77.0726	67.3101	56.0325	52.9667	58.188			58.913	41.5299	84.9077	41.0548	70.6013	54.5725	40.9002	60.9933	47.1139
5.3333	72.709	62.856	79.6122	62.6821	81.53	81.3387	55.9865	60.5046	73.3462	55.6917	90.755	69.7082	58.4223	62.9317	46.682	66.1181	75.0731	69.9051	33.2204	58.7051	65.8604	33.2204	58.7051	65.8604	79.7441	90.3757	84.762	100	76.2293	52.5961	31.1327	72.3354	72.3354	82.8018	65.3495	58.9354	55.6363	52.2011			58.5504	42.9819	83.4973	43.7969	65.6068	71.9547	41.693	61.9172	57.9405
5.4667	69.7895	59.7905	83.6344	64.4128	80.48	86.0247	51.644	58.7015	77.083	52.9762	95.4599	65.7207	54.5174	54.6567	52.9649	66.8571	75.2342	64.4565	47.3684	60.0703	60.3263	47.3684	60.0703	60.3263	76.7638	87.9741	84.4399	94.594	79.364	56.0067	29.8377	75.8117	75.8117	92.0217	60.4697	66.5995	60.3593	53.996			63.3423	39.9388	79.8116	43.8327	50.4182	54.861	40.0661	56.0378	68.4009
5.6	72.4699	59.977	82.6958	69.0955	77.5857	82.2174	40.4149	59.3301	85.5499	54.9878	95.7144	71.3007	60.6406	64.9351	45.7105	73.1035	80.1715	58.5286	64.8095	58.6077	58.2534	64.8095	58.6077	58.2534	69.4698	83.463	89.6457	97.9171	81.0997	53.3869	28.2823	75.9148	75.9148	99.0402	54.5984	69.4633	61.6869	56.7407			65.5126	42.1938	78.5168	42.5324	35.1063	72.3689	39.4427	71.6508	68.0467
5.7333	78.9339	62.259	80.6022	73.5985	80.6089	86.8685	41.2407	62.1328	80.4489	53.2049	97.1084	67.505	60.4853	67.1722	45.2576	67.2067	62.2875	53.9407	79.212	55.3479	57.5921	79.212	55.3479	57.5921	71.0683	80.0449	89.5384	97.979	79.7937	51.7299	31.6137	74.7709	74.7709	88.3267	52.5604	78.306	62.2892	58.8111			67.8415	42.0019	76.3675	41.8824	37.799	67.7505	39.4133	69.2251	61.9649
5.8667	75.0254	63.6542	82.4724	78.2925	85.8035	90.0312	36.0192	54.0085	74.0571	52.519	100	65.3035	59.8782	71.6095	43.1104	61.1148	52.9246	57.9525	85.3577	55.823	55.0336	85.3577	55.823	55.0336	72.6723	80.8561	85.2379	84.7208	69.2613	51.0633	35.398	72.2209	72.2209	84.6228	53.3168	80.4312	63.1763	63.3387			59.9457	41.9864	71.9189	36.0567	45.6653	65.2048	39.0887	73.1395	58.2529
6	80.1064	65.0444	77.741	75.9363	83.7912	91.4405	44.3767	63.5878	75.0833	55.7711	90.958	71.8902	60.552	75.2172	44.7916	59.0693	47.4733	55.5801	91.354	53.7306	48.5863	91.354	53.7306	48.5863	67.6747	85.4166	84.2896	81.0264	67.505	54.7637	36.7392	72.1008	72.1008	78.496	53.0148	79.4957	63.4254	65.758			64.3533	47.4825	63.9698	34.029	38.2138	68.421	41.1133	76.8296	59.4639
6.1333	78.4969	62.3778	77.6836	73.8063	84.5464	100	35.7897	60.048	77.5737	56.0734	94.8827	71.5055	61.1737	72.5079	54.5653	53.2931	36.8794	56.6016	93.1916	53.7296	51.2922	93.1916	53.7296	51.2922	55.5362	87.1401	95.7149	82.7133	63.6671	56.1961	36.8814	74.6012	74.6012	78.8444	56.2747	80.307	64.331	69.3451			74.1914	42.9946	64.3387	38.298	39.4167	75.1073	36.5571	57.4287	54.4458
6.2667	78.729	63.7415	76.1646	81.7568	88.5164	91.0038	37.8305	58.8593	74.4792	56.9705	82.1372	66.7149	63.8718	69.1898	63.6742	54.0749	30.2967	56.1618	90.5343	57.4838	53.1	90.5343	57.4838	53.1	51.9816	86.516	91.6967	83.6406	57.1208	60.3891	35.8106	68.9896	68.9896	78.7062	58.8761	75.8222	67.2785	63.7772			78.1676	46.3879	75.6373	42.2075	45.7605	84.2389	36.864	69.0344	55.6881
6.4	81.399	67.9969	77.9905	90.1971	90.433	85.8907	46.6129	65.4864	80.7655	55.1669	85.0453	61.3357	63.4386	64.0374	86.4312	55.6977	27.9506	56.5367	89.3348	63.393	62.1083	89.3348	63.393	62.1083	50.4897	86.5508	92.2583	81.0573	68.2713	63.502	32.1186	68.9296	68.9296	75.069	58.8278	76.2602	73.3676	63.5961			73.1569	49.2927	80.4297	38.8493	46.9483	87.7038	33.2216	74.0748	45.5089
6.5333	84.6706	70.1219	73.4584	100	86.9993	83.0679	44.0235	49.9589	79.7897	57.153	83.6887	61.0304	55.6948	69.3559	96.617	56.149	32.8135	50.9295	84.8475	65.9041	76.1409	84.8475	65.9041	76.1409	48.753	87.0385	87.0437	78.5843	73.976	60.886	26.2122	69.6641	69.6641	75.4467	64.8921	82.8407	75.1044	62.3386			70.4007	49.6949	74.1547	34.8892	38.5038	77.8213	30.2515	71.9202	45.868
6.6667	76.9006	75.8089	75.0521	83.2427	88.799	87.9964	43.5542	46.4806	81.011	62.0144	77.8914	67.7104	60.6743	78.508	92.7511	54.4391	34.7108	46.5149	88.8299	68.7175	79.1271	88.8299	68.7175	79.1271	51.4325	81.9727	90.4523	73.8799	75.7322	59.779	23.9245	69.5951	69.5951	77.3904	80.2302	87.966	75.4913	62.6656			75.8182	46.8926	70.9497	42.7795	38.7978	89.3911	32.9218	65.8351	32.2527
6.8	75.3684	72.9148	79.5003	66.8093	82.141	86.353	41.685	51.3185	79.0204	68.0413	80.406	59.9068	56.9128	76.9854	98.4304	52.5407	38.6987	53.4441	78.1069	69.9402	77.5413	78.1069	69.9402	77.5413	47.7657	76.4041	86.968	76.6433	79.5102	63.5058	24.4181	74.6449	74.6449	72.3761	84.7699	96.2211	75.6689	58.1927			83.1472	48.7366	62.4717	46.2113	41.8604	97.7132	30.5515	77.9266	29.1398
6.9333	82.2315	74.2357	78.4132	61.0838	80.0063	78.4213	39.0744	46.939	86.3851	70.8019	79.9417	56.4988	46.2987	81.0274	93.6682	51.8097	47.1666	53.0113	60.3395	76.8082	76.3047	60.3395	76.8082	76.3047	41.8115	77.5028	85.8229	72.2448	75.9812	65.7966	26.589	78.3221	78.3221	71.3371	83.2792	100	79.6518	64.1912			78.928	43.6035	58.6383	37.3954	41.2042	99.7598	29.9001	85.7891	29.7992
7.0667	79.7521	65.0053	71.3527	59.5993	78.6746	76.4812	38.0172	45.6189	91.2657	66.9175	85.3522	63.1154	45.2937	81.256	92.8358	54.2234	54.3053	49.3354	49.3285	88.1897	70.3837	49.3285	88.1897	70.3837	33.7739	80.9376	80.4391	70.496	73.2251	76.3624	30.1516	81.0886	81.0886	67.134	89.6585	94.0897	81.2089	73.8386			82.3474	41.7418	60.5943	31.4995	40.936	99.9523	36.3813	81.2645	31.467
7.2	82.441	64.5117	68.4643	59.3821	85.1514	72.9272	32.343	45.9805	73.0758	60.1556	86.9132	60.4905	43.3934	73.9792	86.4336	65.601	58.061	44.1948	37.7039	95.4416	71.9588	37.7039	95.4416	71.9588	27.3946	79.1378	81.5576	74.3715	74.0019	76.5348	34.5851	71.9984	71.9984	63.9414	88.0341	94.8069	79.7602	81.4775			74.5762	46.9569	65.9402	25.4769	42.4267	81.4563	43.7636	67.5898	28.6831
7.3333	85.4509	63.4624	68.248	55.9854	84.1111	71.9817	27.983	45.2112	91.8118	56.0898	92.1715	65.9659	43.1992	71.9441	73.3138	77.6424	59.1959	46.8245	31.5906	96.9219	70.5274	31.5906	96.9219	70.5274	24.3605	81.5832	89.9668	77.5081	70.5187	73.8303	36.6458	73.7809	73.7809	68.6742	91.2623	83.6784	76.9615	86.1957			80.3395	43.4157	75.6799	28.044	41.1308	85.482	39.944	52.0731	29.7886
7.4667	78.9511	63.9639	78.2377	58.5196	83.2264	72.3123	33.6304	48.3323	82.7499	62.7122	84.8522	61.769	51.0548	77.4212	68.1864	75.3526	67.1642	50.007	23.6534	99.3776	67.0357	23.6534	99.3776	67.0357	24.5006	80.8612	89.4042	79.7612	71.9929	73.6438	31.0208	76.0797	76.0797	71.0679	93.6941	78.5062	72.2891	89.8393			72.613	43.7916	71.1044	35.4984	50.4094	97.4829	40.0998	63.1901	31.6669
7.6	83.3634	68.6362	76.9587	59.6111	79.9461	73.9632	33.7615	45.4183	80.1728	68.1149	81.1964	56.4435	60.3147	72.7954	73.2361	74.1025	61.4005	48.6451	21.3804	99.6471	69.9435	21.3804	99.6471	69.9435	24.8368	86.5854	85.7246	78.5044	74.2854	68.885	30.562	79.1152	79.1152	67.3725	89.6938	83.8933	70.7077	83.4809			76.3552	45.3018	64.9971	46.4951	50.0649	95.7292	42.4609	71.5081	34.5755
7.7333	81.7378	62.6516	87.3357	56.2374	80.7763	73.3846	31.035	44.2334	76.0263	71.5831	76.7078	59.4215	71.7669	70.5778	83.8849	79.3461	64.1207	43.8385	21.3022	94.3903	78.1891	21.3022	94.3903	78.1891	24.6632	88.4266	87.2827	77.1061	79.2289	64.067	28.8071	77.9623	77.9623	78.9384	92.8229	85.3328	61.8235	92.1471			64.2693	45.4653	69.2114	43.8199	47.8974	95.0884	37.4046	67.4673	33.924
7.8667	85.0503	65.9602	90.5897	55.0653	81.2748	74.6767	31.3623	47.7634	78.0885	81.4824	70.6906	62.1814	83.704	67.7168	81.8669	85.9163	66.7396	46.0782	22.2551	90.6872	74.2132	22.2551	90.6872	74.2132	23.3737	94.2006	85.7849	75.9904	92.6308	64.8305	30.7713	80.6221	80.6221	82.4949	95.2843	87.9361	51.4189	93.1126			59.9256	44.4	59.4545	44.4897	49.6401	83.4706	47.6791	68.0212	22.9236
8	89.8016	61.3184	88.7038	54.1106	71.3321	77.6761	23.1868	49.3929	88.4361	84.7089	75.7203	70.4492	82.7265	73.8174	82.5884	89.7214	74.9921	50.7547	24.3412	85.0591	69.467	24.3412	85.0591	69.467	22.7097	80.1077	82.0112	70.9244	80.1331	65.4316	27.1266	79.5397	79.5397	77.9148	100	92.9919	41.9215	90.2955			61.3905	54.9279	59.8947	39.6181	52.8603	80.1784	38.6997	61.2663	21.8511
8.1333	77.4672	57.9703	90.6285	57.3133	72.172	76.8391	23.5139	48.7164	91.1858	88.4575	83.309	76.4546	73.2771	67.6028	100	80.9896	68.6005	47.2459	27.0296	84.3097	73.0222	27.0296	84.3097	73.0222	20.5649	66.047	82.5777	75.8549	86.4672	62.2039	27.1287	92.6278	92.6278	86.3417	92.3786	75.5056	37.376	91.0468			64.9641	56.5049	64.5044	41.547	49.5713	72.9295	35.104	63.0862	20.0464
8.2667	72.4324	59.9157	88.8009	53.7539	63.3092	81.8703	21.0712	53.9057	84.8523	83.2885	81.6743	72.9287	79.1394	68.2191	97.1569	72.511	63.0497	45.7968	25.7175	77.9454	71.2902	25.7175	77.9454	71.2902	22.8842	68.7471	78.492	72.2515	84.0457	63.8396	27.5474	87.4969	87.4969	83.7187	86.7997	65.2404	34.2066	93.7102			63.5105	60.0074	58.9499	36.7801	69.7934	80.0409	46.0983	64.0622	19.4128
8.4	72.3083	63.638	81.1454	50.4713	62.8243	75.4701	19.9005	48.5796	90.8684	80.9755	79.7492	74.9271	79.7218	71.2059	96.0384	68.9153	61.0048	48.2473	25.8594	75.9151	71.1031	25.8594	75.9151	71.1031	23.2823	80.3826	79.1719	75.5061	82.9028	65.8588	29.4241	86.7083	86.7083	84.4208	91.8784	55.9257	33.5478	95.4598			54.7977	57.013	61.0573	38.9352	59.749	91.3997	43.5807	65.8398	21.0968
8.5333	71.311	62.5742	80.7083	45.4573	73.5344	77.9489	22.7892	54.6296	93.3396	93.7579	81.4468	76.4063	76.5259	66.7784	90.416	70.1667	64.5713	46.0463	24.8997	70.4121	78.9028	24.8997	70.4121	78.9028	25.5297	86.5112	75.7086	77.177	83.7961	71.0228	31.15	81.182	81.182	87.2255	86.9835	49.507	31.4854	93.8886			52.8645	55.8474	63.5059	42.3714	57.6356	69.2601	38.4988	74.2787	24.4514
8.6667	67.3179	60.6112	77.8409	50.1075	80.5457	81.3045	33.0047	63.733	85.9698	84.6719	76.5657	77.3602	75.0859	71.6789	76.2898	70.2631	65.7131	42.4863	25.0333	65.505	74.4779	25.0333	65.505	74.4779	26.7698	87.7124	74.7284	77.66	82.9512	71.2303	30.3215	82.2002	82.2002	83.1415	80.9417	41.7289	33.2396	91.0277			54.2463	50.2567	63.5574	39.4873	48.1739	88.3449	35.8802	100	18.9844
8.8	62.1884	61.2073	82.5014	54.5558	87.1161	78.6817	19.3256	65.1234	88.5727	78.5267	74.1803	80.1306	83.4699	68.8784	65.4623	67.0609	65.5756	43.109	27.551	68.2217	71.8139	27.551	68.2217	71.8139	26.7075	97.4794	63.628	77.2345	80.931	70.5423	30.1827	78.1384	78.1384	84.4455	78.7991	35.7184	33.0106	89.754			52.9924	44.5679	79.8648	43.0913	51.5601	69.5921	30.4945	63.0152	15.4338
8.9333	70.6907	62.2021	85.3885	56.6788	96.9926	75.605	20.2603	69.4473	87.3299	89.0197	74.9964	81.2837	87.2388	65.1767	62.9648	51.6633	66.1055	43.3218	30.2338	72.789	68.2161	30.2338	72.789	68.2161	25.1708	100	58.9704	79.918	84.7684	73.9039	31.1144	75.057	75.057	80.285	80.9929	35.2377	33.0613	88.7385			50.5622	42.6912	77.6967	52.6681	51.5662	55.2998	28.8127	61.0045	12.656
9.0667	70.6053	62.2533	80.7309	56.3159	100	77.724	19.7212	64.2659	100	83.7612	72.3554	76.2778	86.1729	63.6801	53.6206	48.9465	55.1318	41.5547	28.5617	80.0634	67.291	28.5617	80.0634	67.291	24.9062	96.947	57.8211	81.7703	87.4453	82.0784	29.0846	79.7382	79.7382	78.5221	79.4831	36.5057	32.8627	86.5285			48.6273	39.2041	76.6797	73.3899	44.2605	59.5484	33.6838	60.0893	11.0071
9.2	75.9018	62.4908	78.9101	60.4472	98.6528	82.269	21.4701	65.3592	99.0529	95.0113	63.8628	81.4156	100	62.907	49.1422	44.0219	55.9316	44.5613	25.9207	73.5266	68.0628	25.9207	73.5266	68.0628	23.2685	89.9566	61.8163	84.1743	90.5858	94.5707	27.7469	82.146	82.146	82.408	83.6614	32.4208	32.5945	72.6743			51.6375	38.8862	84.5952	65.2285	29.2152	73.4088	26.3968	59.1819	11.4706
9.3333	69.7827	66.4438	79.5237	64.176	86.384	77.7806	22.4635	60.6823	87.5235	88.351	64.8523	79.5575	88.9548	66.1201	52.5637	41.9174	50.8597	56.9705	24.7418	69.8099	70.4176	24.7418	69.8099	70.4176	22.5068	92.0738	66.6253	82.5173	89.7069	98.4817	28.7784	82.3873	82.3873	84.3241	85.6412	32.1528	31.9876	77.9072			54.5192	41.7653	87.5769	63.7677	34.0724	50.3509	25.7904	69.8794	11.8221
9.4667	74.6403	67.9624	80.8813	59.7539	79.2715	72.99	22.2143	68.0298	92.0546	98.3937	68.73	74.6515	78.1568	54.1623	47.2594	44.1026	43.8654	58.8726	21.802	74.7562	68.6874	21.802	74.7562	68.6874	19.6682	90.563	65.3763	79.5359	97.8079	100	28.3565	86.9701	86.9701	84.3123	71.4516	34.0527	33.8728	77.8978			58.8677	40.0763	82.1864	64.1043	25.9984	44.6994	28.4977	70.5171	12.1861
9.6	76.1717	61.7874	76.5559	56.7519	82.3047	70.0439	26.8816	65.0391	92.379	85.642	64.1424	77.5672	78.1014	46.22	43.4508	38.3794	38.8347	59.3717	21.7268	83.0189	67.6408	21.7268	83.0189	67.6408	20.5358	79.8092	64.3709	84.1244	97.9285	97.1639	28.3296	95.435	95.435	87.6744	61.9396	36.4825	32.8557	70.1419			58.007	39.629	89.4203	61.1413	30.7535	37.7865	31.9412	57.4121	14.3713
9.7333	75.341	61.5143	80.3665	50.0419	74.5492	66.6647	18.6899	64.6934	83.4496	79.3878	57.2877	78.4208	65.8105	43.9148	47.6728	35.7268	38.0475	54.8534	20.5592	81.8388	58.8492	20.5592	81.8388	58.8492	23.6062	80.9791	62.1677	79.0008	98.37	85.922	34.0684	100	100	83.7856	59.5274	35.6407	35.2243	58.8644			53.1874	45.3972	83.9651	59.0559	45.8595	48.5886	28.1228	63.2131	12.4779
9.8667	72.9107	65.2071	76.1746	56.1197	64.7667	64.9012	17.0896	68.4948	72.9852	100	62.7881	83.2199	64.8341	40.1633	42.7456	35.5858	41.1897	54.5185	18.3292	79.2222	52.207	18.3292	79.2222	52.207	32.0941	86.7451	72.3813	67.9316	92.9903	87.3367	37.5004	96.9212	96.9212	90.5539	58.3485	40.0002	35.287	59.5155			47.9743	41.4705	82.5496	59.9028	35.2956	40.6842	30.4367	81.4029	13.6909
10	69.4877	66.5483	79.5056	57.6539	61.3807	60.8239	22.6435	70.7717	67.5986	92.114	65.4289	92.4302	61.1475	41.8314	52.0154	30.2244	43.497	58.7757	18.2614	81.7439	52.6938	18.2614	81.7439	52.6938	61.2927	89.63	61.2927		92.2717			99.9385	99.9385	93.5352	57.0104	35.7248	37.7746	59.5006			51.5104	44.4526	80.6579		34.4268	35.3153	29.947	71.321
10.1333	69.3425	79.0842	87.1031					68.9426	69.4811				68.4878																												50.347
10.2667
[truncated: 95 more columns]

## Sheet: Figure 6C
wildtype	odr-1	tub-1	odr-1; tub-1
0.0169285	0.0293089	0.0810745	0.109537
0.00336232	0.121605	0.0108678	0.0256572
0.0100605	-0.0060671	0.00641864	0.0249357
-0.0092534	0.030353	-0.006615	0.00803483
0.0268389	0.0251354	0.0189142	0.00797351
0.0135917	0.0908545	0.0197207	0.015138
0.0562925	0.185207	0.0278678	0.0314713
-0.0057453	0.312984	0.0144223	0.0252518
-0.0063662	0.0078849	0.0110999	0.0329001
0.0134905	0.0292924	0.018069	-0.0005479
-0.0007233	0.0225804	0.00737789	0.0129135
0.00235427	0.0369821	-0.00638863	0.0158346
0.0178893	-0.187732	0.0116948	0.0535855
-0.0015154	-0.0159201	0.0104707	-0.0041774
0.0165477	0.0358006	0.0236503	0.0361227
0.00463091	0.0725566	0.00345284	0.016175
0.0063361	0.460845	0.00912478	0.0203515
-0.0148338	0.00023372	0.0146555	0.0517267
0.034064	0.0286289	0.00765197	0.0234688
0.00986917	0.0452509	0.0143168	0.0338503
0.0323229	0.164439	-0.0017519	0.020735
0.00274815	0.0590382	0.00989784	0.030685
-0.0183291	0.327482	0.0247434	0.00570533
0.0162726	1.51747	0.0122513	0.0609664
-0.0002356	0.0217271	0.0172263	0.0290517
0.00919876	0.099444	0.0184208	0.0303717
0.0446885	-0.0103908	0.00999991	0.182241
0.0277566	0.0487322	0.00880785	0.00775012
-0.0094384	0.0999195	-0.0020621	0.0175116
0.00208038	0.0147764	0.0055315	-0.0045023
-0.0110929		0.0531101	0.024338
0.00516055		-0.004869	0.0241104
0.0190831		0.0939631	0.0184689
-0.034044		0.00530933	0.015473
			0.023424

## Sheet: Figure 6E
Distance from cilia base	wildtype																																					odr-1
0	39.2482	36.4043	0.251001	43.2441	13.6653	26.0547	19.3673	28.8883	43.4663	42.6329	14.6423	38.8345	32.3476	37.2267	42.8107	21.2833	17.5622	30.8166	49.6676	23.12	46.0197	23.3893	22.6572	51.1058	39.0317	28.3624	20.6714	35.2935	51.2307	46.5067	46.0118	16.3078	52.5022	52.5022	44.4448	64.3853	35.4043	82.6388	84.4887	75.8024	59.9609	52.345	67.9176	68.0882	90.4406	76.1593	87.3197	81.1081	88.5554
0.1333	42.7557	44.2038	0.319796	52.6753	19.7273	38.6891	26.442	38.2157	53.7286	48.5806	22.8866	41.7947	55.084	41.6086	46.4349	29.8743	24.8076	40.4982	59.1625	29.9192	51.8193	33.5339	33.0994	53.4351	52.1169	42.302	28.9635	45.6734	56.5071	61.0952	47.6537	24.2844	54.1555	54.1555	52.0767	74.7846	48.2301	84.5154	87.812	81.0022	63.8312	56.0078	70.9174	72.2427	92.8637	84.076	93.2185	96.6872	91.589
0.2667	44.1408	45.0189	0.430804	60.3836	27.1279	48.1251	31.9698	46.7664	56.067	52.01	32.8726	44.0912	64.1386	46.5975	46.9599	40.5147	32.5427	53.5108	60.4816	37.6309	53.8231	48.1251	41.2468	56.0464	52.7973	60.5301	39.9219	53.0535	55.4915	64.1482	46.4402	33.1281	56.7749	56.7749	59.0703	80.5218	62.8402	88.1379	94.404	83.1115	62.6593	53.7299	76.6711	74.0735	96.5676	88.4167	92.677	99.1224	93.2509
0.4	46.6584	44.9499	0.537478	63.4613	37.4758	50.5784	35.0904	48.4512	62.3673	51.8099	42.344	45.7315	62.8615	49.4865	45.9436	48.4711	38.6333	67.1111	59.6289	41.2427	53.4569	59.3154	42.0837	53.3091	54.5435	72.8823	49.904	57.3528	57.0845	64.593	45.2172	40.0421	59.7946	59.7946	64.7949	80.1192	67.5656	90.9063	100	84.9175	61.2394	54.2365	80.3124	78.1819	97.396	88.9833	90.5548	100	94.1835
0.5333	46.0775	44.2395	0.62301	64.1524	43.1018	48.4924	37.3683	55.0359	62.0776	53.4763	47.1073	47.3151	59.5823	48.9975	46.154	51.9451	42.2693	68.59	63.3824	45.1579	53.1311	63.3019	46.0358	51.6984	56.0023	78.4929	57.4209	57.385	56.2747	61.1533	44.6846	45.6113	56.5673	56.5673	67.4233	83.9772	67.9413	90.2006	98.2019	84.6932	63.3281	54.8481	83.0375	77.6997	98.1815	86.9817	86.9169	98.3794	94.3879
0.6667	43.9679	44.4521	0.619695	61.8383	44.7906	48.5733	40.1662	56.0383	60.6148	52.6476	48.5776	48.3671	59.0058	48.7417	45.189	52.199	43.4942	68.235	73.7831	47.6762	55.0891	62.9174	49.508	51.5332	56.707	80.4378	56.1531	57.944	55.8243	64.4236	52.6736	47.5639	56.3689	56.3689	65.9026	93.9152	63.3629	91.105	98.2019	80.658	62.7643	55.8124	87.4056	76.8784	97.702	88.5177	92.3273	95.2565	91.7524
0.8	43.7625	46.9457	0.595598	56.4511	42.9123	48.9485	42.1358	60.8889	62.7159	55.4058	51.261	50.4124	60.0489	45.7075	43.9749	56.2685	42.5268	68.8137	84.7388	47.1406	51.3452	62.0708	47.1069	52.0223	54.3117	79.0444	54.3848	55.1716	57.9517	61.776	62.7625	47.3415	58.4289	58.4289	68.6278	90.2018	60.2884	95.1442	94.3001	77.1806	65.2689	53.812	91.8452	76.716	96.1405	93.7583	87.3008	91.1174	90.3706
0.9333	42.5602	49.7287	0.542704	55.5333	41.6556	50.4492	41.1577	58.9795	64.5958	61.9427	49.4601	56.6384	62.7669	45.252	42.3928	62.2706	47.5305	72.2837	94.148	47.3881	52.6504	61.5469	46.0072	55.1616	54.176	76.3121	53.4375	56.4743	64.9837	64.3824	77.9166	47.4643	63.5937	63.5937	65.825	82.819	61.0299	96.2395	88.2768	79.5473	66.0003	52.9627	96.221	76.5252	100	92.9945	93.3611	86.786	90.2741
1.0667	44.049	50.2402	0.549535	59.2388	44.9623	49.3233	41.103	59.1954	61.1815	66.0011	49.3846	66.8433	65.7112	47.2542	41.1169	67.3915	44.2428	64.5035	100	48.2269	52.5458	61.861	46.2023	51.1512	54.6974	74.0251	56.5913	57.0995	68.6755	64.2438	87.1833	43.8078	69.1111	69.1111	60.9077	78.9228	59.5157	93.8367	88.2949	77.612	62.3615	53.205	97.4266	76.6678	96.7089	85.065	93.2078	85.2458	90.6966
1.2	44.9086	55.8601	0.515324	58.8316	48.0738	51.3734	43.928	57.6072	59.5764	69.416	49.6277	71.8626	69.9017	50.4212	41.2189	70.3923	45.5969	68.8144	98.4279	51.7119	49.1225	61.6859	44.481	48.0547	59.8656	72.2219	52.9835	59.5507	74.3094	71.7181	93.2189	45.394	76.7586	76.7586	61.0122	72.5436	60.4931	90.054	88.2193	78.2242	62.9428	53.2353	100	77.4253	97.2319	87.1643	93.0475	85.2049	92.1608
1.3333	46.5766	64.1322	0.487526	73.4348	55.1434	52.1651	51.1183	65.7228	58.7888	75.9534	49.0523	76.7107	80.6087	56.6888	42.3778	72.5225	47.1014	67.7951	93.3987	58.7934	50.4815	60.4221	49.9541	46.4277	68.4248	72.1743	51.9766	67.8307	78.2917	75.2953	92.1055	45.8776	79.3764	79.3764	59.3447	71.0486	59.7167	89.814	85.1766	84.3856	61.286	54.3599	97.6498	77.1975	92.0857	90.487	91.0772	86.4462	93.3843
1.4667	54.5319	73.4431	0.447991	83.3427	68.0048	54.4427	59.1041	71.2845	62.682	78.7405	47.5172	86.4679	89.5733	62.3003	43.9035	77.4652	52.8307	67.5212	87.5319	67.286	47.7767	59.8481	55.9312	52.664	76.9794	74.1773	49.9665	71.5419	78.2846	82.4171	92.584	48.1412	81.8614	81.8614	56.2917	81.1418	57.0471	87.3518	86.0713	86.8264	62.548	54.5071	98.3447	74.2274	93.4271	87.071	92.2444	92.4152	94.4527
1.6	64.4953	81.1219	0.421694	94.0745	77.6405	62.8493	66.2774	83.9585	72.8056	76.1337	48.5636	95.2034	91.8034	68.5357	45.3323	80.0357	54.3446	66.9147	87.2563	77.737	53.8578	63.3753	68.1089	60.907	83.9789	70.9134	46.6677	76.8246	80.3665	81.4665	93.7357	55.4576	77.2373	77.2373	56.3355	89.3764	52.234	86.028	85.1244	92.9262	62.4353	55.9886	97.9894	70.8539	93.135	83.4292	92.2607	97.3623	93.4066
1.7333	75.0898	86.9497	0.409459	97.4498	82.0486	73.444	71.1814	95.2234	83.2842	75.796	53.2274	99.1591	89.1349	75.8594	48.5236	80.174	59.4653	67.2608	78.8634	86.248	66.826	72.8405	78.2998	68.7361	85.9333	67.3677	43.8114	79.9856	76.2905	89.1977	93.3476	68.9929	74.7911	74.7911	59.4442	93.7804	54.1311	81.6364	84.7023	96.205	62.0061	52.6739	93.8575	72.4662	93.8079	86.2836	88.6447	96.7107	99.4251
1.8667	79.176	90.2679	0.404429	98.5071	81.7525	81.0907	74.687	92.3018	89.2126	76.0408	56.3039	95.7685	86.6006	82.6889	54.4768	81.442	67.4055	71.1673	74.2418	95.081	69.6769	83.911	80.3769	78.5418	85.0482	69.7185	48.5577	78.4998	82.2515	96.4127	90.6176	80.892	74.0429	74.0429	63.5	94.8164	60.6099	82.4067	85.4714	95.0443	60.1726	55.8824	91.1689	77.0762	91.624	100	92.2852	92.0563	96.3484
2	81.1823	96.0414	0.434737	95.4668	80.6463	83.1896	74.1978	100	92.4844	75.0676	67.7914	95.2897	85.6483	82.9024	62.2618	77.3849	75.1237	73.8634	72.7119	96.0789	77.8371	91.133	85.3833	85.1692	85.4282	81.3757	59.1288	79.5029	74.7383	97.8107	90.6992	89.7714	76.4968	76.4968	75.7585	96.865	71.694	85.6493	88.4781	97.8115	62.532	52.4801	89.8633	74.3921	91.135	97.255	94.704	95.97	95.3502
2.1333	84.641	100	0.467224	100	74.9021	82.0067	73.2325	98.5556	94.2043	75.0295	75.362	89.4347	87.6131	83.3928	68.8025	76.3681	77.7493	82.5439	70.0556	95.9241	86.6459	97.8049	86.929	89.3888	87.5332	85.816	78.8406	83.5318	71.0828	100	87.7353	100	77.1044	77.1044	65.3791	96.2151	81.1757	84.4383	87.7101	96.3667	59.503	52.2795	90.3628	77.6786	90.6991	92.7242	94.4782	93.8887	96.2886
2.2667	91.1146	96.5558	0.498811	97.8336	71.1976	80.8979	72.3306	98.4103	100	74.3409	84.7708	96.9222	87.224	86.2921	73.8218	78.3038	80.5815	92.4069	71.2043	95.9564	88.3	99.115	88.8637	96.3451	85.9571	88.9193	88.7164	83.5705	74.1162	96.695	86.2895	98.0489	73.0619	73.0619	62.2549	96.7599	87.7103	85.969	87.6443	95.8319	61.1608	53.6571	93.9935	79.834	91.135	88.6102	91.2404	89.3091	95.6112
2.4	87.8582	95.0453	0.554261	98.1767	69.817	79.513	71.4029	96.0306	97.5561	80.7556	90.0479	92.8253	92.6963	87.1154	75.853	75.9481	81.7734	93.4237	68.0696	97.3727	88.449	97.5659	89.4269	98.2041	85.5174	88.2044	92.1817	85.9293	72.8854	93.7453	90.6967	93.3971	69.8241	69.8241	58.3409	95.3391	91.3272	86.4227	88.9692	100	60.1723	54.8855	89.6876	76.8852	92.3771	89.9963	93.262	88.9034	95.4625
2.5333	92.6427	97.1193	0.626605	92.6671	72.4517	75.2747	74.2804	90.7796	97.9903	78.8532	90.2945	93.9524	93.0001	84.1031	75.0101	73.4246	83.2698	96.1884	70.4868	99.745	89.4599	100	90.7848	98.5168	86.0337	90.2281	94.4834	91.0909	74.0525	93.267	100	89.7136	66.6143	66.6143	60.8179	94.4333	100	86.9061	84.3856	94.7331	62.3457	50.6209	84.3435	76.6604	91.509	87.0138	91.6812	90.1949	97.2536
2.6667	93.593	94.1196	0.680502	92.3847	76.1655	75.2123	73.5851	90.8551	96.6219	78.7182	92.9384	92.757	93.4738	84.2502	76.024	71.6201	80.0985	97.3801	69.0933	100	94.0142	96.9652	95.7019	99.1935	84.8602	92.255	98.0123	94.8952	75.0656	88.5214	93.2358	80.484	65.5614	65.5614	65.6081	95.3499	95.7146	87.2059	84.6963	92.6932	64.5804	53.1048	80.5682	76.4942	92.0244	83.647	91.0608	86.7165	97.813
2.8	95.844	90.1909	0.758027	92.949	77.0263	73.9615	71.8491	88.33	96.8371	80.9877	95.267	92.4637	93.8543	78.933	74.7871	68.5189	79.7079	98.9021	74.2165	96.5593	87.7328	92.2982	99.3371	98.9979	78.8409	92.6623	94.1218	99.3118	75.7288	86.3227	90.0131	76.3521	58.3815	58.3815	73.6736	91.8185	95.4254	89.8345	83.7922	95.3618	65.9095	50.6899	76.9132	72.3486	90.5643	87.6698	92.5743	89.6302	99.6976
2.9333	98.7749	90.2761	0.855893	95.9837	82.3352	74.8141	73.5578	89.337	95.459	83.2297	96.7793	90.8125	94.0339	76.5636	75.981	72.5844	81.7092	92.8277	76.4216	95.5904	88.8558	92.4741	100	99.8597	86.1656	86.3481	91.2013	98.0842	73.6829	86.825	95.5294	77.1625	62.7112	62.7112	68.9	97.5391	94.6852	92.4134	84.5805	93.3528	69.8807	51.7168	77.8177	72.442	90.8027	85.0611	91.2397	84.5558	94.525
3.0667	100	90.2892	0.903864	90.7265	89.6319	78.1577	73.7139	88.5538	96.426	82.7926	99.6085	92.9952	95.0267	79.0706	72.7374	73.7759	85.1137	91.3796	78.8374	98.7822	89.8398	89.1572	97.8807	100	91.3041	89.2054	90.4789	98.3018	69.3811	90.8673	93.6154	78.7259	62.8675	62.8675	69.9899	95.114	91.947	94.9831	84.8528	91.3751	63.9216	51.7649	76.0315	72.5466	92.076	85.5575	94.1815	81.9329	95.1257
3.2	97.785	87.1115	0.957484	87.1159	94.4968	78.3999	72.0653	86.0754	96.7166	79.5529	99.689	89.2349	94.9405	78.4974	64.9282	75.0519	86.5355	92.1782	82.9031	98.5108	88.0715	84.9461	96.8795	98.5165	92.9615	93.6098	87.1735	100	72.3907	91.9115	95.3792	80.0209	63.7438	63.7438	76.1416	90.5484	88.1312	88.9606	88.0154	91.6034	62.2464	51.8636	76.605	72.2495	91.3743	87.7425	91.4871	82.2366	91.2216
3.3333	97.4901	86.6141	0.940057	88.0105	94.0805	84.0303	71.2446	87.7511	95.6877	81.4551	100	89.377	91.4022	79.0623	63.0168	77.9122	84.603	92.6445	85.3982	95.4244	88.1554	90.9539	95.7227	99.64	94.994	92.3542	93.3411	96.7159	72.13	90.693	89.9142	79.6572	64.3404	64.3404	77.1641	89.764	88.6855	89.3627	88.434	90.86	64.5242	52.0706	74.4624	72.3022	90.6852	88.7037	91.8085	80.767	87.7678
3.4667	96.2939	85.6971	0.908791	85.8316	91.7087	87.2034	70.9075	85.6602	92.5477	77.4598	96.8887	92.9076	90.5472	80.6943	63.5498	79.5155	78.4152	96.1102	85.4877	90.6425	87.0633	86.6046	95.057	98.2798	98.6976	91.2989	93.2545	93.5785	76.1724	88.1362	86.766	78.9586	72.4027	72.4027	76.278	86.8367	87.0516	84.6007	89.9324	86.3479	61.4853	50.4188	73.3431	72.5936	91.7378	87.8178	90.1013	83.0782	89.6043
3.6	93.2993	86.7339	0.906268	83.6928	90.4911	94.8357	67.4978	85.4141	91.5406	72.5332	92.1806	94.3658	89.1835	81.7276	65.9717	79.785	75.5028	95.1039	87.6382	86.8468	87.5302	88.4945	92.4022	95.0144	98.2534	90.9702	92.8124	89.7231	74.4254	83.411	83.0147	78.8488	77.1807	77.1807	78.9818	86.8381	83.0752	83.3271	93.619	81.6389	59.81	49.0136	72.4145	72.85	91.511	91.1252	88.8817	76.9124	88.7601
3.7333	87.4566	85.0439	0.87405	85.2143	93.7151	97.3384	66.9895	89.406	89.1495	72.3061	88.4259	94.785	87.813	84.8709	73.4194	81.4118	79.3421	98.6616	88.066	81.3737	92.592	87.9862	91.7279	94.5105	94.7835	91.1723	95.3901	88.3759	78.286	77.5909	78.6078	79.8787	77.3486	77.3486	76.3707	87.1055	81.4233	82.9733	97.1842	80.6837	62.0848	49.4049	72.5777	74.4546	91.7865	90.2491	86.2034	75.9792	86.9703
3.8667	82.2935	84.7465	0.836673	90.2465	89.843	97.8097	65.766	91.9901	89.6491	65.5289	86.4736	95.9529	85.0248	83.6319	87.0951	86.4282	78.5061	100	90.8155	75.4853	94.6687	92.1194	91.4829	91.7101	93.7587	87.334	89.7822	84.177	79.6939	75.2158	78.0515	79.6615	80.4051	80.4051	74.6119	87.3476	81.8207	81.9924	98.4801	81.7374	61.1386	50.7766	76.5221	73.1161	89.0871	86.7999	87.9543	75.1798	89.2756
4	78.8527	85.3217	0.863706	85.0495	88.189	98.5962	67.1494	95.2027	94.4743	64.0256	86.1175	100	87.7179	86.0636	94.2826	89.1733	81.9667	93.5045	90.9728	70.2041	90.5801	91.0889	88.5532	89.4663	100	82.5363	92.8937	79.7144	80.212	76.4993	77.8536	80.1756	81.6533	81.6533	73.9552	87.2635	82.4224	83.2134	93.224	84.0924	59.9256	49.3641	75.7718	74.9882	89.6727	84.6475	85.8766	74.8866	88.3995
4.1333	75.0532	84.4213	0.8489	86.2079	87.8177	100	67.7237	93.593	96.7093	61.0295	86.915	96.2059	86.8244	85.1256	100	91.3472	80.4064	93.112	90.6939	66.6015	89.3471	91.2453	84.4345	89.102	96.598	85.4083	93.684	78.6429	76.9825	74.1289	76.6501	76.2176	86.1774	86.1774	74.4927	89.1225	85.1166	81.7109	92.6819	85.1753	58.3003	48.0136	74.7091	75.6579	91.0105	83.6583	87.073	74.636	88.8187
4.2667	74.2865	83.5539	0.779392	81.3737	86.7621	99.6477	69.4432	97.6296	98.6246	58.6987	87.2508	92.5879	89.2615	80.2897	98.9106	90.2959	84.6633	90.7191	87.4983	67.2712	92.693	90.8446	80.7411	87.6741	90.7582	84.2488	93.1318	79.0643	75.0419	71.0921	77.8558	77.8043	89.2203	89.2203	78.1788	91.1343	87.123	83.8368	90.8403	84.8889	58.6108	47.9797	75.7971	75.3642	90.4537	85.376	89.4588	78.9822	92.1686
4.4	74.701	84.6365	0.712372	82.0958	88.3847	97.6473	72.1802	94.2457	97.7697	53.6542	85.9865	88.5915	87.8304	80.5412	98.9446	91.5303	81.491	89.0824	86.6029	68.5421	93.6229	93.8181	81.6929	86.828	88.8629	80.4523	94.9341	83.6112	71.6752	63.2559	74.8029	73.1989	96.865	96.865	80.1294	93.4869	86.8273	82.5673	90.235	83.2037	58.5102	49.4819	74.5797	76.3919	91.2976	87.9017	88.6484	75.4453	100
4.5333	74.097	86.0009	0.595825	85.6951	84.2751	95.0075	72.58	94.0403	97.3909	59.1236	86.0353	84.2499	85.3642	80.2769	93.267	88.7463	80.6963	88.087	83.2225	64.778	90.5987	94.2172	80.969	87.6938	83.3305	74.3427	92.0194	83.742	68.007	65.3695	67.1763	70.9808	100	100	83.3887	98.2307	86.9761	81.3074	86.7843	82.862	59.4156	50.9444	77.7386	74.9668	89.7939	83.0281	87.321	74.1446	96.4163
4.6667	73.0317	85.4672	0.548969	82.6536	83.7683	95.9657	74.6431	92.8818	94.3362	52.532	89.7153	80.9107	86.8413	81.9118	90.5712	90.0193	79.0287	82.914	82.1853	67.7551	89.7573	94.6574	78.9686	86.3522	85.0587	71.5343	90.1738	80.9413	68.0148	67.0921	63.8918	65.1942	92.2574	92.2574	89.9586	95.6963	84.6421	80.3878	90.9885	77.6216	57.0813	50.0027	82.897	73.8031	90.4256	89.2117	87.0401	74.7549	91.9785
4.8	77.5549	87.9319	0.516707	85.6305	87.6245	96.3699	73.5565	95.1264	89.3926	51.9957	92.6071	76.9147	87.0296	81.4019	87.7381	86.5435	81.3515	77.5105	81.349	71.5868	91.4146	93.7434	75.311	86.9329	81.9685	68.3456	89.4048	87.6208	64.727	64.7197	60.0963	60.3817	87.8303	87.8303	87.9437	100	88.667	83.1104	90.5676	76.7858	59.5988	49.5713	79.8591	72.0153	91.2109	80.7457	86.924	74.6398	94.7661
4.9333	80.1816	89.5826	0.53807	80.2324	93.003	90.7359	75.5148	94.5001	87.616	51.7052	96.0068	77.4698	87.1119	82.2679	85.06	89.4483	78.7261	74.0149	79.9667	69.8873	95.464	91.325	73.3986	86.6239	78.144	65.7943	100	82.7422	63.0748	66.0562	56.7945	52.8902	90.0707	90.0707	88.3633	95.9936	88.5633	79.6414	88.3123	78.4215	56.9899	50.0495	79.7044	73.0678	90.7014	79.3872	89.5106	76.1926	95.8009
5.0667	79.7074	90.0426	0.53208	81.5291	98.3578	88.519	76.4406	91.6094	86.948	53.6045	94.9563	75.5591	88.8274	84.3071	82.7528	89.3245	79.6507	72.7017	80.1952	67.9981	95.3634	89.2154	72.9465	85.8744	79.4767	60.7614	82.898	78.1814	62.7801	62.3136	57.5388	48.5818	88.5781	88.5781	90.3462	94.7914	83.5168	79.0665	85.8058	75.0738	57.4896	48.0434	84.6569	74.5596	92.4887	79.2367	90.0077	75.076	89.4946
5.2	80.6594	89.3933	0.549183	83.8958	99.6301	86.1001	78.204	88.1931	84.6118	57.0456	94.2016	77.9706	91.5138	84.5376	84.8858	90.2816	78.3874	78.2381	80.5002	67.1889	98.9243	89.8897	71.4399	89.0581	81.9711	59.696	88.7941	76.4675	64.5039	65.0135	61.2321	49.1564	83.357	83.357	100	91.835	79.3612	81.5356	85.3543	79.9523	57.4914	46.7123	80.9913	74.4779	93.2319	78.0781	87.9813	73.7023	89.6898
5.3333	83.9346	91.583	0.619749	83.5506	98.0633	86.1558	75.4314	89.8187	83.385	52.2638	93.0068	80.4357	91.4199	89.3928	74.7095	90.1131	76.1314	70.4183	85.1104	65.1374	92.3706	89.0683	71.3363	82.7561	86.3072	61.1359	89.3882	73.1191	64.6476	64.4013	62.6881	52.7901	82.833	82.833	93.0837	92.1826	78.0452	80.2349	85.4639	77.0019	57.0465	46.4915	79.711	75.5426	94.4656	76.5549	84.9144	76.3011	88.2593
5.4667	84.7571	90.6248	0.642315	80.869	96.8643	84.1387	75.3808	92.9394	81.4697	62.2965	86.2008	80.6139	91.3986	87.7402	77.8516	91.0673	74.3721	69.9434	89.232	66.9578	92.6642	86.2523	67.4406	78.1711	85.317	69.214	87.6345	71.9541	62.3507	65.91	58.2333	57.6453	84.4606	84.4606	89.3174	91.6068	81.0203	79.8661	86.65	76.1075	56.3969	48.3487	82.1927	78.0501	93.5638	76.6655	85.222	73.9506	88.2649
5.6	90.3852	86.0435	0.65354	82.0831	97.1063	85.0262	76.2434	91.4355	80.9653	62.9669	87.2623	82.1331	92.9558	94.5217	76.1793	92.1575	73.2692	67.4706	90.8929	65.303	89.8782	84.4897	65.546	77.0341	88.3159	69.7974	81.5483	66.2346	66.317	62.2239	55.7207	56.0282	78.1687	78.1687	88.7078	91.6669	83.6977	79.1214	87.3026	75.4774	58.6529	47.2574	85.0345	74.8746	91.7201	78.0425	85.676	73.1319	90.6598
5.7333	88.7391	83.1935	0.665614	79.6239	96.7121	84.2502	75.8234	89.0631	79.0756	61.6709	82.9512	80.6852	94.0981	89.2915	72.9783	93.064	72.4984	67.9437	93.2148	65.2907	87.8017	82.9215	64.5327	74.4988	84.9344	73.1114	77.0164	64.7704	67.071	60.253	58.3913	56.8185	67.9829	67.9829	86.4423	86.087	85.8765	78.9974	89.3134	79.0228	55.8596	47.9951	82.1701	73.9261	90.5357	78.5168	84.1531	75.7122	91.7826
5.8667	92.9048	84.6096	0.680359	78.3018	97.3017	83.665	80.8096	87.14	75.5481	68.7318	81.8666	81.5934	95.3737	93.0324	65.596	95.9121	71.1834	66.9543	97.7325	63.7283	83.7775	79.032	64.4924	76.3876	84.9622	78.9865	71.7588	62.4383	70.6757	60.3035	52.1795	55.8063	63.7286	63.7286	86.3359	82.5995	83.4944	77.8341	86.7031	75.9504	55.4787	47.9873	80.7226	76.208	92.1614	75.99	89.6189	73.0671	91.4806
6	90.8555	85.4767	0.685487	76.1819	97.6636	83.7025	79.1263	84.9392	73.9554	64.6711	83.105	79.5526	96.2015	98.3548	55.4445	98.7423	70.7763	64.7554	97.5073	62.5376	77.1149	76.6392	67.5464	74.1849	79.159	90.038	69.5605	58.4505	75.5914	60.8998	48.4143	52.9494	56.4397	56.4397	89.2471	76.609	83.1371	77.8897	85.1014	77.9441	55.1383	45.4785	83.7783	75.7768	92.3103	73.8203	92.4738	75.1798	94.4069
6.1333	89.2437	83.6067	0.680304	77.2955	96.014	88.4618	82.5945	83.573	75.2064	60.4643	79.1413	77.1334	100	100	54.9036	100	70.5867	68.0346	93.7902	58.8744	74.8907	78.1321	68.7138	82.766	81.5185	90.8773	67.264	56.5361	74.4669	63.4474	47.3569	52.8697	54.4519	54.4519	85.1661	76.0408	83.1403	79.8464	86.1035	80.9093	55.0005	44.7835	79.4145	71.7528	92.0354	75.2026	89.8346	75.0599	91.677
6.2667	88.6152	81.9078	0.745593	76.0519	97.9203	81.3851	81.2006	80.9363	76.5613	63.9543	79.0771	77.87	95.3916	99.496	52.0144	99.4464	70.6833	65.6948	90.0435	57.0088	76.2929	79.5466	72.173	81.0289	77.6833	93.0341	67.7203	56.4408	74.9918	69.4991	48.1454	55.5936	52.4683	52.4683	80.1833	78.8355	85.6423	80.6603	88.73	79.5049	54.5458	45.0357	82.0335	71.525	94.322	77.4568	88.7915	73.2062	89.4169
6.4	86.1336	78.4276	0.8013	76.158	98.0462	83.0023	84.0377	78.0774	77.3421	64.7678	73.3393	78.6825	88.7657	91.2127	51.9814	99.5706	70.3827	69.2956	88.0262	51.1272	72.5378	78.8722	73.6589	86.2855	73.6313	91.911	65.0369	58.413	81.8884	74.7835	50.9772	59.1233	48.6374	48.6374	79.0729	75.4375	88.4789	77.191	89.8486	78.5654	54.2496	45.6329	83.3219	69.9462	92.1559	76.2404	89.0969	73.3213	89.184
6.5333	84.7604	80.49	0.902227	77.027	100	85.7843	86.4584	76.0677	78.1853	67.697	72.2269	77.3827	88.0269	84.1374	50.1056	96.7262	77.1147	67.4596	84.6145	49.331	71.9788	77.8602	79.0513	83.5145	68.6392	93.7514	67.4562	58.4326	82.148	78.3566	48.4981	61.7779	45.6554	45.6554	81.8054	75.9998	85.5412	77.1401	89.4704	75.0549	54.2009	45.3751	80.3068	71.8965	90.9646	76.1923	88.0419	72.9976	88.1886
6.6667	85.6459	81.8734	0.910294	77.3153	99.5537	83.083	89.4043	77.1453	79.1118	68.5335	70.9043	80.0744	87.0007	75.3987	49.9933	93.6441	80.2398	67.4824	82.7384	48.3358	75.3344	79.5015	76.3333	89.4697	62.5966	98.227	67.6351	59.4033	78.4744	83.0371	48.034	61.2349	46.7057	46.7057	86.1227	73.8554	81.6894	77.8958	89.2067	73.9871	55.1066	46.3547	81.9916	73.836	91.9353	77.5953	87.5736	74.0191	87.5681
6.8	86.233	78.9258	0.936061	77.2089	97.1766	79.6673	88.9086	76.9967	79.7355	71.0634	70.3839	79.5465	87.3541	67.6188	49.4975	83.4378	72.6722	64.1698	80.9476	48.4974	68.0969	80.4143	75.6993	91.8705	61.7159	98.2195	69.2528	58.48	79.7579	83.9466	51.0261	61.5737	46.7341	46.7341	84.7688	73.2383	83.1716	78.5096	88.2272	76.4849	55.5461	46.945	82.8053	73.7514	92.8007	76.979	85.3056	76.8153	86.8444
6.9333	82.5356	75.7937	0.960894	81.9033	94.5942	82.7284	89.5377	76.0472	77.6469	73.0139	71.4096	82.2741	89.3829	60.4084	51.315	70.7441	74.7874	60.8466	81.4048	44.2955	67.1906	76.9481	77.4328	88.8314	64.593	100	70.4666	59.5626	82.6187	80.9938	51.1371	59.6962	43.5618	43.5618	87.5666	82.6934	85.9175	80.6283	86.3753	76.8802	54.1084	46.6169	86.3107	76.4948	94.8022	77.0828	90.6842	74.3645	87.9073
7.0667	81.0637	71.465	0.994877	82.2811	88.0434	81.136	93.2046	76.3532	76.8984	78.3425	68.9752	81.8132	90.1161	56.9887	51.6985	65.3115	75.9909	59.1682	82.6711	45.0761	71.9071	76.9083	78.9379	91.8767	62.915	99.3457	79.3062	57.5061	81.3218	84.1522	54.7022	59.9147	45.4832	45.4832	85.2647	87.0399	82.6309	81.1228	85.2678	77.6581	55.5368	44.27	85.5486	73.896	92.3894	78.6456	89.8314	71.2877	87.7832
7.2	79.9666	71.5496	1	82.2655	87.5647	75.0956	95.2672	76.5636	80.1375	76.8125	67.95	80.7078	90.5208	58.1294	51.7861	61.5829	71.4304	59.1617	84.3328	46.4427	69.1	78.3096	75.6147	90.946	62.217	97.6787	77.6109	59.1871	76.2632	79.1661	53.1444	59.58	42.4209	42.4209	82.8634	86.6464	82.1565	81.2109	86.4031	75.4505	55.3974	46.0149	84.9227	74.3461	93.9295	79.7405	87.7899	73.339	86.7076
7.3333	78.0351	71.9135	0.966813	78.9767	86.7083	75.4981	92.1525	74.9934	79.2746	81.4398	70.1602	84.9604	90.906	56.7445	52.7558	65.3181	77.031	56.6482	89.1795	46.915	74.1976	75.2806	72.8098	92.8099	63.6206	95.0301	74.8515	60.1142	79.52	76.0669	51.9908	59.3083	43.476	43.476	83.4571	92.0741	80.4531	86.1952	87.4031	76.6565	54.803	45.6813	83.8493	75.5646	93.5305	81.183	93.243	74.534	84.5924
7.4667	74.154	71.9588	0.941198	80.5884	85.7223	75.3957	91.957	75.5348	80.1367	76.2566	69.6148	84.8543	89.2781	55.2177	54.1246	68.5918	78.8895	58.6945	90.5838	49.343	84.7601	75.5425	72.2493	88.3231	60.3652	94.9002	74.5396	58.202	83.7251	78.5734	52.9915	60.2486	44.6294	44.6294	81.9813	90.5077	79.9511	85.1742	87.5318	76.07	54.0943	47.4599	86.3884	73.5957	94.0334	78.5347	91.0812	76.5094	85.7304
7.6	75.4028	72.2619	0.842596	77.5629	87.0599	74.9327	91.1423	75.9636	85.5206	74.8838	68.093	86.6314	88.9584	55.5208	55.2523	76.6085	82.064	61.7956	93.5378	51.8284	82.0084	75.1179	74.7611	89.1039	59.9813	95.0575	74.1408	59.6808	78.647	84.2564	52.778	60.3256	45.1448	45.1448	83.195	89.0549	82.6757	79.9796	89.8743	78.5196	57.3282	45.0271	84.7455	78.0626	93.5149	81.1245	90.5794	74.7785	88.4168
7.7333	75.6338	71.1487	0.832341	81.8085	92.4491	76.944	92.0305	75.6948	83.2959	77.8179	66.712	87.3383	86.0697	56.6761	56.9756	78.3326	88.6048	57.6107	91.117	51.2896	85.4278	72.0758	75.8374	85.193	58.823	93.446	75.4657	61.9107	82.1988	89.5924	52.5065	59.4358	38.3638	38.3638	83.7422	92.8739	84.6981	82.042	85.94	71.5835	56.09	44.3615	86.6581	76.0152	93.3071	80.276	97.142	72.5531	87.6596
7.8667	76.5716	67.8753	0.863462	80.1016	91.8582	79.0035	93.6074	77.3512	82.8724	80.1767	64.6662	86.0047	79.8628	57.1084	58.2626	81.6353	92.0674	61.8903	90.4085	52.3952	87.3653	75.841	77.2145	92.4975	64.2025	90.9207	80.4821	63.4989	89.5438	88.9777	53.5448	56.4354	38.3755	38.3755	85.7794	96.3126	89.9116	81.7922	84.9008	69.3498	55.3497	43.8716	89.0902	73.5588	93.4857	80.522	93.3323	73.9082	88.3674
8	77.7517	66.5952	0.854877	80.864	99.2623	77.6517	94.4817	73.3252	79.6033	74.2549	69.5063	83.6398	76.4469	52.5938	58.5681	80.5783	90.9977	64.2728	87.3467	54.9998	86.6135	73.0661	77.2046	89.6563	60.7347	87.0773	86.5639	61.1657	85.6579	90.6611	52.1089	54.5607	38.0068	38.0068	82.9071	90.5964	93.8606	82.4403	88.0854	69.6882	56.4383	44.4011	86.6477	75.9489	93.4658	79.8633	94.1132	75.2897	87.3712
8.1333	75.978	71.4893	0.823603	77.5646	95.2601	81.6176	97.1852	70.3017	82.817	72.893	71.8762	79.874	75.733	56.4183	58.6007	72.6852	93.8025	68.2989	84.3268	55.0612	87.0531	74.1929	77.5589	82.6809	48.8372	77.1241	86.4629	60.6433	90.1799	95.8803	56.7062	51.8854	39.8631	39.8631	80.0436	83.458	92.3056	85.0662	92.8117	68.4711	55.7518	44.659	87.6746	74.6728	91.4937	80.2992	97.4789	72.8835	88.5353
8.2667	72.044	71.4851	0.748936	75.523	95.1107	84.6143	96.5335	74.8014	80.3694	78.4383	70.613	79.3572	74.9093	53.6534	60.5878	67.1402	90.1708	73.2345	83.5852	60.6205	87.921	74.1772	78.5763	80.6967	50.0026	74.5381	92.3791	66.197	92.4446	91.5106	52.5665	47.9692	37.7902	37.7902	83.8413	83.1374	89.808	83.6086	89.6173	70.9455	54.776	43.6535	82.2667	71.4925	92.2254	78.6626	94.9291	73.1546	87.762
8.4	71.801	71.4624	0.690416	75.7163	96.8612	90.5576	100	69.4997	80.0911	81.6186	74.5168	72.5494	71.0505	54.5576	63.3151	65.156	92.8166	77.1131	79.2886	62.1201	91.454	73.4061	80.1316	80.2995	47.4363	67.3927	86.7325	64.1423	100	85.0102	51.5119	44.197	37.2644	37.2644	80.7985	86.8765	91.7878	80.6047	86.7466	67.3622	54.4982	43.6379	82.2409	69.7755	93.9905	76.6611	96.211	75.6176	89.0434
8.5333	71.2351	70.0706	0.648015	76.1636	96.0389	90.2557	93.1026	72.5477	81.0423	83.4731	76.7418	63.8059	68.7102	53.9835	62.8906	64.6239	91.4836	79.8589	78.234	66.1954	95.1405	77.5753	78.1614	81.2395	50.8129	67.407	87.4571	65.5759	94.9274	87.9388	53.814	41.0774	34.0527	34.0527	80.935	84.6943	94.2785	82.0812	86.8356	69.5914	54.999	45.4131	81.5408	72.4577	93.7891	74.3709	95.1185	71.5612	86.5505
8.6667	72.9956	69.9249	0.639316	76.361	98.9908	91.2278	92.5609	77.4419	83.0938	85.8847	77.7437	62.6188	66.5226	58.5698	64.2443	58.42	96.6625	87.2612	76.9341	72.3564	100	77.0773	77.3598	79.0097	49.6114	64.5566	88.118	65.2354	88.4881	84.4485	52.6938	36.574	32.0864	32.0864	80.4103	87.5572	95.8238	82.0574	84.6158	69.1647	52.7848	44.6492	85.4619	76.0301	93.154	76.6737	90.6732	72.2463	85.9164
8.8	72.0592	70.2064	0.625965	76.8852	95.101	91.3906	88.6089	81.2734	87.877	96.5156	77.0696	63.8697	63.2139	58.0664	63.8588	53.8553	100	83.1922	78.966	73.5494	98.9713	78.6379	76.4938	82.7596	49.4247	60.8471	88.6471	68.5023	92.7833	79.6514	49.9273	35.7775	33.4141	33.4141	81.8533	87.5636	95.8913	79.9626	86.0222	68.9371	54.5946	43.065	83.4692	79.1278	93.4718	77.5759	88.6078	75.5404	86.8291
8.9333	71.9035	74.7619	0.646652	79.4914	96.3108	92.0849	86.0285	84.916	90.7598	97.0196	77.2909	63.6645	57.7278	58.0787	62.0936	50.0107	98.4896	83.3847	78.8547	75.6675	95.5536	83.4713	71.6267	77.5145	50.1038	56.0017	84.9999	70.0866	87.4248	78.5135	48.9778	31.4956	34.9826	34.9826	80.2023	90.3572	92.8407	78.9655	86.1569	68.9159	54.6064	43.8953	79.6309	76.5773	94.8623	77.8692	87.1152	75.0958	87.031
9.0667	74.107	77.4996	0.686143	78.4802	96.3008	92.0808	88.0178	85.7247	87.4882	97.7155	77.3405	69.646	53.3383	60.3601	59.6428	44.8376	96.1192	84.6708	79.2269	76.6901	92.4292	84.9699	68.6731	73.5418	53.5556	52.1787	85.0205	72.4785	77.8224	77.3919	52.0425	31.6096	36.4888	36.4888	81.2515	91.6978	89.0363	81.5087	86.0524	65.5525	55.7173	46.9186	76.602	75.6653	96.6523	75.8833	87.042	73.0583	85.3151
9.2	76.2724	72.183	0.709497	76.352	97.8541	88.0647	86.5841	86.1527	85.8417	100	76.3182	70.7605	48.8448	58.0535	57.6159	44.7522	94.1593	88.0743	78.7067	78.8507	89.26	86.7364	66.2081	71.138	59.4366	51.3854	84.5233	77.0768	77.0788	78.0578	52.8653	32.1822	37.7376	37.7376	78.4423	94.3332	89.0887	79.8138	84.2782	70.5957	55.1509	44.7291	82.437	74.6666	92.0566	74.7676	93.1278	75.9255	87.3273
9.3333	78.6714	78.4217	0.763183	74.0718	98.8675	85.492	86.5053	88.9973	86.9998	97.1314	73.0733	68.3219	47.4517	56.6816	57.1428	45.4421	91.3211	89.7707	79.0001	78.7434	88.8767	92.0988	63.9539	75.2707	61.3595	50.9208	85.1999	82.5492	76.8046	72.7993	53.2225	33.3807	38.042	38.042	79.4008	88.1807	91.0502	79.7115	85.4899	69.1698	56.0485	43.1591	80.9135	73.008	94.5175	78.3013	93.7754	72.2675	85.3161
9.4667	80.341	76.4348	0.798607	73.5659	98.0746	84.123	85.5881	88.8923	86.8208	88.4467	70.8172	70.153	46.3813	58.839	57.0421	45.471	88.1521	89.3581	75.8307	75.9586	90.4718	89.4562	64.0466	74.0547	59.8901	49.9594	87.7973	84.2303	72.1864	71.9034	55.7065	33.4278	42.0743	42.0743	79.7019	87.463	90.1327	80.1506	87.5071	69.5216	59.6181	43.3051	81.0055	73.8181	90.5904	77.2349	97.8105	75.6158	84.8298
9.6	83.102	76.1847	0.873497	69.5473	98.5163	80.8539	86.3468	90.1063	83.5868	81.5394	68.2667	68.2247	45.7601	61.5587	59.4198	45.2975	84.3127	80.8821	73.153	76.4297	90.104	90.1643	66.192	73.34	62.1004	53.5568	81.7671	86.7559	70.8097	75.6795		33.435	42.8222	42.8222	73.9432	90.5362	87.9917	77.7798	84.9654	65.7115	56.6906	45.3974	76.252	73.676	92.8297	76.8388	100	75.2157	82.3356
9.7333	77.9384	73.701	0.896434	71.9515	96.6525	76.252	85.1628	88.6084	84.8534	75.547	63.7928	70.0114	45.7546	60.4441	58.9847	44.1857	81.551	80.8419	71.3084	72.9616	91.4896	92.6556	69.2549	78.445	64.597	57.5921	82.2741	88.5082	69.4214	73.0586		34.2034	47.3768	47.3768	79.3329	88.8093	83.8478	78.5578	85.8636	65.9589	56.6669	44.6966	75.615	74.0701	91.3078	75.4231	94.053	71.6035	85.18
9.8667	75.2037	71.0394	0.931561	73.8978	96.0695	73.7517	83.4656	83.9729	83.0099	72.102	63.7542	73.1421	44.8896	65.2713	61.072	44.107	76.825	82.2941	71.0769	65.4334	93.3888		70.4265	77.3341	65.6499	61.3238	78.4077	90.063	66.5849	74.4383		35.6662	48.7116	48.7116	79.31	86.2176	82.24	79.1256	82.665	70.6122	55.7795	46.0697	81.9666	73.3783	92.3138	75.0307	92.7595	71.9793	88.7762
10	75.588	68.0828	0.907685	76.9007	95.3954	75.5398	81.9048	85.2903	79.5573	71.8345	63.1813	76.8499	46.5214	67.1412														89.6084	63.8076	69.9977		38.7905	41.9188	41.9188	77.0276		79.1927	80.762	82.6462	68.5589	55.7138	47.6702	77.0252
10.1333		70.1467
[truncated: 80 more columns]

## Sheet: Figure 6F
wildtype	odr-1	tub-1	tub-1; odr-1
0.0264096	1.17308	0.0374605	0.388062
0.0302304	0.494911	0.00871436	0.23044
0.0157717	0.648774	0.0279057	0.230491
0.0459541	2.07366	0.0527381	0.416273
0.0201324	1.64142	0.00023866	0.264751
0.051707	0.201603	0.032626	1.70648
0.0286272	0.859089	0.00921825	0.202351
0.0213366	0.447647	-0.0056432	0.0404208
0.0293176	0.264009	0.0277089	0.0684747
0.152967	0.175675	0.0367921	0.408731
0.0150441	1.93614	0.0212038	0.141999
0.0309877	0.841623	0.0482835	0.197148
0.0606984	4.21734	0.0195928	0.296437
0.0182057	0.950965	0.102982	0.299366
0.0958248	1.64511	0.0459133	0.269191
0.049242	0.843578	0.0251363	0.165184
0.0134022	0.194354	0.0499148	0.162249
0.10102	1.24181	0.0201999	0.335918
0.0484858	0.137209	0.11995	0.201847
0.0307967	0.0443882	0.0318625	0.0360402
0.031372	0.191385	0.04041	0.318349
0.0355601	0.753245	0.0457992	0.28251
0.0282476	2.21147	0.0391132	0.146354
0.0253919	3.0691	0.037335	0.172381
0.0338121	0.802919	0.0456184	0.340701
0.0231052	1.55521	0.0222695	0.271314
0.0116391	1.17752	0.0274124	0.75351
0.105781	1.02552	0.0452232	0.379081
0.17188	2.77346	0.0688147	5.30107
0.0502178	1.72303	0.047937	0.306113
0.0685398		0.0435728	0.201228
0.0191261
0.103759
0.0546926
0.0126406
0.0474965
0.0341437

## Sheet: Figure S6-1
Distance from cilia base	wildtype																																								tub-1
0	35.3089	42.7575	41.9796	26.2763	17.6062	46.8119	30.9521	10.33	19.2586	14.9406	30.2521	25.2552	52.1039	34.0851	32.3581	28.5952	28.8714	14.2908	21.7173	26.0317	34.9862	47.181	22.8541	25.3357	26.5178	31.4348	39.8102														9.91799	12.9856	12.5468	6.80856	12.6162	21.5738	20.0922	17.6994	28.1841
0.1333	40.4445	43.7484	51.0502	34.7746	22.6777	51.8005	38.8285	10.392	26.9853	22.9948	40.1696	30.3053	55.112	45.499	41.4919	39.0425	40.0325	23.498	27.9154	34.9189	47.4908	54.7213	22.7186	29.9407	34.8389	36.4224	51.9863														11.6047	14.6967	14.5454	7.65798	12.9828	22.3924	22.3392	18.9155	31.1204
0.2667	41.7886	42.8158	58.3205	42.9941	31.6015	50.4169	44.6386	9.91034	37.7149	33.2501	48.1319	36.3214	54.7359	47.8774	44.7325	44.7465	49.2433	33.6357	36.5133	41.5169	55.1541	54.5111	22.824	35.9211	40.5686	38.0351	54.8429														13.7334	17.4996	16.2663	8.70319	14.4568	22.7384	23.7155	24.1722	32.989
0.4	39.6529	44.1122	58.3692	46.9431	42.133	50.467	45.1601	11.8136	48.8625	39.9504	55.1812	40.3266	54.9334	50.032	45.6629	48.9061	51.0916	42.1061	46.373	44.3174	55.1825	55.6607	23.0699	42.2691	41.597	40.3447	55.6479														15.0036	19.7176	17.3405	9.9876	14.6859	24.1787	22.2551	25.6875	33.2796
0.5333	41.1928	40.9715	57.8772	46.302	48.3399	50.9436	42.6374	14.986	55.1269	44.6594	51.5158	44.9457	56.1343	51.5899	49.5023	51.263	46.844	47.8544	57.7852	45.179	54.3043	58.4846	22.1164	46.4513	39.7788	38.5844	55.4911														15.6047	20.6104	17.5967	10.8614	14.5988	23.3957	25.0973	28.103	33.5845
0.6667	44.9505	40.5427	57.0549	42.9015	49.75	49.9699	44.1189	14.8988	56.8663	42.7021	52.0327	44.9718	53.7086	48.2408	66.7596	53.958	47.7276	47.3693	66.5348	47.4819	52.7573	61.6843	21.9458	48.6398	40.8585	38.2004	54.5966														16.17	20.7864	18.6329	11.6046	15.2441	22.1522	25.2633	27.7284	34.1353
0.8	47.1167	40.8237	55.6511	41.0164	49.012	50.191	44.1461	14.7879	55.0291	44.7842	52.3936	43.8879	51.6863	44.7885	88.4772	52.5486	49.004	44.8459	67.9739	50.4593	48.508	63.1737	23.5467	46.5576	42.8272	37.3483	64.7507														16.2822	21.3791	18.8429	13.2936	14.2084	22.6534	25.0032	29.1588	34.1565
0.9333	46.9797	47.2219	60.127	41.5839	48.065	52.8793	44.5267	14.6241	54.9099	46.8251	54.7472	47.0507	52.7942	43.4125	98.8698	52.5117	50.0345	45.063	72.7494	49.9049	50.0726	68.8052	22.4978	45.7402	40.4136	39.0628	78.0125														15.3302	21.9194	19.3635	13.439	13.676	22.3084	24.4329	30.0579	33.9941
1.0667	45.4918	55.8038	67.1338	40.4432	50.1347	54.4301	50.52	15.1462	54.8945	49.6526	57.8739	54.0719	57.9823	44.3008	90.0486	52.0781	53.5429	44.1283	71.6802	49.8617	47.5106	75.2099	23.9984	44.9909	37.3279	39.1915	75.2615														14.3183	21.1734	20.1562	13.8786	13.9787	22.9173	24.076	29.6728	34.2165
1.2	46.9477	64.3402	76.6368	40.1384	51.5389	54.6859	59.8	14.4297	57.0954	58.807	62.0026	62.787	65.4059	45.9985	74.5174	50.1724	56.6659	44.172	72.5947	48.8833	45.0574	73.6759	30.5174	47.1979	36.4217	40.662	76.4192														14.7535	20.2742	19.9371	14.6672	13.8893	22.7528	23.8531	29.2494	31.0695
1.3333	51.0268	72.4974	85.531	42.6428	55.533	61.9962	66.0646	14.0002	57.949	68.7916	66.1742	68.4018	69.4461	44.7035	66.6433	42.8103	61.1444	45.944	75.641	56.5325	46.7193	73.6175	31.2701	48.6447	35.8555	43.0204	77.2902														14.9394	20.7184	21.0142	15.497	13.2499	22.4831	24.1807	31.038	30.9857
1.4667	51.0446	79.1571	95.2739	44.1954	64.2931	74.7183	72.8493	12.9031	61.1654	77.924	71.2439	65.365	74.6106	43.8232	61.6629	47.314	70.33	47.7257	83.4127	73.8555	53.125	67.6632	37.3475	57.14	35.218	52.1402	83.2881														15.6729	20.1106	23.1679	16.0522	13.4275	21.7543	25.4616	30.802	31.1256
1.6	56.5739	84.5236	100	47.1719	78.1486	91.71	78.4522	13.4448	71.0252	88.0591	78.5533	68.2491	76.6579	45.2695	58.5214	54.2553	80.4878	48.7856	93.9414	87.7705	54.7573	65.8589	39.5857	61.7646	36.1264	58.2647	82.9852														16.2948	20.5342	26.2305	17.2249	13.5553	22.5031	30.0449	32.6988	30.3756
1.7333	65.6856	86.3886	99.4085	54.0718	92.2862	99.401	79.3285	17.9205	82.7747	90.1574	83.8829	69.5696	76.5685	51.6917	58.2382	61.4573	90.8623	56.4582	98.6745	90.2978	62.2388	62.5055	43.0134	67.242	39.4036	69.7144	81.2112														16.3569	18.7902	30.289	20.4095	13.4779	23.3807	32.303	32.4624	31.4111
1.8667	70.5273	87.3507	95.2933	59.5618	99.67	97.6541	78.7392	25.2478	87.8163	98.5311	85.1465	70.8053	73.235	65.2916	57.9833	66.2487	100	68.0327	100	93.4437	70.1135	71.3205	45.5126	68.3844	48.2137	78.9063	77.1838														18.297	18.0361	33.3234	25.7007	15.5445	25.1538	34.2351	33.198	34.9484
2	82.3632	96.2451	93.8717	65.2583	100	95.6329	77.6993	33.8275	95.3455	100	85.5454	75.4603	71.8946	75.9106	55.2973	74.5692	99.826	76.3992	97.1274	91.6687	75.4517	88.5873	43.1288	66.9194	54.2889	84.9002	74.8481														18.4312	18.071	36.6066	32.4916	16.8455	28.0569	41.866	32.1339	36.9089
2.1333	81.4765	99.4917	88.2651	70.2822	99.4706	94.2482	78.497	39.4553	100	94.9327	79.9894	78.3092	71.3029	79.939	58.2589	82.0927	96.8131	75.2679	94.0968	91.9472	78.3508	99.162	42.0509	72.5908	58.9485	85.4028	75.5526														21.2537	17.9565	38.0084	39.4343	19.7992	33.3151	48.8352	32.6069	39.0065
2.2667	80.9325	98.4242	88.7756	76.0891	97.0015	96.241	81.4159	39.4664	99.3565	90.5941	77.2043	78.3723	74.0018	77.7847	61.9488	91.0798	92.4383	79.4839	88.5437	98.4516	81.7871	97.2876	44.0843	74.9195	62.4854	88.0752	76.5607														23.9197	19.0454	38.5637	44.4575	22.6331	37.6315	57.3246	33.605	37.8535
2.4	75.8683	99.9014	87.1837	83.0285	94.4476	94.4919	84.6854	38.2392	98.5804	88.7552	77.4408	81.5427	75.4365	79.2778	67.3198	86.8736	93.4169	80.2261	84.7314	100	74.7513	92.5455	44.2829	81.6014	65.4884	82.0745	76.4518														25.4834	21.8643	39.6352	47.2672	23.1608	44.7919	65.1831	34.4158	38.3058
2.5333	82.2908	100	85.2241	86.432	98.1783	91.3276	84.7831	38.87	92.128	84.9996	78.1855	84.3793	75.2669	80.0986	71.9826	88.0192	92.9993	84.6266	85.2548	96.4848	73.8003	92.4334	45.8739	81.2193	71.8271	82.1349	77.5765														26.8702	21.5111	41.8017	47.6152	22.6148	54.4864	75.4899	35.4603	41.24
2.6667	80.1422	99.0872	83.8591	82.7711	98.5196	90.3844	85.4137	39.9324	90.4763	80.9822	76.2478	86.7568	79.1672	81.6254	74.0396	94.1122	92.4342	88.843	83.155	95.1264	74.5932	96.0834	45.5759	86.2309	71.6194	82.3958	81.71														31.861	21.5457	45.5805	47.0823	20.5654	63.9541	76.1351	40.0931	43.0923
2.8	85.1693	97.3029	84.4921	86.0564	95.7822	83.5907	83.9231	41.2664	90.9742	79.9757	77.8697	83.4108	80.7833	85.5009	79.5198	94.5934	88.4797	89.0716	86.3853	92.8938	76.8743	95.5011	44.9828	87.9966	73.9896	82.6993	80.7369														38.1396	26.0518	51.5492	48.3594	20.4189	72.4705	83.4829	44.3532	45.0934
2.9333	86.5667	91.4956	86.5635	88.218	93.7426	79.8277	86.0828	41.4264	94.0312	79.1191	77.4279	85.068	85.3515	87.3571	83.2819	93.4475	85.6169	92.6995	91.5032	88.4731	78.5634	100	44.82	90.6141	80.1331	82.5307	87.0137														44.7368	30.9547	56.7065	49.1542	19.4178	77.0834	82.2649	49.5408	48.9786
3.0667	82.9001	87.977	86.5949	85.671	88.5334	77.655	85.241	40.6196	93.2868	77.4051	77.8457	88.5299	90.251	85.7398	82.7583	94.896	85.1746	94.0313	93.9687	90.4595	81.4858	98.2694	45.0325	95.0266	82.1333	81.4729	90.5778														49.0696	45.6151	61.2805	48.6973	18.8457	82.6581	76.3048	56.4999	49.7637
3.2	85.8057	90.673	86.4315	88.8072	86.2884	77.3281	87.5094	41.2905	94.2296	78.2186	74.5849	85.0932	89.6553	87.437	84.4501	99.1147	81.1856	85.6046	93.3992	85.443	86.9708	99.185	46.2959	97.4625	85.7471	80.1927	95.3579														58.0258	65.2316	64.2568	46.5529	19.522	88.7913	75.0873	69.0897	52.2916
3.3333	82.682	89.8166	86.6131	93.3628	86.314	73.9166	92.5447	45.3285	88.6739	77.9894	70.45	84.5659	91.673	88.6577	90.7865	100	80.381	86.0423	94.5799	81.0064	87.7819	90.1824	46.6129	100	85.9393	80.5415	98.7115														77.7319	85.9574	65.3311	48.104	21.1557	90.4192	77.2692	80.0297	53.5909
3.4667	86.4568	89.3977	84.5886	96.0883	87.0454	75.3294	95.736	51.3104	85.3038	80.334	63.5378	87.0485	92.4425	87.7094	97.4876	96.2266	80.1675	83.425	95.2876	82.1031	83.0094	88.0922	46.5045	98.9375	83.6812	82.2044	100														97.7626	96.0679	65.0423	47.3794	22.9876	90.4856	79.6954	84.0322	56.4909
3.6	91.2504	91.1216	81.822	96.6353	84.7748	74.5238	100	60.8771	82.5345	80.3459	60.8213	84.7245	86.4963	90.0569	97.7325	93.3109	79.0164	85.2496	90.7579	83.2433	82.7942	84.5494	44.8841	93.4922	83.0663	81.1453	99.4148														100	96.3318	62.0229	48.1779	30.2892	90.7668	82.071	88.5111	66.0407
3.7333	89.7202	93.7379	81.5013	95.5254	84.6972	77.4009	97.542	71.5176	86.2994	85.8415	59.7626	83.5949	84.4706	92.3908	100	96.1659	80.5767	83.4476	90.1702	84.7229	85.3685	83.1505	42.9935	94.7851	87.021	82.133	93.0591														93.3287	93.4218	62.5242	47.7262	37.8844	91.6663	85.0053	88.6792	71.5936
3.8667	87.535	91.3253	80.3936	91.4231	80.8042	79.2749	98.2882	77.5122	84.3516	86.9533	59.9672	85.8265	85.6358	90.9615	80.6902	85.8588	81.0069	84.0986	92.4175	79.8432	84.4241	86.3209	42.8073	98.3353	86.5092	85.424	91.8942														82.0369	84.8066	62.029	46.4289	50.9718	92.8322	84.7632	87.5835	76.7756
4	80.5539	89.1688	81.8757	93.7161	78.3249	80.7321	94.281	82.041	81.6136	88.18	60.1765	86.0465	88.03	90.3974	65.4745	84.6275	85.3112	84.2652	96.1533	77.6327	83.4217	81.3625	43.1818	95.3737	82.6675	88.1163	87.8128														75.3184	76.3591	61.1846	45.7919	56.7205	100	81.0238	89.0354	78.4243
4.1333	81.6905	85.4534	84.2083	96.9441	79.4946	82.895	94.0335	81.0849	78.9529	91.3091	60.4773	87.8589	88.5133	90.9176	59.4011	82.5332	87.7089	83.9315	97.8134	78.7333	83.0076	78.5097	42.7948	91.3998	83.964	87.753	81.921														73.8746	67.898	59.8746	47.7146	56.1467	96.946	86.5151	85.3602	78.0117
4.2667	80.9955	82.3065	86.7239	97.7271	76.5065	82.194	90.0876	79.0885	78.3023	89.3872	58.5136	88.6154	90.2138	90.894	54.2487	81.5548	89.7824	85.2973	95.0462	80.3916	84.0225	72.5164	43.7724	90.9766	86.0105	88.09	78.3523														72.5733	63.7368	61.6204	48.4679	55.0532	98.9198	98.0417	82.9405	76.6119
4.4	87.2443	83.3943	91.7125	100	76.9328	85.6353	92.9539	82.3896	76.3351	90.966	58.214	89.3017	90.2294	89.4272	50.8229	83.2684	88.9495	86.2955	96.58	79.8359	86.5795	67.4995	43.0714	88.1481	85.3988	87.448	73.8444														71.2238	61.4937	65.5143	50.8926	56.138	93.5398	100	81.536	78.9958
4.5333	90.0847	80.91	90.4177	92.8886	77.7603	82.5427	92.4609	85.952	78.0155	92.7796	60.1739	89.0243	85.7746	85.659	49.6009	79.7284	90.8313	83.1239	93.5872	84.5043	89.4432	65.3882	41.2859	93.4785	84.5764	85.4396	72.5154														71.2789	60.0633	65.813	53.4336	59.0331	91.4694	96.1631	82.1035	78.7658
4.6667	90.6545	80.4251	87.2533	93.0939	77.7729	81.3784	93.735	81.2584	81.0753	92.6735	58.7612	86.3418	84.0322	81.6535	50.5209	77.5306	92.4348	84.6978	87.8977	86.5227	80.4596	67.0621	40.6475	95.2346	80.648	84.9819	74.2224														74.6345	66.9273	65.1159	53.4045	60.4142	84.1095	93.8836	88.1595	79.9174
4.8	93.6189	77.3438	85.6543	92.4857	72.3697	83.9137	91.9731	86.2048	82.5711	90.2286	52.8817	87.4847	81.9022	80.73	51.5176	76.201	94.8377	83.3392	85.2877	89.8387	78.042	68.9592	40.5706	94.8965	78.1771	82.6116	75.2644														72.7849	69.0468	68.4715	54.2997	61.0313	78.6042	90.2826	93.2775	79.3475
4.9333	99.4214	77.4237	83.9218	87.0114	73.9525	83.9861	90.5044	89.2463	79.8233	90.8776	52.3978	82.9994	79.4783	79.3093	52.7149	77.7785	95.139	79.7293	81.8387	95.853	77.1623	68.5741	41.7361	89.5913	77.5536	81.1297	75.2862														75.1449	72.1531	75.6877	54.2484	58.1125	78.7014	86.5061	93.5243	77.9955
5.0667	89.9755	74.86	82.6655	86.7917	71.5542	85.0989	85.8344	89.9011	78.0416	88.7936	51.3056	85.1086	77.5689	80.2855	53.3432	80.4886	96.4586	77.4684	84.1188	99.1248	80.4296	69.2278	43.858	86.1649	75.4735	79.219	74.6915														76.4352	72.6525	84.9351	58.842	58.6557	74.8417	84.534	96.2032	79.2541
5.2	89.8759	71.3335	77.1877	88.9199	68.9024	82.9379	88.8369	91.7321	80.4244	85.8341	51.2432	88.2275	77.884	79.9085	55.8496	85.9564	97.1482	75.5168	88.7304	94.3477	75.4718	63.5883	43.8874	82.8702	74.7945	83.378	73.0933														75.3873	68.9425	88.3831	68.7355	57.5959	73.4236	79.1049	96.0148	82.5891
5.3333	91.4408	72.6027	67.5911	89.3957	70.2539	80.2142	84.4943	96.3567	81.8067	83.962	49.9682	90.0124	75.5822	81.6198	57.4537	85.9352	93.4589	73.4856	93.3746	92.5194	71.5325	53.2865	46.142	84.0798	74.8544	83.3598	73.145														76.0513	64.9347	89.7011	79.6729	58.5368	71.3962	78.7564	100	80.1205
5.4667	92.6181	71.2137	59.5931	86.3573	66.0907	80.2979	86.3336	97.0334	77.3154	82.6952	49.2237	93.097	74.0478	84.5372	59.236	84.455	92.8393	74.0377	94.5302	85.4224	68.5644	49.1206	44.8611	85.0657	75.8784	78.7648	72.6062														76.459	64.8853	92.6439	89.7629	57.6085	68.4523	69.9481	97.2048	79.5335
5.6	91.6912	75.2358	58.0939	88.4784	64.4146	75.1014	83.2439	99.5446	78.8496	82.9324	50.7048	86.8104	77.8941	89.5005	60.014	88.2279	90.4153	76.4128	91.5973	77.6848	70.8031	44.482	44.563	86.9957	75.7085	81.0991	72.4239														74.6106	70.0906	91.2451	96.7412	56.4717	69.0923	64.1259	91.8973	85.0855
5.7333	92.5947	78.2342	56.4319	86.0909	62.4586	71.3789	90.724	100	79.1585	80.2528	49.0361	89.255	73.9168	86.9513	60.6398	81.2751	86.3012	78.2653	88.2142	74.3795	71.3736	42.8576	42.0004	87.3969	74.1305	80.0676	72.6242														74.3044	74.661	88.1979	97.1287	54.9154	67.4251	67.7621	94.2149	81.8702
5.8667	94.3258	83.8023	59.3277	80.749	59.6589	67.4643	84.1228	99.2154	75.4885	79.9514	54.0509	92.6623	73.2713	90.2191	60.4591	79.6525	85.0904	81.6652	90.7592	70.6331	71.8135	42.3074	40.0408	83.2723	75.6131	80.6414	72.8107														74.4011	74.1758	84.705	92.2823	54.2343	70.3087	64.202	92.6181	81.0338
6	98.8356	79.7455	60.047	80.9021	56.3793	62.5035	83.6512	99.6848	70.8181	81.0354	55.1707	93.1782	76.8388	92.7108	57.9949	81.0955	82.9464	81.872	90.9781	72.2911	72.8382	43.2489	39.2941	81.4149	80.5588	78.8285	72.3166														73.2524	73.4108	78.1166	90.1524	55.7803	69.0416	63.1823	90.9576	83.3561
6.1333	98.2803	80.6439	62.7303	82.5212	58.7115	62.7077	77.0612	96.266	67.689	79.7641	56.3397	96.1486	75.1646	92.849	56.593	77.5846	76.0352	81.2804	86.5471	71.0832	75.4504	43.3629	42.0814	76.5956	87.3275	75.418	69.3556														68.5775	78.2756	76.479	91.3974	56.9787	64.2519	64.9684	88.5346	88.8392
6.2667	92.8672	82.9786	66.2183	83.8525	59.5397	67.8773	73.0099	94.4421	68.0966	79.728	53.0137	98.4914	78.7878	92.4177	59.8186	75.9099	72.3403	82.4803	88.1605	71.1358	74.8783	42.8998	41.5514	69.4416	88.6816	74.4989	66.3871														68.0431	79.1222	76.0955	91.3454	55.4713	62.2405	68.6888	82.577	92.8674
6.4	88.7528	77.1191	67.0686	85.4643	62.7897	69.2813	67.2928	89.9415	67.6884	81.114	51.6948	99.6137	85.9107	100	61.434	78.4606	71.9476	84.3814	87.9737	76.5801	75.3278	43.4757	42.7367	69.5185	89.7672	74.4099	68.6051														69.0988	78.2014	72.9886	91.1494	57.7085	58.9288	69.2518	75.5494	94.0968
6.5333	85.0914	73.0385	62.555	86.32	66.5972	71.5715	69.1718	92.0285	65.8263	79.2094	51.7692	99.8429	93.6629	97.5362	62.7635	80.947	67.932	88.0946	84.8074	78.347	73.0518	45.692	44.4881	71.3404	88.0702	74.9156	69.917														71.5369	77.6074	72.6533	92.9113	55.7179	58.9305	71.0048	73.229	91.4539
6.6667	81.6919	74.3233	55.6305	88.248	64.0936	78.6522	69.1583	87.3915	67.7338	79.3859	54.8327	100	100	96.1975	64.0452	83.7591	61.0087	89.6554	82.9039	81.4379	69.627	44.5415	46.5847	73.0489	88.6118	74.9761	65.3501														73.7374	75.9815	72.6567	93.4258	54.6578	59.7522	69.2067	68.9875	94.2414
6.8	78.9579	75.6517	52.1344	87.3751	62.2565	85.1325	69.1861	86.1724	69.0458	79.1365	51.6804	95.8882	98.6733	95.4115	62.3789	81.9326	59.6947	87.3403	83.6066	80.2705	65.7686	43.0968	52.2437	74.8726	82.5569	77.4566	65.3352														76.3341	79.6892	75.4449	96.352	57.3324	57.2087	73.9477	62.299	92.4687
6.9333	79.8484	74.9281	50.6075	86.9771	62.9578	90.6726	76.2743	86.4292	69.2383	78.8153	54.6196	85.7731	97.9186	90.1066	60.8978	83.0976	59.161	83.8396	81.1788	88.4135	64.289	43.1192	54.7785	82.1849	85.1117	79.5367	65.8174														78.4775	76.8306	81.8922	100	54.2658	58.3849	76.4908	60.4659	88.8456
7.0667	78.8868	76.7168	53.4349	87.1371	61.7692	94.3702	78.0702	87.2216	72.7621	79.3377	50.3457	78.1406	91.1915	90.6946	57.6419	82.0683	57.9664	85.2578	85.4807	86.5721	63.9227	39.3003	58.9207	89.2561	86.3204	80.6983	62.3667														82.6369	72.7322	88.272	96.5464	54.7874	57.4865	80.8757	59.2882	87.4252
7.2	79.9791	79.8955	56.576	86.9187	62.9338	100	79.4322	83.7494	75.607	83.0496	53.0082	72.4216	83.2996	85.986	57.2219	86.0062	62.2361	91.0085	77.3999	86.6922	62.994	36.8422	64.5597	86.8171	87.194	81.5661	58.6366														85.45	71.9219	94.8126	97.8606	55.5893	63.4355	83.8328	56.1281	89.674
7.3333	84.8221	79.4872	57.2688	88.1003	62.0703	94.0341	81.2306	79.9311	76.5134	85.0822	54.9361	65.6885	78.3882	87.5566	57.1057	86.65	61.3815	96.0025	77.6268	87.3524	59.4701	32.4231	64.4705	92.0872	88.0495	82.8324	56.1237														88.1923	72.5939	97.1382	92.4175	56.2165	72.1375	80.2775	54.6407	87.2231
7.4667	85.1841	79.6997	54.6967	86.3452	59.577	91.218	82.2475	84.272	77.5225	86.1786	58.1958	61.7978	75.1339	85.8085	62.2578	83.9921	64.0461	100	79.3633	89.0909	55.7192	31.9749	62.7863	90.2729	87.6127	83.165	62.111														89.1164	75.2237	95.8039	90.8889	58.7116	78.8514	79.6023	51.2784	95.4477
7.6	85.9674	77.6581	52.3717	88.8737	56.6527	84.5149	85.3538	83.7872	79.0203	86.9772	59.8149	58.1216	78.0893	83.8953	74.0343	85.5542	63.0663	99.7391	79.5673	88.5715	58.0809	29.3607	65.7497	86.0083	87.4267	85.7927	61.3746														89.5764	76.063	96.0328	88.2323	62.8322	77.8128	82.287	44.7583	92.3941
7.7333	89.2369	78.7913	50.7324	83.8626	55.348	80.7482	87.9068	82.6781	79.1381	87.3079	68.6107	57.7844	81.6627	82.8838	78.2651	86.0345	61.6339	98.4158	81.0583	91.3059	62.7407	29.3642	71.3016	88.6663	90.0351	87.1525	63.9441														88.9106	80.7848	100	88.2949	66.3177	77.0585	81.4801	45.5573	89.0739
7.8667	90.907	79.0629	51.1925	80.4932	53.7998	73.3569	84.6459	78.5782	80.0113	88.5863	67.3882	56.6404	85.4026	76.299	85.6605	83.4471	58.5984	98.0222	81.1246	88.1225	63.8156	30.5921	77.8941	90.4314	90.4451	85.6175	61.8441														91.7358	85.8722	99.1338	89.4321	70.9507	74.7145	83.1929	44.6767	87.7195
8	95.1446	76.4139	53.0067	77.4239	51.9131	70.5724	83.2105	75.926	81.3574	86.9115	73.5301	54.721	85.2707	72.0393	91.8945	81.7467	53.4704	97.7266	82.0267	90.0357	67.6949	32.1329	83.689	89.1187	87.9198	85.0169	57.4032														96.0798	86.2764	89.2766	87.1851	66.8433	75.0035	84.1104	43.8596	87.0486
8.1333	100	76.6947	56.6935	76.5094	57.3672	71.3037	84.0774	74.7076	82.3452	86.7498	72.9366	54.5362	82.2281	71.7567	89.0902	77.509	49.6071	97.5372	81.7513	92.2369	72.8106	34.7526	88.1846	84.5336	87.7928	86.19	52.0273														91.1018	88.4923	72.2666	92.0234	62.3674	71.2529	83.6122	44.0034	92.5651
8.2667	95.7438	77.9325	50.7011	79.3496	58.7984	74.4018	83.7183	73.9756	83.3154	87.9442	74.9907	49.5249	78.633	65.0196	85.5639	76.3766	45.1197	94.723	81.9346	91.7729	74.8453	35.255	94.5143	86.8854	90.7524	88.6755	55.0608														90.8707	91.7676	62.01	96.3477	61.9136	72.1542	82.844	46.0835	90.6016
8.4	98.2265	73.8461	51.3032	84.4113	61.622	76.9442	86.8599	74.1676	85.1287	91.5692	77.9066	47.731	71.0747	66.6029	79.5575	72.6361	41.6578	87.5472	80.2782	98.5291	77.1198	36.0409	96.9004	92.1502	96.3888	87.3619	48.6995														88.4399	88.9971	59.333	98.2796	63.5608	74.1375	79.71	47.1652	94.3862
8.5333	97.5862	67.8588	51.1836	88.3475	56.5628	84.3085	82.0761	72.0427	84.4393	93.0925	78.6277	45.5187	64.636	68.1456	79.3428	69.4357	43.2529	80.602	82.3196	94.3766	80.8457	38.4667	97.3542	90.3576	95.8329	86.8573	55.3322														81.9463	90.8894	62.1848	96.213	61.5439	71.6071	78.3364	51.7775	91.9421
8.6667	95.8362	62.8927	52.509	90.5133	57.3257	87.5711	85.4306	71.5538	81.4377	90.6337	84.9323	41.9571	62.3616	71.9957	78.5731	69.4674	44.8242	73.5293	81.0053	90.8815	83.3515	36.1702	99.9477	86.8051	95.3212	89.4189	56.3961														75.6384	96.8039	65.4217	95.8348	64.2237	73.5124	77.4735	53.7119	92.6984
8.8	94.2107	65.253	54.5748	93.169	59.3418	92.6683	83.1083	72.3357	83.2294	88.8481	92.453	41.2557	60.0735	64.1045	82.1042	73.8435	43.2239	67.9113	79.5611	84.7845	86.7063	35.7446	100	89.9659	95.7317	91.0868	55.0927														75.1129	100	64.6099	94.645	61.8891	67.8111	74.9696	56.0884	97.662
8.9333	92.201	58.5581	59.5617	95.5727	58.3809	95.9831	84.2648	68.5158	80.5915	88.1451	92.591	41.2783	61.2755	64.6507	79.999	77.4646	43.8213	66.8189	77.8147	80.4909	91.4631	34.3254	97.5864	87.3328	91.6085	94.0861	55.1056														76.9148	99.8143	65.6459	90.5067	62.2884	64.3414	78.6164	63.706	100
9.0667	92.5747	55.376	68.065	93.9814	60.5382	97.7845	88.562	69.5158	77.5172	87.4083	96.1118	41.5072	64.9278	65.4666	76.3786	79.4102	46.9453	68.5454	79.0916	79.5067	99.3811	33.3903	95.1907	89.1598	89.9217	94.6633	51.6871														82.2216	99.8809	66.8176	80.8075	59.4397	60.9682	78.1031	58.4782	98.1497
9.2	85.3694	50.9772	68.2231	91.921	64.3436	89.28	88.6474	72.3458	77.3645	90.035	100	40.4648	66.6354	63.1438	72.3652	81.0735	51.5338	68.3134	77.9492	79.4597	99.9259	31.5176	94.1046	88.105	91.4111	90.4832	52.66														87.0413	98.9411	68.933	67.945	56.975	61.8715	78.9233	61.5614	91.7332
9.3333	81.7477	47.8225	72.9254	89.6891	68.7217	88.807	88.4015	75.7161	77.4624	91.5818	94.9456	43.3535	66.8907	60.7608	66.5497	82.13	53.7914	65.9517	80.6932	80.4933	100	32.2438	96.9441	87.6403	89.5084	86.8992	60.66														87.822	95.9034	68.2637	59.4404	56.096	62.269	81.712	59.2396	86.8321
9.4667	85.5859	45.3975	74.4512	86.8193	68.8255	80.6969	86.0498	75.3274	77.2749	90.3582	93.4509	38.0077	69.2785	61.9684	59.9532	81.317	58.3942	60.5988	82.8349	78.4352	94.3461	30.5538	94.3315	81.9031	88.2437	86.4404	63.5145														88.1132	91.6787	69.6329	53.1826	59.699	66.7699	78.0374	59.8978	87.3641
9.6	87.2756	47.0058	79.2823	86.1074	66.8315	76.3979	84.1267	75.8905	79.5275	85.953	89.5392	38.5641	68.9835	62.2566	54.9812	82.4236	66.8181	54.9066	87.1615	73.9509	94.1758	31.7559	91.8927	76.8207	86.108	84.2657	67.4989														90.2791	87.7699	72.6529	50.7441	60.5694	60.9515	81.1218	58.0467	90.3395
9.7333	88.0826	47.562	74.3158	86.8905	64.8686	76.312	84.8203	73.3641	77.6565	79.6158	85.0839	37.7678	68.8874	62.8912	49.2645	86.6022	71.8159	47.9884	91.9931	73.0145	85.7693	30.4234	88.7953	76.7475	88.3	84.2432	67.8121														87.4548	84.6155	75.3916	51.9948	60.4301	61.7515	77.7252	59.4105	91.722
9.8667	90.6523	49.7972	73.2871	85.002	57.0015	82.0684	81.468	71.8628	81.1035	73.7597	81.8581	39.6773	67.2071	58.9168	44.3974	86.1819	82.5265	42.2969	94.5773	73.445	81.5383	28.4032	88.062	69.9357	92.4684	84.7283	64.7252														82.9595	84.6065	76.9452	52.6713	62.0381	56.8214	80.3016	52.6836	93.1614
10	90.985	46.7599	75.139	89.948	57.0794	89.2035	79.2482	66.6607	86.1584	68.9758	79.8485	40.7929	62.7244	59.0198	41.8934	87.3075	86.8582	37.3991	95.526	72.2121	83.813	26.231	84.5543	77.6261	96.2063	83.642	65.3155														78.5699	81.8014	75.3639	53.8945	60.4377	55.2183	82.7751	54.9687	93.6831
[truncated: 57 more columns]

## Sheet: Figure S6-2B
Distance from cilia base	wildtype																																			tub-1
0	84.3542	62.575	50.6676	83.5985	85.9877	71.5409	50.2866	77.4458	93.5018	76.4828	34.5397	46.6833	61.8862	27.939	51.452	80.2941	38.69	54.0003	68.2177	82.0328	57.7469	31.5481	38.1852	79.1282	59.9899	89.3983	49.6171	42.4051	26.2082	55.9344	84.1636	38.7467	72.3216			60.2609	56.2542	23.9816	35.3175	34.2521	37.6177	72.3254	42.4081	39	37.1716	35.6251	55.6123	76.4244	53.2428
0.1333	85.0403	64.5678	54.6927	84.7912	87.0682	73.7807	54.0024	82.3828	91.4276	78.6963	36.2394	48.2675	67.5617	30.9215	52.7121	81.8417	45.5098	62.0696	71.4039	91.5492	60.1558	34.154	41.9836	86.1128	63.7126	91.3319	53.7715	44.654	29.1776	61.7724	90.0106	49.5568	74.5696			60.6247	63.9907	26.1596	43.476	41.9593	39.0789	78.2866	44.229	42.221	41.3626	36.9483	61.5183	84.4676	57.1117
0.2667	85.2265	68.1818	59.5958	85.404	90.2385	78.1395	59.2926	89.8125	91.2975	87.5221	39.6205	51.3434	74.006	33.9273	57.982	83.1109	54.8294	66.1826	73.5636	94.7226	63.3714	38.2023	50.1417	87.225	68.3323	92.6839	57.0357	47.4458	32.1087	71.7403	93.1868	51.6315	78.7267			64.1809	70.8408	28.188	54.0946	43.661	43.2024	80.192	51.1799	46.674	51.759	41.0825	70.844	94.1253	58.7462
0.4	85.0817	70.9362	67.8659	88.4606	92.2576	80.2227	67.8222	87.445	91.7275	88.4464	43.468	53.305	78.6069	40.412	63.3274	87.4904	60.0967	69.7961	75.2741	92.0799	63.8198	41.099	62.4457	86.6959	77.311	95.7578	56.8906	54.5588	37.4762	72.5484	100	58.4077	83.6167			67.0738	71.559	30.5128	60.1862	46.2769	45.8031	81.968	58.5424	53.0153	52.6755	48.044	77.7292	99.1999	57.5447
0.5333	86.8841	76.1788	65.8996	90.8613	91.2725	78.4412	83.9325	86.4024	91.9038	85.6474	47.9248	53.3398	76.5524	46.4097	70.197	89.8047	63.4288	71.1687	76.5682	88.0442	60.9722	43.4011	74.9065	86.1406	78.1784	95.0234	60.6152	59.6069	38.7532	72.03	90.4169	56.801	87.8922			66.0862	72.6582	34.2211	65.7779	46.5678	44.3381	85.6173	62.0713	57.3717	58.0412	52.1536	75.2378	89.6116	59.2141
0.6667	88.2957	77.0661	65.6734	95.5169	92.2783	79.796	92.0172	87.0549	93.5904	90.4242	48.8274	53.2901	77.8465	48.8132	72.2163	88.4058	58.5663	66.3133	77.0272	88.0581	59.5731	44.2439	76.0611	83.7918	77.6996	92.7253	62.9532	59.9516	41.4403	70.6868	90.0191	58.7393	84.0441			65.0387	73.0477	37.5412	68.561	46.3289	44.3048	77.2137	65.8723	59.8982	60.1843	56.3269	78.167	84.057	60.5948
0.8	86.8911	75.9185	68.0517	99.2792	93.153	84.5094	94.2994	87.6532	93.506	84.9527	52.6323	56.1953	79.6652	52.9036	74.2894	89.3439	55.1327	65.0809	78.1543	88.6038	60.2628	44.0519	70.4456	85.0976	76.0016	94.0944	64.8502	62.4276	41.0225	69.2237	87.421	62.2054	80.488			65.4228	71.6467	38.9372	72.9217	46.4629	45.6818	76.6705	68.7531	61.3334	59.8892	61.0397	79.7447	83.2732	65.5322
0.9333	84.7396	74.1679	68.4411	95.9827	93.3205	81.0966	92.618	86.5764	92.377	84.4512	51.3406	55.6877	78.05	54.5694	77.2585	88.011	59.5032	63.2755	78.8396	88.9771	61.3737	44.92	68.7164	84.3264	75.217	93.2883	65.6203	61.7471	44.9826	71.8685	86.929	65.4671	81.2756			66.346	68.9007	40.4376	74.7227	47.9113	42.7373	77.6801	65.9667	63.1162	62.1342	58.1983	81.6375	83.6803	64.5246
1.0667	85.5073	77.0647	67.9168	91.8422	92.8898	80.1244	88.5311	86.2841	93.2477	85.9899	52.6371	58.6632	79.6024	55.1556	71.0264	89.3983	54.4592	62.566	75.9736	88.0041	64.1986	44.5919	66.7401	83.1842	71.9481	92.9436	63.8636	61.0706	49.5181	71.2278	87.8591	58.4342	81.5979			69.1209	66.1278	40.7544	73.1057	46.5163	43.398	78.1264	68.8041	62.2441	64.4728	61.7263	82.9491	83.7535	67.1225
1.2	86.0209	79.0459	70.3434	92.0066	91.8898	81.6346	85.4162	88.5903	90.429	89.7831	56.2795	57.2845	78.7861	54.7934	74.1563	91.6363	55.9555	64.3326	78.6341	89.3368	64.6232	41.3513	67.8891	82.7505	75.5105	91.191	64.6224	60.7676	50.1572	73.1116	87.9684	55.8457	83.4952			69.0385	65.1854	41.4344	73.6109	46.0976	46.4389	74.3043	64.5507	60.4609	67.5003	61.9528	80.6776	82.2474	70.0278
1.3333	85.6516	76.9353	69.0131	93.2133	93.3479	84.4438	84.9423	85.7369	93.4007	92.8326	55.1716	59.5232	73.8336	54.6421	72.0659	87.8923	55.3857	64.9852	78.2091	88.9357	66.1739	41.3487	67.5996	83.986	74.9642	95.831	65.104	55.9632	48.3245	77.8038	88.0164	51.1295	84.0782			69.0822	64.5612	42.4212	76.8595	46.1412	51.831	74.8267	63.7893	60.923	71.3859	64.6881	80.1307	82.3064	68.1016
1.4667	87.6375	73.115	68.8559	95.3843	92.764	82.987	82.9003	87.6568	93.334	92.2874	55.0078	61.0432	73.0034	53.916	70.1047	89.7421	56.9444	64.7999	77.1293	88.1657	65.1616	42.559	66.9706	84.6936	76.3889	92.4118	62.9703	54.2027	47.2387	81.9379	89.3754	51.6505	85.6544			69.9047	61.4003	43.6287	76.5678	43.7485	51.6711	77.2694	63.2548	64.0299	72.3036	66.2426	81.298	87.528	72.7803
1.6	88.2593	71.1145	72.4704	90.8222	93.2435	83.4842	81.0714	88.8136	92.7622	86.9067	60.5345	68.8484	77.3239	52.3075	68.0351	95.7311	65.7738	63.5346	77.1308	89.2848	65.8284	40.7301	65.8547	86.5533	76.4309	92.7945	63.2984	55.2247	47.8174	89.5274	85.4769	56.3441	87.8317			70.4613	61.1305	44.099	77.1269	46.1419	49.2505	76.3481	59.5498	63.3186	73.6041	63.5108	81.7109	90.5696	66.7119
1.7333	88.0648	70.6074	77.1353	91.8093	95.0198	86.272	82.4564	89.4073	95.4863	82.287	65.467	72.1886	76.7952	48.5731	68.0774	91.4525	71.1342	63.9044	77.0041	89.5744	66.7767	40.0784	64.4919	94.1235	73.4088	92.8015	62.5258	54.6006	48.3758	97.9787	80.8293	58.9013	88.7973			71.4037	61.3817	47.2056	77.7375	45.6646	52.9009	78.2433	58.9463	61.059	76.4901	64.7956	81.8514	90.0795	71.9871
1.8667	91.0571	71.2482	86.1257	89.7333	94.2375	85.8771	82.1137	91.1304	95.6143	81.8428	74.4413	78.4996	79.6402	51.0038	69.3246	91.1543	75.434	72.4666	77.0813	86.4246	68.2781	40.8112	66.6311	91.8904	75.9321	94.242	63.064	55.1557	50.168	100	83.6441	55.8989	91.0517			75.173	70.961	46.3855	76.1717	44.9347	58.2865	81.1991	63.0553	62.799	66.7962	68.3187	80.263	92.1121	73.6991
2	90.8669	72.1739	91.867	91.7955	93.3784	85.4695	84.6088	92.9671	94.4994	81.5154	81.9202	81.1017	90.5809	52.0078	69.2733	95.4667	65.5443	69.004	76.1406	85.2797	67.7346	40.6486	70.3529	90.2322	82.1622	97.0645	66.2404	54.0019	48.9996	95.7013	80.739	56.9139	99.2721			77.6252	83.5203	49.5367	78.9267	46.4069	54.6884	86.5464	69.0922	65.481	68.7443	69.2478	82.351	92.6574	69.6154
2.1333	91.8692	77.7574	92.7038	94.5979	95.7411	82.6112	88.9914	95.6902	93.9412	84.9655	82.756	81.504	92.6046	50.8279	78.3977	100	65.5553	78.6684	77.054	87.8294	66.8402	42.9934	76.3056	91.7539	86.8526	96.31	65.7057	55.8666	46.3673	96.1557	79.092	60.6042	100			78.582	85.7869	51.4286	73.3448	44.1307	52.1818	100	72.8927	62.135	71.7817	67.6212	81.7414	96.4562	73.7557
2.2667	89.6427	90.1746	92.7594	93.3275	96.1856	80.9231	92.4668	92.9199	95.0701	88.3593	87.5447	82.5746	97.7071	46.4083	77.0598	95.8151	66.3255	89.13	78.1443	85.2467	70.9979	45.6722	85.2102	91.9669	91.8653	98.7703	70.6667	56.8745	46.5071	95.9095	76.6073	67.9476	96.8224			80.2639	85.3829	49.5	75.4948	50.9616	54.4135	93.1001	76.3632	60.7198	75.5064	65.9667	82.7512	100	74.6719
2.4	89.9239	90.1736	89.7572	94.5549	98.0136	78.2073	99.321	95.6591	95.6737	91.0143	88.5917	85.3079	93.187	47.1922	84.0449	97.7133	64.3641	92.3003	79.0936	87.2135	76.0957	49.3256	84.7816	98.0702	97.3585	100	70.5488	55.6557	47.8732	93.1471	83.9202	71.4798	91.9122			80.3611	85.1179	48.9143	80.5284	65.2731	55.1662	92.1047	84.9382	64.7079	84.0949	73.5235	88.682	95.1507	79.5251
2.5333	93.2756	89.636	86.1922	92.4135	100	79.1511	96.8675	99.0257	94.5732	89.5487	87.5452	85.4256	97.2649	53.6956	99.9275	96.1849	65.1509	96.9946	83.0296	87.5947	77.909	51.5242	82.0496	95.6137	100	99.434	66.3753	55.2998	53.1616	92.1879	81.6371	81.2897	91.3158			80.1608	83.0083	51.0891	85.7466	81.3951	53.212	89.8293	91.2443	66.0118	87.4204	74.8683	84.9716	92.6367	88.0781
2.6667	100	90.5529	87.776	93.4234	93.9505	83.0187	94.3893	98.0065	95.299	94.91	94.7442	88.3476	99.5707	54.8854	98.1742	96.0075	72.4079	100	94.5353	87.7767	81.9766	56.5984	84.5853	91.2668	91.6573	94.0218	70.1586	56.3945	56.014	83.8532	87.0413	86.4845	88.2471			81.4109	86.9614	55.7414	89.8468	94.1408	55.8865	91.6889	95.153	68.5815	91.8887	77.2995	88.6495	90.9006	89.4982
2.8	89.3301	91.1221	87.5885	94.2099	90.4049	80.2699	96.1642	93.9707	96.3612	91.9386	100	91.3693	87.7362	60.3088	98.7079	97.0363	89.2713	99.1641	100	91.4471	86.9619	56.8384	87.7452	90.1353	85.4157	98.1864	72.0556	58.9202	60.6545	86.2842	85.9812	94.1106	87.5428			76.3611	93.9605	58.8605	93.8852	100	61.6218	90.7995	98.3042	73.3651	87.5195	83.6695	91.4411	91.8768	93.2573
2.9333	92.9283	94.4673	90.7535	93.7665	99.0786	78.6118	98.822	94.9857	95.02	93.2403	96.7337	92.7577	91.9796	65.4865	100	95.4533	100	93.0126	97.3006	89.8832	86.5992	56.3138	89.3749	99.4895	84.0262	95.9113	65.3144	60.0862	63.8891	90.6238	84.8257	100	84.9883			77.7049	100	62.7917	99.9331	95.6877	68.6016	83.1484	99.1287	76.6334	90.4759	86.3101	90.2381	96.5683	92.4639
3.0667	93.698	100	92.563	92.5602	97.6393	82.0255	100	94.3893	96.7418	98.1865	94.4919	91.638	84.7182	74.0492	97.6042	94.4455	96.1542	89.333	93.6772	87.3775	85.7286	61.3902	85.4283	91.0778	82.3057	96.6284	64.963	60.8328	66.2523	81.0613	85.1155	92.8017	84.9549			79.2198	98.8846	67.0365	100	81.9965	76.2927	84.7199	100	85.4337	85.7038	90.1777	92.3243	95.9458	89.8084
3.2	93.8166	96.4165	89.641	95.4675	95.9951	82.1464	97.4617	92.2704	96.9933	93.9384	91.3364	100	83.493	74.2989	89.0924	91.7644	96.8639	90.0026	89.7908	90.0434	84.764	62.3511	83.9946	88.8476	80.8911	96.9424	64.9624	71.2863	68.494	85.5562	87.4794	82.3084	83.5693			77.3702	92.8251	72.0694	96.0053	79.6247	87.1697	88.2185	97.2911	89.6366	85.106	92.6401	87.1907	92.2278	81.067
3.3333	93.7225	93.1996	90.0331	93.1689	97.8636	84.1014	99.2497	92.6834	94.9208	92.886	89.8949	89.7204	77.3671	77.9276	85.4127	99.1358	95.3261	86.9746	82.011	89.4745	82.7438	62.5383	86.29	91.0562	83.1341	94.7047	63.5241	75.3337	65.9978	87.3613	84.2128	73.7249	83.7997			74.6402	96.0286	77.4089	96.7035	78.7702	91.7192	84.5661	98.5742	88.8485	82.4248	90.4179	84.9942	89.7691	76.314
3.4667	92.9848	94.5084	87.7578	90.3445	94.5202	83.6328	94.2763	97.9071	94.8196	91.7371	87.0485	82.7381	79.758	78.0374	86.5571	96.8524	89.5739	84.6559	80.0557	90.2739	81.5724	59.5478	88.2487	88.8866	90.1805	95.5735	60.9396	78.3923	63.7907	86.5909	86.9235	64.8233	81.7211			75.3802	91.4149	82.2157	95.2928	76.1313	92.9642	86.0851	99.1281	92.2853	81.4804	93.3093	84.2227	89.3281	77.2847
3.6	92.6687	93.6742	85.1105	88.8732	91.8673	84.9084	94.7287	96.756	95.6814	92.451	85.4977	78.9017	80.8318	80.6637	86.2428	90.6167	85.0633	85.6204	82.1283	86.2077	82.0279	59.1633	89.5935	90.3485	85.9231	96.0225	60.7984	77.9291	67.32	83.9911	81.2023	48.6436	86.0957			75.1141	92.5437	84.7261	93.2583	80.0546	91.7974	88.1567	94.4644	93.5538	78.7763	94.9689	83.3297	93.2189	77.1108
3.7333	94.0478	90.7662	80.8046	88.3759	95.3946	88.0864	95.3277	93.5062	97.1291	90.7259	84.452	76.7677	78.8605	79.6833	84.1017	91.1453	89.1131	80.8917	82.6924	87.9827	82.3566	57.9162	89.9604	89.8028	84.4828	96.8095	59.9143	75.8054	75.6341	83.413	82.4601	36.5408	81.0244			77.7803	92.9298	81.3255	98.0731	62.2052	95.7026	90.8479	93.6897	94.3968	77.6262	97.9923	88.2265	93.5579	84.4362
3.8667	93.5179	91.854	81.1497	88.8253	97.7581	91.3535	93.682	95.2893	97.2856	89.2674	82.5424	75.9876	83.7021	79.4851	84.5512	89.7351	86.7154	75.9539	84.0114	83.3652	80.1879	56.782	88.6551	88.5899	85.0906	95.4744	59.8499	76.7415	92.2611	84.3822	81.6039	35.1575	80.778			80.2676	90.5185	78.1109	94.6402	57.3628	99.3066	89.6584	91.0174	96.3534	86.3804	94.8648	87.1026	88.5276	86.0845
4	95.9089	89.4419	75.1314	88.949	97.6941	97.4459	88.0527	95.9053	95.4484	89.5035	81.1218	74.4987	86.4691	80.0829	84.5024	92.5626	89.3563	75.6758	87.1463	82.8814	78.7283	58.7197	88.662	91.0509	85.9177	95.5178	59.0891	78.1319	100	83.4767	81.5083	34.6369	77.7774			80.6573	86.8034	76.628	92.2787	52.3956	96.6732	87.7905	85.6316	95.0242	86.9866	95.0966	86.683	88.1083	84.7324
4.1333	95.1272	86.8648	79.4776	90.9331	98.3865	93.4543	88.6586	96.5231	94.293	90.6054	86.302	75.699	86.6368	79.8833	84.2714	87.9045	87.7885	75.4823	87.3439	81.68	81.7268	61.3232	88.3153	90.4636	80.7951	94.399	58.0831	78.1251	94.4086	84.5257	80.8942	33.7785	78.6057			83.1976	89.2622	72.6537	86.6741	49.7469	100	90.2503	79.1939	95.7849	89.5797	95.17	85.4985	89.347	84.4636
4.2667	94.2064	87.8104	81.5116	94.8157	97.7267	91.0063	87.0136	95.472	95.4518	89.5668	82.0077	77.6732	84.7317	75.6665	80.2086	88.065	78.2071	70.1285	86.0131	81.7506	81.7842	64.7237	86.4518	89.4988	75.9816	93.0178	60.0747	77.3783	97.3091	82.7594	79.9994	33.2502	77.0603			83.5996	87.7391	75.1436	82.2245	47.5951	97.1628	89.292	72.3507	99.2001	89.4541	89.2336	86.6567	91.8431	85.3956
4.4	96.6583	88.5399	78.975	93.3802	97.0422	94.6901	89.4443	95.5929	96.6175	90.6239	84.1064	75.0208	90.5164	75.33	80.7471	88.6784	73.3998	70.7004	86.968	82.6176	80.028	71.7936	90.145	89.7305	74.9928	93.2207	60.5063	79.0904	98.4672	83.2775	80.5956	33.2778	83.3978			82.8365	88.4004	76.7814	79.7851	48.2854	93.8639	87.3046	66.3208	100	94.3978	91.4272	84.9978	93.8035	84.7146
4.5333	94.4633	84.8986	77.6513	94.2778	98.5693	95.8405	85.0486	95.8141	94.4689	88.5737	84.4329	76.2543	89.6714	76.4016	80.136	87.4285	67.0034	75.0461	86.2151	90.5072	78.5657	82.0595	93.7171	92.6379	74.9397	95.2506	60.9572	83.0759	96.0771	83.2841	81.3464	31.9454	78.8704			80.6916	83.5574	74.5114	74.4335	50.7121	94.8524	89.1856	67.9647	96.1848	95.0383	89.7669	82.5558	87.6852	83.8835
4.6667	92.9773	85.8449	73.5062	92.5871	96.6507	100	85.3517	96.1066	96.9142	89.357	79.8727	77.7322	91.5629	78.9127	82.2743	87.935	64.5688	74.6545	83.9491	86.8987	77.1745	87.5228	92.5831	91.0061	76.1847	95.1944	60.0938	82.0521	93.8327	82.3221	77.5814	32.0936	70.3829			79.4332	83.5052	76.0513	72.7899	51.9662	94.0778	89.457	68.8089	91.653	96.4215	86.3466	84.3028	88.1025	86.8175
4.8	90.4114	86.9432	72.9232	94.5925	95.1131	90.2744	84.987	97.1077	99.8538	89.9768	73.7087	73.3261	93.8865	82.0688	86.4412	88.4909	64.6508	76.341	82.4943	88.0685	78.7205	92.683	93.9749	92.8328	78.916	91.7148	60.5229	81.3091	96.7919	82.7979	80.4398	31.5671	74.4595			78.2176	88.0149	78.8643	71.5497	55.1787	97.1278	90.9304	66.3707	93.8929	94.7017	87.1573	86.3299	89.5677	86.141
4.9333	90.4766	84.485	73.4224	96.7722	94.7205	90.4495	87.845	100	95.7854	89.6513	70.2985	77.0247	96.2326	80.668	81.9243	87.6501	62.8829	89.3416	81.3317	85.8699	77.1342	99.7628	96.1943	96.9295	85.3164	92.1409	64.555	83.9765	94.0374	79.4366	85.8966	29.7287	75.1877			78.9044	89.6005	77.897	67.607	59.075	93.4583	91.0907	67.7627	93.8792	91.3206	82.5075	89.815	88.6529	83.5392
5.0667	91.6894	90.4728	77.2224	97.6602	98.4128	88.782	89.0358	95.0294	95.3983	82.0934	69.1576	82.0102	100	87.4551	80.8175	91.1042	63.8739	83.9344	81.5326	88.8476	75.1139	97.5529	92.8085	95.5905	82.4737	93.8424	70.205	83.1218	92.4585	75.6159	84.3366	31.2042	78.0819			78.3068	88.5824	74.4274	69.3523	58.4453	91.7564	86.8561	72.5584	88.7309	96.7966	79.9834	89.719	82.661	85.7673
5.2	92.9471	92.9092	81.2771	97.7046	95.4075	89.8166	82.7809	94.4163	96.566	90.855	70.737	77.3349	98.4357	82.7241	82.2948	92.9408	62.5123	81.2917	82.6086	91.206	77.857	98.9861	91.108	91.9166	87.6355	91.295	64.9852	86.341	88.8242	81.0029	81.8958	31.056	77.1834			77.0868	88.0379	69.8447	66.3481	55.6994	87.8995	86.9217	72.3033	86.2272	98.3163	77.7301	87.8272	79.94	85.0768
5.3333	93.0655	90.038	80.1178	98.9736	92.679	86.4385	82.2373	93.5013	95.6435	86.6502	71.0307	75.7816	95.7412	79.9343	80.4594	93.4192	59.7481	73.5655	83.2114	85.7028	84.0898	100	95.3233	89.3603	81.1394	93.3874	68.7363	87.832	88.7799	81.2058	81.5182	29.7603	77.1905			79.956	86.1872	66.1008	62.5606	55.7392	93.4071	85.1969	69.6099	84.651	100	76.9283	84.8245	84.095	83.8474
5.4667	89.9785	88.8679	77.1226	100	90.3078	91.4789	83.1446	93.9151	97.1273	90.0346	72.9062	73.3677	94.1853	81.6427	77.763	90.5517	61.3377	69.1363	85.587	84.8153	85.6053	89.9	93.7995	89.4482	84.6155	91.2385	71.2828	91.5218	87.297	87.4653	80.7271	29.8014	78.3163			77.6635	91.3803	62.5649	63.7912	54.3921	91.9703	83.5419	70.6371	82.5699	98.8888	76.5658	90.5502	89.486	88.5449
5.6	90.4424	90.6141	74.7944	96.7138	93.3356	87.0929	76.3558	97.5373	96.4522	90.6016	74.2583	71.2981	91.5806	85.5256	76.5785	90.4674	64.1045	64.4517	84.8732	88.5027	81.9961	87.9775	90.8275	91.0813	80.549	94.106	70.5999	100	84.8993	80.6119	79.3658	30.3577	76.3787			76.4732	86.3273	59.6931	63.5511	56.3379	79.7735	83.0917	69.6012	82.2434	96.6934	79.6409	82.3177	84.4015	95.5732
5.7333	90.7721	90.2728	78.125	95.0365	92.5381	83.4953	77.8358	95.5995	93.4654	89.4509	77.6177	71.7067	87.3267	87.5179	79.7539	88.1142	63.3586	62.7279	84.8205	87.6469	85.8016	79.4511	91.7929	93.3338	90.1549	93.033	70.0927	97.836	82.2769	81.0078	79.6551	32.2736	73.8099			77.7973	86.1215	56.3962	66.0722	59.0667	73.8622	84.1846	70.3356	82.9179	97.1711	82.7876	85.6634	84.4163	94.6112
5.8667	93.8668	91.3434	78.812	95.3603	92.5031	83.5611	81.9537	90.9691	94.6738	91.2715	73.7372	69.9246	83.7349	84.7455	82.2767	85.9801	66.0167	65.8489	87.2121	88.3454	84.5902	75.3211	95.441	96.1348	86.3709	93.0858	71.6673	92.6398	78.6103	77.8232	74.9889	32.8526	71.1528			77.157	84.8286	54.96	70.6349	58.3051	74.1189	81.9738	73.1048	84.1256	93.8538	81.3127	90.6455	86.7801	93.135
6	90.8308	91.8251	78.2434	95.1973	92.9649	82.3911	82.8107	90.0175	95.6418	90.8977	74.0564	71.5907	92.215	84.0597	83.0385	88.2929	62.7346	65.6795	81.9838	88.0528	82.0452	72.9376	98.9932	97.3013	85.0739	93.7781	78.5688	86.6682	81.2295	74.8879	72.3379	32.9559	66.9092			76.054	83.8067	53.5961	67.7255	59.3854	70.5978	80.7091	68.0263	82.1702	96.5919	77.748	87.4814	86.3188	89.3859
6.1333	90.3616	90.4067	75.2245	95.597	97.8259	83.8009	80.4825	87.3609	94.7481	94.7262	81.5405	75.6986	96.6994	83.0925	80.6273	87.4793	65.6333	70.1504	83.0569	89.4643	83.8554	67.2427	97.3187	100	84.9982	93.1665	83.971	84.2178	76.6729	71.3171	73.4924	31.6804	67.6859			76.9904	82.917	52.2588	68.7029	60.2053	71.0916	81.6629	67.8323	79.0153	92.5464	79.9784	87.0565	89.2227	87.0643
6.2667	88.8573	90.8495	74.5269	96.2694	97.9555	86.6714	80.7451	86.2441	97.6005	94.4144	76.4842	71.581	87.8927	82.7507	78.4407	84.9302	64.9602	70.0835	80.4646	92.5789	80.7305	66.327	99.8465	96.0797	85.4799	90.2039	88.4518	80.1948	77.4842	75.4389	73.4294	32.4413	65.4589			77.9423	83.3561	55.1633	72.1036	61.7901	71.8407	82.5001	65.2658	77.9334	89.0333	86.3045	90.3478	93.9784	82.001
6.4	93.4659	90.696	79.8482	90.169	92.656	81.9921	78.6755	88.6701	93.4107	99.0744	77.1987	69.916	87.7317	78.9981	81.7786	85.3377	62.0688	70.3529	83.7555	89.3198	79.8288	63.8736	100	91.7434	80.9497	92.4095	92.0724	74.7486	76.4999	68.2432	75.0244	31.9176	69.8381			79.8717	81.8779	58.7427	75.6526	60.8484	74.1352	80.0388	64.6713	78.7663	85.6364	85.4939	92.9777	95.9573	81.3785
6.5333	98.6247	92.411	78.4141	92.6869	91.2622	86.0433	79.6493	90.3688	95.4834	98.2612	73.8995	68.4612	90.6335	78.2184	79.3025	88.8155	62.9645	62.4645	81.7392	91.4094	77.0071	62.1714	94.6228	92.711	80.5929	91.2326	93.1436	76.7537	73.6431	69.713	74.5531	29.1288	68.0826			83.6643	85.8578	56.4762	79.5916	59.1139	74.1527	77.2946	63.0179	79.6359	90.6923	80.9374	92.09	92.3239	80.3424
6.6667	91.7491	95.0505	84.4177	94.3873	91.6144	83.371	78.98	88.4122	95.1068	96.716	70.3364	70.7301	95.3166	75.2425	76.393	88.6231	62.0848	63.1739	82.052	91.4252	75.8463	60.0658	88.4857	94.7292	81.8085	88.4653	94.5255	73.2384	77.7662	67.4864	73.2559	30.3501	70.4115			89.199	83.9831	57.5689	72.8518	58.7763	70.2222	84.1614	62.3303	76.0451	86.6137	81.6878	94.0167	92.2	82.1462
6.8	89.0256	91.5256	81.6096	98.6751	90.498	80.7079	78.7195	86.1578	95.411	91.9983	72.2406	71.4202	93.8572	72.3491	75.436	88.1656	58.4353	67.876	84.55	94.0531	77.8691	58.4892	83.9473	93.7414	82.5508	91.5213	100	66.966	68.4788	65.6937	75.3507	30.0652	67.0562			92.7266	85.752	62.1442	71.3966	59.8874	69.9055	77.692	63.4799	78.8387	85.137	83.4434	97.5228	93.4806	86.5356
6.9333	90.5048	88.4919	86.4537	96.1727	94.6856	79.2299	78.0411	86.9353	94.2499	94.8561	70.7904	72.0683	88.4082	70.8879	78.2645	89.7688	57.4194	63.0546	84.5393	95.1918	83.3761	57.9344	81.2267	89.5035	84.5274	86.5377	86.3431	64.4116	66.6703	70.9378	74.2093	31.7296	66.1448			97.22	87.9349	62.8688	75.5161	67.8932	69.0957	76.3266	63.3717	79.8172	90.0783	79.932	97.9013	90.5618	80.2023
7.0667	89.7905	87.1875	89.5238	96.5421	90.5804	78.7011	82.0149	86.2786	95.7911	92.5144	65.8889	69.434	86.3807	74.1263	77.5446	83.4468	55.8682	66.3184	79.1553	90.3937	92.3594	58.0903	80.8695	89.2084	79.8595	88.5176	86.1112	63.5015	73.5664	70.2558	73.8111	31.4891	68.0705			97.8012	87.2224	63.8905	69.6706	69.7451	76.3705	77.641	61.1285	74.5971	89.103	85.6049	96.5839	88.2369	84.7895
7.2	91.6149	94.3303	88.8266	97.1049	90.1649	78.5046	82.9059	83.5976	100	91.4236	68.1016	71.6204	86.6569	73.9726	78.9802	91.1461	56.1437	66.6618	77.2794	96.8607	88.3701	58.6905	79.6919	86.8023	80.4693	89.7872	76.0395	65.6773	71.6329	64.7568	75.4692	30.6266	67.3447			100	83.1365	67.5498	73.0363	66.8005	74.1635	80.586	59.2262	74.7067	87.4237	89.5464	98.2224	93.1847	85.0455
7.3333	93.8516	94.4154	88.7554	97.0291	90.2691	79.8898	75.7127	82.6322	95.561	91.0605	67.9874	68.2385	88.3999	75.0756	78.2319	89.4517	55.1514	64.0647	77.9469	94.1404	88.9571	53.8223	76.9819	83.2674	79.3507	88.0022	76.4129	63.0975	68.9393	64.4371	77.7251	29.2561	69.637			97.0237	80.0016	72.7245	70.3644	65.924	72.3848	80.2822	58.3438	81.1126	88.9913	89.9334	98.1403	92.2583	92.9104
7.4667	90.9924	89.8353	95.295	95.7562	87.3743	76.6277	82.1903	85.3307	95.5602	98.5161	65.668	63.6118	89.9343	77.9443	81.0051	93.5308	58.5553	63.7901	76.4987	92.4751	85.1802	49.6589	79.6342	81.7028	79.3987	91.0465	71.1183	60.3699	73.8092	67.6285	75.951	28.9266	73.4046			90.891	81.7986	69.724	68.6356	64.8768	72.6226	81.2365	58.8322	78.9159	88.7092	89.8523	100	93.417	100
7.6	88.8762	88.0867	91.3473	95.8142	87.0132	77.5454	73.3492	87.3198	95.8134	100	63.5461	61.4354	85.7851	75.3624	82.6884	85.8308	58.6296	65.0518	76.5712	91.7772	86.4701	48.3103	83.6794	85.1399	77.1056	92.241	72.2047	64.2723	79.0978	70.6644	80.4059	30.303	70.0676			91.593	84.7876	67.1962	67.2182	64.8517	71.2964	79.6923	63.1829	83.7988	90.6106	100	97.4882	81.3727	97.8695
7.7333	90.6627	91.624	94.7326	93.8022	87.9824	76.0332	81.018	85.3511	96.9641	97.4612	63.1287	59.4734	82.3294	78.4663	79.9455	93.6226	58.4886	68.4397	75.8805	87.5608	91.6736	47.8002	83.961	82.9152	81.2257	91.3819	69.8959	61.2655	78.3164	69.9203	77.842	33.718	71.1064			89.3809	82.016	62.5661	67.6617	64.727	74.265	77.9597	62.7998	81.3693	87.9909	95.0834	94.7067	84.6527	94.7195
7.8667	95.1378	94.7192	88.5834	94.2733	88.6514	78.8397	84.4276	87.5573	96.462	95.0482	63.0463	61.3908	85.0864	75.729	79.2415	87.3211	55.7028	66.8447	78.4105	92.4253	100	47.011	83.9316	81.8289	78.9882	92.5638	74.6493	58.4095	72.9135	71.6639	80.2426	32.4974	69.1961			83.9369	82.3415	60.7836	65.8034	66.7583	75.6992	76.9568	64.6637	78.3466	84.6376	91.1919	96.9863	86.5916	92.8791
8	90.9806	92.2592	92.2517	98.4118	92.7275	76.7094	82.5618	85.8166	95.1881	91.1758	60.1232	61.0608	88.8788	76.1993	80.2726	93.0727	57.8683	66.5449	77.5026	84.8146	97.1974	46.7294	86.5174	80.5854	76.7859	89.7648	74.8952	58.7724	73.0282	74.1734	84.084	30.4307	69.3411			82.4337	88.8175	61.7372	69.9754	68.9566	78.5045	75.9386	66.7961	75.8545	83.6373	90.9125	90.8704	90.2176	92.9592
8.1333	91.7598	86.5377	89.6098	97.0426	88.6477	77.6555	84.2463	86.1711	94.9839	90.3808	59.3079	58.3316	89.4946	78.2802	80.7598	88.0943	56.6409	66.934	80.7117	87.1654	94.501	47.2107	84.8684	82.0522	76.4479	90.2281	74.0912	56.7555	74.0022	75.142	82.0382	26.6297	68.8833			83.3977	84.6774	65.259	72.3877	70.3331	81.0416	79.747	66.2501	74.0229	79.9371	95.1209	90.4619	89.2309	93.9944
8.2667	91.1725	86.7859	78.5491	95.1851	87.4051	76.8884	81.3715	82.404	94.6541	90.4761	60.1253	61.054	86.1899	79.5112	82.0312	86.7376	57.1873	65.3422	81.2315	90.6703	98.1295	47.8568	81.4241	83.3787	74.4564	89.9109	72.3814	57.498	75.458	75.8687	79.3464	25.3222	69.4459			78.9664	81.9738	67.9913	68.0185	75.5057	84.3304	76.4387	67.6125	77.7684	78.8244	91.6258	81.1011	88.2683	91.1847
8.4	91.1911	86.8612	84.4142	91.7722	88.6312	81.2866	80.6252	84.8393	94.9949	92.9543	59.9791	60.2634	92.5584	81.3533	82.8565	85.2329	55.9014	67.2113	82.8835	96.5384	91.2438	49.0406	80.3234	80.8441	80.4741	91.6867	72.208	58.2701	80.2568	75.791	78.9646	24.9562	69.7423			76.4925	82.2982	68.7776	64.7588	73.9501	83.0425	74.3426	62.483	76.5416	79.7207	82.7566	78.9433	87.236	88.2415
8.5333	87.761	86.0808	85.0254	93.0677	87.7956	80.3825	81.9965	85.0027	95.6101	93.2053	55.5678	58.5793	93.2619	86.4425	83.1682	87.8793	52.7736	68.431	83.7571	93.2255	84.706	48.3697	79.0856	82.3661	78.689	93.3672	71.7441	57.0043	81.9622	75.8124	82.0959	26.1119	65.6125			76.8608	80.3589	76	63.954	71.524	86.0903	79.1934	62.4526	72.3173	82.2577	80.5557	77.1247	85.3017	85.0453
8.6667	89.3548	85.0461	86.8075	93.1776	88.2088	80.3174	79.95	84.8786	99.8096	86.7242	54.8852	58.3106	92.671	94.5655	84.6359	90.0236	53.6406	69.1363	83.1159	100	83.6308	50.1614	78.2582	83.1223	75.0095	91.3828	71.1012	56.6107	84.1342	77.7868	82.7216	28.0636	63.4395			75.8688	74.3115	85.4149	63.4695	72.4974	86.2954	81.6429	62.1585	71.4636	85.1974	81.8763	78.6247	82.1514	87.7653
8.8	89.6362	83.7542	91.0917	93.0183	88.5784	80.0779	76.1292	87.3056	97.1098	84.2852	54.0257	58.6232	86.0925	100	83.2199	89.2614	55.2887	65.1984	83.2254	97.8867	81.9353	49.8911	76.9679	84.3764	84.7971	92.5526	72.0225	55.1982	81.7652	74.267	86.4496	27.7978	64.7619			79.0373	74.5184	95.1413	60.5201	71.7924	85.024	76.5502	61.8987	67.445	85.9172	80.8355	84.1918	87.2014	82.852
8.9333	88.1652	85.2504	97.8479	90.7655	88.4534	78.001	76.1617	85.0986	93.3326	89.7354	54.5113	65.4083	90.7686	97.4635	81.2925	85.4336	54.6847	65.9986	85.0695	87.8371	80.9638	46.9992	77.0062	84.5012	83.8701	91.7112	70.2881	54.7695	82.4676	71.8465	81.2978	27.7461	65.4475			81.0653	75.5325	100	62.8756	66.3355	84.12	77.0989	61.8466	70.7486	85.5947	83.5503	78.3684	80.6658	85.796
9.0667	92.6275	84.6921	91.7969	91.4422	89.3591	79.1915	78.5616	86.4704	96.1035	84.853	55.0564	62.2628	95.7468	89.7534	80.289	87.0718	57.0516	67.0395	85.1516	91.6436	78.5419	46.2786	78.6847	83.1648	82.6321	90.7051	70.3461	55.8246	83.6302	72.1303	79.5537	28.6917	66.6366			77.9349	75.6067	93.8785	57.3739	62.7114	80.4316	76.5033	61.2536	70.6238	82.2206	83.9793	79.8816	85.61	91.3744
9.2	87.3619	82.63	100	94.7384	86.3913	80.114	78.0669	88.1701	97.1667	87.7934	55.7538	61.243	96.6758	83.4858	80.6815	93.1096	57.603	69.4231	81.5446	87.0962	77.1097	48.7063	78.5384	82.6617	80.822	91.966	71.4078	55.3049	80.8626	73.1021	83.4224	26.6425	68.2476			79.9512	75.4015	78.526	57.8437	61.7971	77.5407	80.751	58.1897	71.9307	77.3862	89.7277	77.9704	86.0374	89.7233
9.3333	90.3873	84.486	95.2455	92.7	88.4131	80.4048	80.5284	87.0327	97.9521	88.3877	55.3348	60.9161	95.5502	83.7566	82.7759	88.6902	57.1744	67.552	85.9107	91.3458	77.0857	46.3509	80.6468	82.4807	77.5935	94.8894	72.0493	54.6559	79.7341	75.3813	84.1683	26.0399	67.9283			81.0371	72.355	67.9786	56.8606	60.0932	79.2692	78.158	57.6284	72.2083	74.6573	91.8034	75.5764	84.3231	87.5406
9.4667	94.2835	83.5184	90.2821	92.477	90.6358	78.453	82.9878	86.9234	97.9714	86.4173	56.4946	61.9323	96.5856	80.7938	81.7566	88.9258	55.9209	71.2098	82.5795	90.0731	78.2983	48.6571	79.7799	86.4499	86.9408	92.0995	71.8539	54.212	77.7717	75.432	83.0003	25.1646	64.1552			80.6586	70.7863	63.3991	59.1632	57.3772	81.2169	81.0848	54.7459	76.4185	73.2424	94.9273	69.3926	81.9355	88.7598
9.6	89.0678	81.7122	88.759	97.2589	94.0167	80.0179	81.2489	88.1356	97.6195	86.7091	55.8042	61.9495	94.204	76.755	81.4467	84.4008	55.4181	66.269	83.8717	90.6154	76.2205	47.0982	84.5762	84.3933	80.7696	92.754	70.6941	52.8561	83.0253	71.9104	80.1751	24.7712	65.7678			82.2137	72.8534	63.1227	54.9883	56.9365	84.0187	77.9865	52.2931	79.0215	72.314	97.0987	70.109	85.8615	89.6409
9.7333	86.923	80.9014	89.1742	92.6416	88.3145	79.6761	78.1899	84.4945	97.0477	85.5504	57.7068	59.4167	95.8077	76.9598	83.1421	85.3035	56.2346	67.199	82.5536	93.6189	76.1815	47.1815	85.0207	82.9757	83.2613	92.1995	69.4122	52.1506	82.748	71.0318	82.6901	24.2304	67.111			78.5677	76.1809	62.6736	52.3831	59.4995	88.2837	80.2432	49.575	84.5186	73.0184	96.298	70.701	85.0464	89.9878
9.8667	87.8242	81.2459	84.3297	93.4123	90.5704	82.6008	76.9602	86.4034	98.7881	89.1397	62.782	65.6869	96.3063	75.4859	81.3086	91.6385	56.7332	64.1456	86.0831	94.9315	75.7975	46.966	86.5262	86.6966	89.4413	92.4567	68.0536	50.3729	82.5436	71.3526	81.4617	25.6835	69.035			76.1262	72.2293	64.819	52.8775	60.0438	90.5304	79.8229	49.6954	85.5374	72.8303	92.1695	65.9667	80.0871	89.8107
10		81.8924	86.3482	95.8885	89.7806	81.4129	79.2624	83.694	97.6772	88.1092	63.5671	63.3282	96.4137	73.5293	81.3201	88.8408	56.7775	62.0931	86.2419	91.2003	75.9992	49.0112	85.571	89.5881	83.322	90.4221	66.361	49.0468	83.1197	74.1474	79.9444	27.2166	68.6079			79.2844	73.1931	66.7241	47.5217	56.5698	94.6554	80.659	50.9082	84.3451	73.723	89.5528	69.3407	82.0174	93.9892
[truncated: 17 more columns]

## Sheet: Figure S6-2C
Distance from cilia base	wildtype																																								tub-1
0	58.5025	63.139	41.6396	32.9679	47.0632	35.6777	35.6157	26.7707	44.9479	50.2438	64.8244	45.9711	56.5716	48.1618	57.5178	47.014	47.8911	72.1657	41.8139	41.4014	32.9008	33.4871	44.2355	77.5183	75.364	54.7503	80.5797	39.7673	43.8296	83.299											52.4724	60.8473	68.4337	46.6432	44.2757	40.7462	37.6865	87.201	31.6487
0.1333	58.1385	62.9555	44.0971	34.11	47.1023	36.5796	38.5059	27.4271	46.0692	53.9884	70.8808	46.9444	60.5681	49.9147	59.153	50.012	48.0913	77.6354	41.9582	45.6682	34.2135	33.8683	45.4004	77.6339	76.8011	57.5599	81.6367	42.128	45.9461	83.5452											53.1547	63.3046	69.947	52.9758	44.9759	43.0101	39.2329	86.7811	34.7872
0.2667	59.96	63.2067	45.5314	35.5168	49.2883	37.3588	40.8114	28.1591	48.2274	51.906	75.1071	46.4565	60.5089	50.571	59.8401	49.4549	49.6117	77.7667	41.8246	47.4039	36.7408	34.6432	45.9647	80.4362	77.5168	59.5642	80.6826	45.0211	48.4388	84.7686											53.6843	65.3755	68.208	55.9655	45.4025	45.7114	42.2167	85.6108	35.8344
0.4	59.5738	64.5198	50.8329	36.1568	50.5273	38.1259	41.6165	30.735	49.7189	52.7792	76.7259	50.1653	60.161	49.6117	60.6551	49.8691	50.6856	76.4007	42.3887	50.0275	39.7655	34.6118	48.0633	77.9609	77.7101	64.4122	81.7266	46.6977	46.5358	85.3053											51.4506	65.5706	70.8921	58.214	46.0699	47.0035	46.1633	85.5479	35.9337
0.5333	61.2428	61.8023	57.5842	33.7361	50.2694	38.8523	45.5189	31.5072	53.0555	53.3877	77.573	52.2854	63.0185	49.0286	59.7628	51.0784	53.3957	78.0694	41.5531	52.8225	39.9432	36.7827	49.2325	77.7938	78.5217	64.1052	82.6735	47.48	47.3477	83.2469											50.3861	68.3617	70.0446	60.8	45.5468	48.5706	50.7373	83.3161	36.7136
0.6667	64.211	65.622	56.9814	32.2061	50.8492	39.2978	46.6523	32.3971	51.4843	57.5074	77.4218	54.1229	62.4265	54.3804	59.8088	52.551	58.9535	77.716	43.533	52.3835	40.1763	38.1984	50.4784	80.015	78.5591	64.0742	83.4192	47.5138	44.6854	83.3364											51.3849	68.1104	70.5368	65.7549	44.0063	49.423	50.8116	84.2672	35.7938
0.8	73.5255	64.6294	55.1382	31.2445	54.5758	39.3241	47.4276	34.5281	51.0422	59.1796	77.3112	52.5503	64.3885	61.0379	62.1612	54.7468	70.963	80.1584	47.0763	51.3956	40.3684	39.7312	50.8141	77.8043	77.6739	66.6902	79.8918	49.4231	44.2932	83.4034											52.4309	66.6241	73.2372	61.2192	44.6067	49.6162	51.2096	86.3247	38.6037
0.9333	81.8074	66.4657	56.3493	32.3951	61.6434	39.6878	47.8288	37.4616	54.1355	63.9238	76.9695	51.1873	64.721	68.719	61.7294	56.6954	84.561	82.7972	49.0502	52.7466	41.3582	40.4352	48.8212	79.8334	79.3603	69.5397	74.9375	49.8741	45.3027	85.2821											51.8419	68.4391	71.6953	62.5617	45.9093	49.8208	52.0422	86.1024	38.2466
1.0667	92.9203	65.1753	57.9549	34.623	74.6187	44.6969	50.6766	43.1868	56.6689	63.0207	79.0458	51.1713	66.0873	75.1454	61.6473	53.492	90.2073	80.9011	52.9832	55.0423	46.7133	40.1183	51.0677	82.0897	80.7834	70.358	79.0175	47.9077	43.5723	83.3338											50.162	67.8442	71.2794	61.7511	47.7496	47.8784	52.9827	85.5029	38.7427
1.2	92.182	65.7345	59.5042	38.4076	91.9421	50.3495	58.5956	48.7526	56.7955	62.8577	80.0894	52.7803	63.1612	73.5628	62.9896	53.892	91.7616	84.9483	57.7486	57.5821	51.4783	39.3854	52.7029	83.6488	79.2433	71.6118	86.4416	48.0572	42.0787	85.4051											49.7919	75.1963	75.7654	63.4942	48.4151	48.725	51.541	84.2484	38.0553
1.3333	88.6812	64.1564	64.1912	45.188	98.0711	52.5368	71.1316	48.2965	53.8773	62.4521	81.2728	53.3988	63.4634	74.5741	63.5015	55.7369	97.7504	83.6393	56.6403	59.4401	61.9355	39.7825	58.3988	85.2613	81.6238	70.3381	84.8217	49.541	41.3043	84.9689											49.8361	69.0401	76.5615	59.3177	51.2439	48.4926	51.565	82.8803	39.4583
1.4667	94.2433	64.7753	69.0714	54.6065	96.3793	56.7241	89.9325	52.2399	58.6974	73.9586	86.8984	53.7624	71.2126	81.6751	64.4174	58.0712	100	85.0421	63.6669	64.1018	76.5721	41.7091	61.3304	88.4034	82.7139	70.5131	82.2143	51.0102	43.1596	85.3852											50.2443	67.0927	76.1533	60.4889	52.4457	48.4686	50.3046	87.3789	38.1573
1.6	94.5736	67.9101	75.6348	62.9816	90.6503	60.774	100	58.317	63.7061	80.9842	93.1747	52.8776	79.8664	80.7217	63.4648	62.3799	99.3357	94.4858	76.2275	86.1823	88.3273	47.0777	67.0521	89.6964	78.6255	72.5648	81.7649	54.8706	45.6346	83.9602											49.9053	73.1707	76.3168	61.2462	53.9715	49.4763	48.3651	89.6685	37.8164
1.7333	95.224	74.1544	81.0532	66.1184	92.7616	67.1581	99.6264	64.4951	67.1121	79.6878	94.6345	57.1567	84.4118	81.8004	65.5443	70.5508	96.533	89.128	79.3169	92.738	95.2343	50.316	69.8613	85.3318	80.6584	72.0867	83.9382	53.7012	47.821	85.5775											49.4317	74.3801	77.6422	66.0598	56.5957	49.963	51.2685	90.8715	38.3174
1.8667	97.7331	77.8071	88.2019	67.2781	97.1705	75.4619	97.9746	71.0246	73.681	75.0446	93.6567	61.2853	83.8223	76.722	67.1425	84.8596	94.5046	94.2242	82.9712	89.0923	95.9221	49.877	76.7241	87.9231	84.4367	73.2929	83.3063	53.9052	56.9645	85.5717											49.5554	73.0707	77.5309	68.1877	58.5058	51.3446	55.793	96.244	39.9233
2	99.047	82.3132	92.3398	62.7359	99.1517	77.388	94.6982	75.3516	75.5093	79.1673	92.1762	63.6696	92.2631	75.2437	71.0609	89.1535	95.4604	96.8747	74.8592	87.1837	79.9369	51.6163	78.596	89.6284	85.9384	74.963	84.6083	56.5271	62.7581	85.7662											53.689	72.5914	77.3738	72.0051	57.146	50.6716	59.3262	97.0589	40.4716
2.1333	99.831	91.4386	92.3464	60.5884	96.847	78.2571	93.5975	82.7314	75.7217	84.8789	94.7478	70.474	97.752	74.6454	76.8933	85.3849	92.7285	98.2706	69.3722	78.7839	69.2951	56.342	74.698	88.3092	84.9668	78.1787	82.1042	57.5474	66.5846	86.2348											59.7342	72.4154	72.8166	69.1692	59.0194	51.0863	61.7303	98.6405	42.5703
2.2667	100	97.2172	100	58.679	97.588	77.5482	95.5995	83.9725	75.6035	100	98.9818	73.1456	95.6152	83.2179	81.8294	78.9215	89.0272	98.8674	66.3139	69.6743	71.2196	53.3903	76.8727	84.2799	91.8715	74.2243	78.3932	59.9168	69.0442	90.0917											62.2568	75.3873	72.2572	71.619	60.8052	49.8382	67.0801	100	47.7221
2.4	99.8713	97.1053	97.6643	55.9056	95.67	77.3961	94.3695	82.9557	77.4978	92.7226	98.7438	72.5074	95.8264	71.9183	83.7849	77.6175	94.4331	100	63.1716	68.4222	66.7171	57.4773	71.2785	87.0963	92.7499	73.4825	74.714	64.3671	69.5077	95.6344											65.2945	75.725	72.0905	76.9281	60.0883	48.306	73.1319	99.9403	50.9103
2.5333	96.6295	93.2856	93.439	53.2416	92.0592	73.8272	92.4761	82.2843	84.3268	76.2048	95.3796	70.8107	98.6195	66.1695	86.5878	79.124	81.5881	99.2403	60.5678	66.6092	61.039	60.1437	71.9874	87.959	93.6984	69.2256	78.4451	73.6939	71.1089	95.1751											66.5142	75.1909	76.5243	72.6449	63.6366	46.7392	75.722	95.8816	51.3571
2.6667	92.3999	89.6827	93.4558	53.8337	89.0822	75.023	79.0229	78.1728	82.0455	82.7819	94.9112	75.2724	96.2548	61.528	84.6953	76.1948	76.0739	97.3176	64.0417	67.035	60.2268	62.9622	74.1479	85.9783	95.9844	72.2829	80.8965	67.2384	69.3439	94.8641											68.2963	74.7472	73.5516	73.9223	64.4642	45.0148	84.3733	97.4043	51.0934
2.8	93.4827	90.8768	92.3876	54.6922	80.5512	79.3463	77.3319	73.9848	88.8475	87.2422	91.7795	72.6438	100	62.0621	89.7383	76.8242	74.8452	89.2209	60.6441	61.9853	55.5203	65.6867	76.881	90.8903	96.2473	71.638	85.6146	67.5815	66.4402	94.3108											70.5902	73.1491	78.1038	70.5493	70.8518	44.955	82.7173	95.4268	50.5749
2.9333	95.5399	91.6556	93.1037	56.6452	76.2857	80.3029	77.5307	71.2891	91.135	90.7387	84.4751	72.2189	95.9126	77.2964	89.4736	73.9154	80.3624	95.3439	59.2497	61.4962	54.4278	68.3364	79.244	93.1702	96.3161	71.6288	81.7356	66.264	65.046	94.7367											69.2294	71.5157	79.6429	68.7609	72.7165	44.5462	84.8881	92.9787	51.3665
3.0667	95.1701	91.244	94.9889	60.9378	74.2809	80.0648	74.4867	69.6358	99.9973	87.6217	86.1077	64.4959	92.666	86.7708	90.0848	73.6825	79.1891	93.3804	61.2356	61.323	52.4839	72.9329	78.2192	90.3678	95.2139	72.0655	84.0234	69.4029	63.1042	95.7819											69.1282	69.2292	82.4675	69.7323	74.1159	44.8339	90.1163	95.7325	47.1092
3.2	95.1301	96.0145	92.9868	68.962	73.9577	80.9849	74.3592	71.309	99.9922	87.8468	87.237	64.8357	92.1482	91.8387	90.2699	73.2822	91.7165	89.3991	61.352	66.1065	53.7234	82.407	77.3895	94.4869	96.4583	70.9742	86.3464	80.855	67.7843	95.4692											67.0645	69.4539	86.5566	73.2514	80.5252	46.6551	94.9199	95.8924	46.4118
3.3333	91.2974	100	92.1432	76.5175	75.7646	85.2089	75.5171	69.5643	94.4336	79.9825	87.106	64.6007	91.8689	95.7796	95.3142	72.5464	85.9503	91.7902	68.4267	67.2377	50.3055	86.9172	79.4046	90.2457	98.5081	75.6722	86.1988	100	66.1809	93.992											62.0826	72.3839	90.8203	71.19	78.9684	46.2265	90.873	94.5766	47.445
3.4667	91.0816	94.5322	95.825	80.1046	73.598	87.6606	83.0664	73.619	90.1821	85.904	89.5603	71.9048	93.1726	96.5092	94.7544	79.2806	82.5801	91.5478	72.0201	64.5931	50.7301	87.2494	75.9371	92.4836	96.7735	76.7129	86.1924	98.1899	65.6144	92.909											62.1368	74.5552	88.4382	73.7108	77.3498	45.1758	90.8432	91.6795	43.5
3.6	92.0685	88.1195	95.8518	79.2204	76.24	81.4061	77.8228	70.3214	89.9707	82.4364	96.9187	82.0322	96.5347	96.543	94.817	76.661	87.0262	90.2499	76.4589	63.2507	55.8046	80.9254	75.9085	90.8396	94.5372	80.0733	89.5743	98.116	72.1235	93.4585											63.8721	77.3707	90.4841	73.0079	77.9375	47.8835	93.8356	91.8845	41.7814
3.7333	92.3834	84.418	95.6367	76.4577	76.2824	83.454	83.5593	70.5882	89.0009	82.9382	94.522	70.8798	92.9162	92.1998	96.3322	72.4579	91.4116	92.5041	81.7261	65.7141	65.263	78.816	82.6934	91.4452	92.8139	74.322	88.4334	91.1761	75.0197	91.1657											61.8896	77.9709	88.5786	77.7316	76.7603	50.353	89.5553	92.9156	43.5209
3.8667	99.1973	86.3035	91.4935	76.3	73.8571	87.5159	91.4668	71.8975	93.377	88.0745	95.909	77.934	93.0757	91.8014	95.1537	75.4903	84.2709	85.9386	87.15	61.5542	72.5877	80.6753	84.0949	93.9292	96.3629	76.5834	91.2495	85.4513	80.9814	95.1937											61.5521	79.0859	86.2858	87.0016	78.621	52.2654	90.8756	90.3482	43.064
4	96.0149	88.0709	85.5951	77.2069	72.8881	87.2082	93.1196	71.6529	99.6526	83.6196	99.0492	76.7962	96.9	94.2593	95.3165	78.9779	86.6452	81.1762	91.0436	64.3008	83.1622	82.0826	81.1582	92.9186	95.0226	78.8469	93.0329	82.2032	76.6358	93.0808											65.6124	84.1605	85.9696	82.9171	82.3135	55.7512	92.8768	91.0028	46.0014
4.1333	95.9877	86.1194	86.9537	77.231	67.1108	90.084	85.3165	68.3574	96.452	83.8828	96.1248	74.7045	95.5485	94.4679	95.6898	83.4577	88.9113	82.8209	89.009	69.2819	94.3486	87.9002	82.6219	91.2733	93.2147	82.9425	93.232	71.782	76.4763	94.7906											65.0872	80.3848	88.0371	84.6299	83.9735	57.964	96.9271	85.8663	51.6459
4.2667	97.0821	83.0742	84.3137	76.3237	69.4298	98.4087	81.2007	74.4494	99.3615	87.7921	95.0217	75.9457	94.0737	95.7734	97.6612	87.0642	77.6706	78.7542	81.8281	73.3558	100	94.1602	84.7288	89.7571	93.6499	91.9443	90.5061	70.9107	77.1719	98.6932											62.5266	76.8422	85.8169	80.8098	86.2595	62.1646	100	88.6774	52.2934
4.4	92.172	80.9785	85.7977	74.1454	78.5617	95.3952	80.1807	77.438	100	87.1612	97.9093	70.8096	92.1075	100	95.4799	87.6224	82.4021	77.6889	83.1837	72.2475	99.0213	89.3877	91.1439	95.8597	93.3109	88.6981	89.9424	71.4702	77.2232	96.9105											65.4138	82.2311	87.9521	82.3382	88.3914	71.0461	98.131	91.3213	55.0366
4.5333	93.2554	78.5861	86.9164	75.7207	75.9965	100	79.0184	83.0668	96.4651	85.768	99.3983	70.6149	88.109	98.2438	96.6314	90.1204	80.6437	72.9353	80.7421	81.2004	85.2518	93.9524	91.3279	94.8183	91.9349	87.8131	92.9153	66.091	76.0325	94.0948											68.1322	81.311	90.5346	80.6885	90.2705	74.922	93.1419	87.5699	60.0682
4.6667	90.8815	75.0673	84.8743	77.6261	76.5478	95.6584	75.4984	88.8109	87.242	87.429	96.4335	72.1785	89.0297	94.0656	91.0083	93.6178	80.1261	75.5178	82.4396	80.3016	85.8115	96.6646	88.0006	93.5295	96.1127	85.0417	90.8047	69.6086	79.3927	95.7239											67.825	81.7977	91.7425	79.6402	85.4495	78.113	88.6306	84.9479	59.5266
4.8	91.4757	73.3533	84.7139	78.1165	76.9376	88.0131	76.9449	90.7826	82.5538	82.8026	96.776	71.7328	90.386	87.3424	90.6905	94.2342	79.4491	72.2122	86.2347	77.9569	82.6447	93.4737	87.1926	97.5255	93.9961	91.0726	94.5211	68.4481	72.7147	93.6849											69.4228	86.9473	94.0098	78.6795	86.2148	82.1558	90.9616	82.314	62.2983
4.9333	87.0668	76.4538	93.2259	73.4143	78.2754	86.8263	73.1033	87.1525	76.6408	80.4916	97.5921	72.3654	91.1985	87.0546	95.9608	91.8896	80.5469	70.3589	86.2858	75.9398	91.6527	91.0903	90.0542	92.8043	90.8782	92.4892	93.9592	68.6075	78.1348	92.0518											71.4485	85.1976	91.9681	81.2996	84.879	84.2285	88.8503	80.5562	62.4703
5.0667	80.8519	75.9436	90.6213	76.1064	75.387	92.8621	68.308	86.3744	79.5644	83.7069	97.513	75.3811	96.8816	91.0523	94.6278	94.6952	70.6227	70.067	81.8354	76.1471	86.6008	90.0035	88.232	95.8025	91.0633	96.5036	91.2508	72.7398	73.8646	91.7453											71.0337	85.3588	94.5966	86.2466	84.0717	84.8289	98.289	78.3137	63.0697
5.2	79.2565	68.3705	94.8059	73.6864	78.704	89.0368	60.396	82.7627	81.9068	89.3742	96.2582	79.6452	94.8286	91.0519	96.7983	96.1266	69.4873	69.7166	83.0768	78.5615	85.2831	86.5089	86.9421	93.7024	95.1039	96.1672	95.874	77.7668	69.3073	91.3322											77.741	88.5502	100	88.1393	88.3572	84.4953	86.6848	77.7754	63.9861
5.3333	75.3083	65.4549	95.9529	68.539	85.7082	83.7134	56.3812	75.5779	78.8728	95.8624	91.9632	80.0694	90.7802	89.7868	98.5142	96.5881	64.3741	69.5251	89.4183	83.3582	83.6743	90.0595	84.7652	98.1562	96.5923	100	96.4734	78.8411	77.0299	93.4489											82.3322	85.4266	99.6919	89.2891	92.8712	79.9819	84.2611	77.5674	69.1791
5.4667	73.5275	62.0175	92.28	66.7574	83.6779	76.3737	52.6939	71.1645	78.3913	95.2951	92.2025	75.3514	89.9628	89.4124	92.968	100	59.2654	70.1871	93.9899	86.7734	85.222	87.8108	89.1302	93.9313	95.944	98.8104	92.4918	80.2649	76.4784	91.2888											76.0555	86.1464	96.1807	90.1353	88.9089	82.0135	81.4495	78.0359	71.7865
5.6	75.062	58.0306	93.8925	70.8218	85.6397	79.7038	45.8679	64.8715	77.1444	86.3926	100	71.8642	91.5609	88.3726	94.0544	96.8685	56.9406	69.586	92.8619	92.3474	79.8464	90.1502	88.2296	88.7506	93.6502	93.1774	89.9198	80.4237	74.7612	90.6429											79.8172	85.7582	95.1786	86.2178	92.3856	79.3064	81.9513	78.3488	70.7987
5.7333	76.67	55.4595	95.1582	71.3952	88.6662	84.5837	43.9061	58.3347	77.9954	83.37	97.3801	68.0888	88.9365	93.5632	96.9079	91.3933	58.1994	70.9711	89.0211	94.1708	80.653	95.4937	86.0219	88.7058	89.9385	97.6923	91.864	75.0808	77.3442	93.3855											84.9256	83.8206	90.4249	91.2541	86.9976	82.5399	81.4451	79.2274	71.5117
5.8667	82.7251	55.6143	92.5427	72.2515	93.162	86.2827	45.1841	59.3775	80.488	81.0282	98.8754	67.3781	92.3807	95.8955	94.0252	94.8559	57.3502	69.5776	83.958	96.405	78.8918	98.3326	84.1943	95.6999	95.4958	95.6992	89.848	71.6477	78.3889	95.1443											87.0366	88.4221	89.913	93.1883	87.7166	82.2645	79.2857	84.1884	70.9477
6	86.0977	55.9311	87.3609	75.2851	95.8913	82.5737	42.4345	59.0395	86.873	83.9505	99.7596	65.4242	87.4792	96.467	93.147	94.1361	55.8236	69.5942	75.1539	96.6089	77.4752	92.2171	85.6622	91.8837	97.3909	96.579	85.5976	72.1661	77.4709	94.5322											90.1312	88.4508	88.5813	92.6816	88.2925	87.7188	83.8139	80.9412	70.1266
6.1333	87.4277	56.1278	88.5257	74.797	90.485	77.8408	46.3737	60.2876	94.0324	88.0903	95.5786	65.1527	81.8041	93.6425	93.2742	92.1314	60.0342	69.6657	75.1668	100	77.1831	94.7151	85.2041	92.5009	93.6038	92.704	92.4493	70.84	82.5025	92.8766											91.2878	83.7806	90.3716	88.6829	84.5431	92.6128	80.6273	83.2922	67.2633
6.2667	82.2813	58.2562	84.3619	75.6633	89.6246	80.9944	43.1938	67.5523	95.4749	84.6907	91.1529	65.9911	82.8065	93.2068	91.4225	93.6572	60.6596	68.3956	80.1676	99.2203	73.3418	94.5732	84.0736	89.6832	97.013	88.0066	90.8274	65.1198	77.3775	91.6689											90.5258	82.5571	95.7703	83.3478	83.961	88.5738	75.2159	82.9769	70.0747
6.4	82.7321	63.3403	84.7112	78.3728	88.3537	80.5229	41.1433	68.9565	99.6431	83.7702	93.3491	65.0148	79.9767	89.3028	99.1994	94.4603	59.0666	70.0551	86.2637	94.3978	68.4642	98.4541	82.8403	92.3104	96.3481	86.8334	92.38	68.4962	80.2439	93.7968											89.0591	80.9867	94.7719	81.992	87.7486	93.674	68.9435	87.4549	74.7065
6.5333	80.1859	63.2109	79.2869	77.9048	88.9192	77.9533	41.3301	80.6516	96.0037	79.5094	92.7037	65.5541	72.2055	87.5849	93.3607	92.1451	54.8866	69.0893	85.0924	88.57	68.1615	93.7366	86.1599	96.5327	94.2153	90.0636	91.5931	76.2989	80.8825	96.7061											86.4509	82.9703	95.574	81.8413	86.4224	99.9115	71.1666	86.7452	69.7276
6.6667	83.4755	67.8254	81.3736	75.7974	89.4633	79.7085	40.5492	88.9364	95.1454	79.7334	88.4605	64.7009	65.9041	84.1229	92.1761	95.433	56.2196	72.076	79.374	86.0961	74.222	94.8603	88.9529	92.5684	100	87.9374	90.9342	75.2915	81.7862	99.5647											89.4149	96.4046	93.284	79.7159	97.2239	100	72.2121	85.3408	67.2953
6.8	79.5753	70.1967	75.7209	74.6519	87.7975	73.3811	41.6551	91.8421	96.0827	82.0813	82.5174	66.753	61.7152	83.8134	93.9051	94.2249	54.9029	71.6252	75.0844	82.1296	76.9148	95.7726	100	92.8784	96.8181	85.0765	90.5532	72.37	88.4824	96.6993											90.8547	95.8112	92.6501	78.0447	92.5771	96.3672	71.8106	89.9397	68.0433
6.9333	77.4516	71.4099	78.3303	72.4354	86.5265	66.5082	51.3898	86.6528	94.003	77.9909	82.2176	69.9011	62.3853	82.4133	94.901	91.2392	53.7066	71.4748	71.7378	78.3065	77.8466	93.7903	95.6804	96.3043	96.0686	87.8819	90.8735	74.9816	87.6212	93.6942											94.2277	90.7401	94.3133	79.621	100	92.6286	75.1346	92.8025	68.685
7.0667	86.4971	72.2883	79.4966	72.1137	90.9276	58.2559	52.0832	86.5864	91.0821	75.3124	89.4046	66.8119	63.3121	83.4618	94.6757	94.4133	52.357	71.464	69.7527	80.3913	79.2639	91.9387	95.1568	97.3632	95.0167	87.2867	87.8183	72.3899	90.5573	95.9033											98.6158	82.89	93.831	79.2352	91.403	89.9586	73.1043	91.2135	66.6883
7.2	85.2708	75.1592	79.8158	74.9005	90.5226	58.2811	45.7732	92.4612	91.19	74.7824	87.8392	65.5526	63.4254	90.7918	94.9534	87.8026	51.8104	69.0152	66.3295	84.4692	81.8964	92.6493	83.6186	96.4832	95.1717	83.2577	88.1832	69.8229	91.5731	98.5872											99.7642	76.9026	93.9605	78.2302	83.6383	85.3056	77.4281	91.9317	66.0156
7.3333	87.291	76.5338	84.2789	74.4276	90.4815	61.3244	45.5038	89.703	88.0788	76.4592	81.041	64.9365	64.5136	90.5619	94.7142	84.0036	52.0718	67.7616	70.4331	91.2157	79.3678	93.9315	71.1858	93.1286	91.3752	81.8457	88.4895	72.379	88.2548	96.9617											100	77.0883	93.8771	76.8849	79.51	80.4765	77.4617	87.6275	68.2821
7.4667	82.1692	81.0469	78.141	74.4797	87.6152	64.5512	49.1315	91.392	89.5393	74.8309	83.3642	71.6686	65.3963	90.3956	95.2827	85.1279	52.4406	68.6398	73.2033	89.3675	71.2836	92.1652	70.2362	94.1911	92.6816	81.2209	92.9765	70.3992	84.8576	97.0401											97.5315	74.6291	89.5688	76.0662	79.4813	79.2832	79.8996	84.9352	66.3549
7.6	83.125	86.3951	73.9195	74.7682	83.138	68.739	52.7143	95.0944	91.6311	75.2648	85.9784	72.5948	64.918	94.2189	90.3444	82.8182	49.6328	68.9569	73.5609	85.932	66.3875	95.671	67.717	90.6402	93.2589	80.4103	99.1411	74.5786	80.1181	94.7105											94.3108	75.9844	89.5709	74.6183	82.2034	75.4995	74.2712	81.421	68.9158
7.7333	80.2256	86.3801	74.2866	76.1412	84.4725	71.5765	63.6518	100	89.8084	73.344	88.7761	76.5862	66.5469	96.1817	98.0998	81.6345	53.9845	69.3996	75.028	85.042	65.7315	95.3215	70.3149	93.9797	95.2761	80.1074	92.7289	74.002	82.9542	94.394											97.8248	81.8093	84.8809	76.8749	77.5114	67.9849	74.5338	84.9441	69.2083
7.8667	77.1743	84.4239	76.0783	87.1195	87.2269	61.899	56.0322	98.8504	91.2244	68.9541	84.8762	82.2697	69.2529	91.7463	100	82.6288	55.2963	70.4933	74.0726	83.5523	61.3891	94.5918	70.0412	93.0042	91.5796	76.9516	91.7856	73.0942	88.2106	96.7566											96.6524	84.6553	83.1207	76.8012	82.2071	60.9215	71.9645	90.2763	76.8928
8	82.7618	81.793	78.0445	92.6203	87.4276	63.6637	52.8971	92.9594	89.7321	70.3476	79.5201	83.35	65.3604	92.212	99.5476	75.318	57.9764	70.7859	75.054	81.1203	56.6185	96.2586	72.3064	89.876	91.1165	74.867	100	75.9582	87.9148	100											94.1818	87.013	81.1674	77.252	85.3421	61.1751	70.6001	86.6039	78.2409
8.1333	78.6014	79.3553	75.7669	98.5214	90.1757	64.2996	56.4884	92.2177	87.7976	74.8196	80.2572	86.8958	66.8493	95.2569	92.9884	77.8547	57.6881	71.3448	75.5141	81.7336	60.0582	94.8113	76.4574	90.9333	92.5072	70.8311	95.8432	78.7686	89.2173	98.126											89.0685	89.6708	80.731	80.0982	86.9884	63.229	74.2181	92.369	83.4589
8.2667	76.4754	80.0681	75.7846	100	89.2503	68.1177	55.2628	90.1241	94.2166	72.8156	79.5317	84.6746	66.7502	97.2634	91.7796	83.3721	53.9454	72.0904	74.0138	70.493	62.4614	93.6357	75.1809	100	96.6072	71.4856	96.172	80.8637	95.9262	94.1762											90.0523	89.5871	81.0965	77.0925	79.4539	60.6186	69.3392	92.2459	91.6345
8.4	77.8798	80.659	73.6608	99.585	91.5008	72.1089	53.3154	94.393	88.5141	72.2681	76.8164	88.7075	66.8811	94.0917	87.8045	75.3695	50.3708	75.2693	74.8111	73.7727	70.3712	90.3118	76.1353	90.2494	91.6167	71.0121	94.6082	78.695	100	97.6364											84.7726	94.3636	77.6552	76.8011	80.6163	60.0258	71.3303	91.0703	100
8.5333	73.9682	87.1883	67.562	90.5731	95.9939	66.4631	53.8323	92.0029	92.6453	72.5127	74.5831	86.6726	71.1536	97.574	90.4808	75.1654	51.1411	76.9075	78.0097	80.3392	74.8159	90.5585	75.7419	88.8288	96.1026	70.3446	93.5425	86.1454	91.947	95.3											82.3441	97.335	80.7885	76.837	78.0746	60.3944	71.577	93.1204	99.8074
8.6667	75.2675	84.9234	66.4391	90.1218	97.2494	69.288	53.9119	91.1712	96.3691	69.9388	74.3282	84.5406	74.0713	89.8674	95.2394	80.2849	52.5889	77.0413	80.809	80.7702	82.1667	100	82.5427	89.5337	94.94	68.9158	98.1947	83.8507	93.7428	97.0185											85.8097	98.0771	83.7427	76.013	74.8551	56.3125	76.4194	92.6399	87.4264
8.8	75.728	87.6654	67.0822	89.6564	94.6981	84.5731	58.0976	85.0582	94.3353	69.6842	70.1884	84.1842	77.9945	86.8468	93.3953	78.4126	51.5355	74.6784	82.3174	80.8438	88.6715	87.3663	76.8685	93.1374	89.4086	65.1093	93.9169	85.7184	94.9728	95.2883											81.2246	100	80.5052	76.1215	68.7988	56.3218	77.6901	91.6823	82.3558
8.9333	70.7644	92.2851	68.8599	85.8818	96.3922	83.6838	60.5948	85.3827	90.6502	70.4287	73.1074	83.4917	82.089	92.1563	93.3431	82.0059	54.1089	72.8432	84.9542	86.2559	90.7794	86.1878	76.8208	88.7007	89.7213	64.4273	96.2369	80.3396	91.2082	93.9752											83.0163	94.5138	80.0053	78.0057	74.8923	57.0191	76.6334	95.2161	70.6545
9.0667	71.667	89.2537	67.5105	93.1775	97.532	88.034	58.3391	85.7835	89.7243	68.4507	71.7915	81.367	79.542	91.3639	92.1047	85.9132	57.5977	71.838	86.0315	88.0694	86.2315	88.4403	78.404	89.601	95.8541	63.9665	91.4495	75.6202	89.9818	92.3525											81.2276	88.0538	82.6461	81.4369	75.8593	55.3822	77.0873	95.0609	64.4922
9.2	76.8118	82.8213	72.2234	79.8984	87.9064	90.6756	54.5343	84.8112	90.6829	67.6731	66.2194	79.6425	79.6555	92.6925	86.816	80.548	57.4067	72.5879	89.378	86.3578	81.5378	80.5622	79.2757	93.4967	95.8499	62.8751	92.2399	86.6513	90.0594	94.9401											75.8471	83.3756	79.1672	83.5882	83.5574	57.9779	82.5304	92.1253	61.6247
9.3333	77.551	87.3652	69.7503	79.1297	91.3693	83.9892	57.2109	89.3963	92.1477	69.0343	64.6481	84.0832	80.3683	98.1377	87.6802	83.826	58.8839	71.5334	88.2973	80.9703	73.1264	78.6237	75.7455	94.2744	93.9867	65.0695	95.0814	77.6142	88.2056	93.6549											73.9192	77.2939	77.2764	87.4375	87.7267	55.6778	77.6097	86.9032	57.0123
9.4667	83.1909	90.743	72.0126	76.8356	94.6984	84.2443	58.9298	86.0902	93.5421	70.0643	63.4005	89.3818	85.4641	92.8994	88.6324	81.3069	56.2449	70.7349	91.7112	85.4262	62.2721	79.9798	80.8704	87.0147	90.5922	69.7634	94.232	80.5798	95.8412	95.6903											74.9662	76.356	74.5275	91.5865	86.5642	55.2402	71.3707	93.8051	55.1168
9.6	80.8803	85.7918	74.7492	78.4251	94.0532	93.6453	62.4944	85.4706	93.2616	70.6857	61.2004	93.5026	84.8957	84.0161	93.4335	81.5703	54.6908	68.5324	96.8658	84.603	56.9794	71.1924	87.381	91.3953	89.6818	72.4741	92.7948	78.3783	84.1471	97.3494											79.6194	76.314	75.8126	88.0262	84.5583	58.6104	70.0305	89.2406	56.2029
9.7333	77.1508	84.0424	73.7414	75.2875	100	96.8061	64.8399	83.8476	97.6769	68.7076	59.5267	97.8075	83.5403	79.6894	90.3181	81.4222	56.8457	68.7287	100	82.0899	50.9516	66.8517	87.3398	90.4711	85.9753	72.494	98.1504	80.342	80.6163	96.4391											84.6388	76.3195	80.6915	97.6592	88.0988	58.8789	67.4392	92.188	56.9624
9.8667	84.249	86.8392	77.0947	73.2189	89.234	95.7473	64.1786	83.0833	95.9919	72.7754	59.2621	100	83.1713	83.2776	93.4001	80.9724	57.7986	71.6668	96.8769	79.5701	45.2394	64.0662	88.3001	95.5363	86.7939	73.0773	92.6869	76.8357	78.9034	86.7581											79.6746	76.1662	79.7642	96.3701	90.4936	55.544	66.701	88.0616	54.5803
10	90.2015	91.6071	76.0924	72.1598	89.4576	95.5711	65.3835	83.1203	95.2778	70.7443	58.9613	95.146	82.7887	87.6443	92.8525	81.6721	54.2664	74.8533	84.9561	81.9916	44.9898	66.185	86.6938	93.0743	86.7938	77.8064	93.7044	79.6054	80.643	91.1874											79.2524	71.0581	79.6823	100		57.7221	64.8319	89.5184	53.1573
[truncated: 26 more columns]
