# Supplementary material for: The Caenorhabditis elegans Tubby homolog dynamically modulates olfactory cilia membrane morphogenesis and phospholipid composition
Source: eLife. 2019 Jul 1;8:e48789. doi: 10.7554/eLife.48789 (PMC6624019; doi:10.7554/eLife.48789)
Supplement: Figure 7—source data 1. [file elife-48789-fig7-data1.xlsx]

## Sheet: Figure 7A
wild type	tub-1(nr2004)
255.029	114.31
212.034	333.952
188.816	118.739
202.12	156.048
180.299	75.6757
181.43	123.922
146.724	182.174
271.749	112.358
249.324	33.932
337.251	20.8117
168.343	33.0677
168.28	143.686
339.59	152.797
207.985	122.328
233.57	175.922
2.599	153.073
159.957	24.4347
112.715	109.179
48.8457	71.764
216.975	74.5313
141.681	173.338
114.565	11.4207
75.9567	61.7833
61.5793	149.415
121.512	218.386
9.348	125.353
83.9177	81.1747
106.406	63.725
230.469	97.203
6.17367	28.15
121.565	10.4637
3.295	4.488
180.121	0.802
171.435	16.7583
120.899	17.541
131.787	30.8553
67.7677	-0.961333
238.207	-0.367333
2.097	74.4153
107.043	19.3193
-22.0193	33.942
66.976	28.2997
244.469	84.976
260.879	119.226
204.686	63.4247
85.227	185.372
141.275	15.918
33.3917	11.2417
101.295	-3.64233
63.6427	61.512
105.826	26.4487
143.957	129.792
62.2897	136.599
134.278	19.7393
68.106	-9.23667
-13.797	143.348
37.1497	139.667
69.7533	-6.618
93.309	111.15
	-0.710333
	164.464
	18.749
	99.691
	72.454
	43.759
	-23.0433
	3.43433
	-5.22233
	-0.700333
	-25.6257
	-8.768
	63.9087
	56.2263

## Sheet: Figure 7B
Distance from cilia base	wildtype																																					dpy-23(e840)
0	50.1881	50.1144	51.2633	27.6965	33.5365	37.7741	53.2312	31.9017	61.4967	30.4716	33.8716	24.6425	27.4252	29.3823	39.4984	20.4614	19.988	16.6159	45.4032	27.1443	18.6467	13.8428	42.9898	19.7584	32.3204	37.5096	32.7888	40.7816	21.01									33.2936	24.3541	26.0547	49.968	25.5559	39.6262	31.2549	41.5428	29.1734	22.7241	19.9333	52.273
0.1333	61.7852	62.6979	54.4454	38.231	37.0638	51.7159	80.9581	40.5044	69.2912	33.3894	45.9286	34.8854	37.004	38.1124	55.2004	29.4238	34.5692	22.0312	52.7485	36.1962	27.9612	21.6616	55.8007	21.6758	40.2774	39.8574	48.4143	58.7265	29.1161									43.6193	33.2346	35.1572	58.721	28.6993	43.5616	38.1093	50.2196	39.4764	30.3561	29.8471	60.5287
0.2667	65.9095	59.1867	57.4494	44.2452	40.7042	57.4539	98.7368	45.5495	74.426	40.3893	57.992	45.8074	47.1142	47.5424	65.3061	43.4356	45.4028	26.1042	54.6517	44.1797	43.5486	35.7493	65.5671	27.9367	42.6515	43.2996	58.2889	60.3468	41.8502									53.4777	49.2012	50.4552	69.1328	31.6556	49.0812	43.1074	55.0873	47.0491	44.6451	39.9976	64.028
0.4	61.5267	56.2169	62.3393	45.477	40.985	58.5322	95.4805	46.9377	72.5031	45.5449	67.6084	56.5929	54.4614	53.155	66.4547	50.9778	49.9211	30.4489	59.9526	47.8513	50.4417	47.5554	63.441	34.9538	39.6159	43.7007	62.0031	54.6289	47.8576									59.4908	56.9635	60.7037	78.1326	32.1992	54.4676	50.6904	57.4051	53.0506	62.7369	51.7861	71.5262
0.5333	58.0013	54.9518	62.6034	43.5688	42.5863	58.3748	90.024	46.8244	73.3236	48.6625	76.4834	57.8735	57.2366	58.1154	64.69	57.8474	49.5771	33.4726	63.7026	50.9393	50.6779	50.2484	67.414	42.0176	41.2866	41.1036	61.0533	54.1967	49.8235									58.9918	59.305	65.103	75.5556	34.6592	54.8216	52.1909	56.3915	55.2376	57.5788	57.3634	68.8737
0.6667	59.6477	55.3486	60.728	43.6092	44.9113	58.1729	82.7235	46.1439	73.3083	52.3992	77.2655	57.0791	57.4802	57.1071	69.4015	63.7737	50.4964	33.2658	65.16	51.993	49.8492	47.9299	72.133	47.7729	43.541	40.4908	60.4553	55.3996	49.6549									60.6988	63.1698	67.5592	74.054	32.9886	54.9017	49.9539	57.5868	56.2678	55.8103	65.6223	65.8007
0.8	60.2783	61.6114	61.1973	45.3989	46.5992	59.7448	89.7946	47.3681	74.8401	55.6563	78.4482	64.0074	56.7325	55.0001	70.1487	70.3034	48.4184	33.162	66.9631	54.7721	50.8635	44.7496	74.3174	50.7153	47.7775	40.2383	60.3814	67.8584	48.3419									61.2113	68.025	63.0204	74.647	33.0995	58.4995	48.593	59.7187	59.3196	56.2448	64.8003	65.289
0.9333	64.7416	66.8137	64.4015	46.4467	41.8428	61.8318	98.1186	42.8125	72.3445	56.4621	77.7696	62.2279	56.0878	58.0852	76.1444	66.0902	50.7887	32.8642	65.2877	54.6788	52.7563	47.7276	71.1518	52.843	47.2046	44.8616	65.2558	72.6575	49.8366									62.5793	70.2846	63.8729	73.2905	33.9439	57.1954	47.3201	60.7617	61.9325	56.596	62.1401	68.1356
1.0667	65.9774	76.3427	69.4428	47.9705	46.6216	69.2707	92.0732	41.1128	73.699	53.4761	81.4939	59.0487	61.0806	57.9603	77.5397	62.5233	50.7089	35.2168	64.7572	51.3788	52.2559	50.0564	70.598	51.2833	46.2084	53.2665	75.1508	73.9358	49.1833									62.355	72.1728	67.687	79.5215	33.8286	57.4171	47.2434	61.5651	62.676	57.0096	61.3195	65.0752
1.2	66.3438	85.4077	74.7221	46.9775	54.9309	79.1005	84.2173	43.8081	80.1514	54.3085	81.9435	62.5091	59.0983	56.127	80.6705	59.3371	52.1593	37.0101	58.7631	49.6212	50.9639	57.3585	71.67	45.7651	46.0309	61.6306	83.2955	71.5324	54.6273									59.8678	69.5663	70.2707	74.5875	33.2924	59.0138	46.4573	61.8745	63.138	55.3386	58.9578	65.0803
1.3333	66.519	89.1792	82.4826	53.935	58.9218	84.305	87.0182	54.7408	81.8949	56.3681	79.9086	62.3927	55.1824	55.7726	82.1529	58.9958	55.6504	36.4397	59.9463	47.8195	49.5279	66.484	73.098	43.6462	47.3014	69.7099	91.4874	68.6796	64.1023									61.3756	71.3412	69.388	70.2051	35.5186	60.044	48.3109	60.6019	62.4107	57.467	58.848	67.0169
1.4667	69.4989	91.0138	92.1288	68.3963	63.2775	100	88.6512	67.5097	86.9111	54.7917	77.5032	64.634	59.1212	57.4962	88.041	62.0889	60.6613	40.0827	63.5822	44.4141	52.513	71.9505	73.8063	46.6539	49.6313	72.8364	97.5429	65.0035	80.9467									64.126	73.6993	69.4504	66.5811	36.4377	72.7045	46.9975	59.4498	61.5222	57.1729	59.2426	66.8131
1.6	70.7425	89.4512	96.4522	84.2484	64.6711	95.8428	98.0506	80.7915	93.75	54.9686	74.2191	65.9713	64.8923	64.6183	86.8828	67.7813	67.8617	46.6965	70.7576	47.3835	59.6258	77.5276	74.9489	58.4966	52.847	74.0814	99.4875	61.0627	98.3142									65.8879	74.5572	71.0268	62.1524	36.8784	82.9285	49.2887	58.8269	63.9056	56.6065	57.592	65.572
1.7333	74.3898	88.9919	96.4829	96.0792	68.2387	97.5825	97.1769	84.8015	97.3804	60.1814	70.4609	71.1175	76.7725	65.3851	84.007	82.0636	68.9839	58.356	84.8777	60.8315	70.7819	83.1834	73.519	69.0069	60.1015	75.3482	100	59.8956	100									68.1011	81.8469	70.8491	59.7733	37.0119	88.7653	53.2104	60.6679	62.9532	56.9581	54.9293	65.0257
1.8667	74.374	93.0995	95.7616	100	70.7918	88.2597	98.5198	84.6251	93.0487	65.5829	68.7039	78.7521	93.0562	76.9651	81.7865	89.6979	74.2376	61.0288	90.7069	77.0466	79.826	85.9389	73.2848	85.5891	66.5168	77.1929	99.7134	59.9779	99.5536									69.6821	76.4106	67.2037	57.4685	36.2966	93.0682	54.1248	57.8736	59.9923	56.8415	53.3185	64.7352
2	72.7696	92.6738	96.4727	99.2087	77.5379	86.6766	100	82.3526	92.5266	68.7438	74.0093	90.0934	97.0652	84.6955	82.9277	96.6281	82.5483	67.8582	99.7041	84.5999	82.35	87.4853	72.894	99.407	73.9406	80.4543	95.564	60.4488	99.3329									69.3819	61.7068	65.0359	60.502	34.9805	100	55.4158	57.3342	59.2572	52.319	52.3179	64.241
2.1333	72.3539	93.5084	96.9419	93.6694	89.2436	85.5821	99.5283	81.8994	82.8248	72.5692	83.1295	88.3814	94.4344	96.0918	86.9291	95.3116	88.5475	65.3919	100	88.4696	87.1215	86.6956	76.6286	97.0988	85.9917	89.5427	92.3833	62.6067	95.4074									64.7894	62.0272	59.7168	66.1219	37.8064	97.2808	60.8307	55.6941	59.956	48.1149	54.7782	63.444
2.2667	73.6332	93.4095	95.3604	89.0817	99.1591	85.7232	94.8476	81.8939	84.1109	77.8546	86.9326	93.5109	89.5366	92.8319	86.3841	96.5616	92.615	64.5464	98.3447	92.6649	85.428	88.0837	70.8277	96.7866	81.0111	95.8477	94.6387	64.1661	95.547									63.8709	63.5003	55.9538	71.6728	43.7566	90.5748	70.1306	59.2986	60.2113	50.0957	57.0966	65.7037
2.4	73.7821	94.1709	91.2421	88.6949	100	84.6305	94.3332	79.2435	83.8832	84.5956	90.4892	98.0351	88.406	92.4498	89.654	98.9539	96.5648	60.8948	93.2529	89.7104	81.8792	91.6344	72.9727	95.2879	79.3142	99.0352	91.723	64.9858	98.1738									68.428	70.5293	58.9129	68.7634	46.7761	91.9113	79.6223	67.8875	61.6913	60.4925	59.8979	62.9531
2.5333	69.8839	92.2604	87.1075	87.9528	94.2585	87.5945	87.4339	80.1038	82.3352	86.1652	94.9696	98.4387	84.1329	94.1712	86.1317	99.0361	96.5436	59.6674	85.8396	85.4657	76.7039	92.5594	69.355	92.5635	77.4605	100	88.2071	68.4741	98.8321									72.3151	76.3192	67.7502	71.2463	54.3789	90.7929	84.5772	75.3157	59.9461	68.772	71.2577	60.7913
2.6667	75.167	84.8974	86.7587	86.4112	86.2982	91.6936	86.2107	84.7639	85.792	83.2434	97.1973	100	79.5004	95.3755	78.5293	100	100	63.3986	81.9235	89.1561	75.592	93.17	70.6568	98.5205	78.8506	98.509	87.2505	67.8002	95.7484									74.7433	75.3141	79.7221	75.1341	61.7832	90.7228	89.8079	75.6639	59.8212	69.2001	73.1371	62.5362
2.8	76.3834	84.4261	87.6139	81.9927	82.657	86.6008	87.6186	85.7658	89.1095	80.7443	100	97.1515	81.7794	96.2989	77.8369	95.023	97.608	65.1512	84.2637	81.1369	77.6603	94.0944	74.4917	89.2465	79.4681	97.3635	87.1005	70.4245	93.4884									80.0894	77.2727	87.071	74.2675	63.9166	89.4386	93.0679	78.1283	64.5725	65.7027	80.0187	67.4597
2.9333	80.498	83.9006	88.0567	81.1459	75.7885	87.135	87.7789	87.2491	86.4148	81.9164	99.2023	97.1685	82.5328	95.9367	77.9994	87.4702	95.8668	68.8413	84.0226	88.5098	71.6946	95.9274	76.475	89.4375	82.1695	93.9884	89.9985	73.317	90.1627									82.9151	79.0332	92.6795	73.7118	64.2817	92.3659	95.1738	80.25	73.0903	71.2949	82.1015	76.4225
3.0667	85.9557	86.9597	89.5466	79.5964	75.3776	89.354	88.0458	85.2397	90.3172	81.9716	92.097	90.6	86.1115	97.4913	83.1629	81.1517	95.1606	72.0751	78.8695	83.6176	74.6443	100	73.9825	92.3545	80.1495	91.9579	91.5939	76.183	88.338									82.1129	75.8746	92.6298	72.4831	62.4499	86.0235	93.6245	81.2765	75.1013	82.3988	85.0311	85.2914
3.2	82.1304	86.7945	90.817	79.4397	76.5685	89.2277	86.5688	92.2708	85.9809	82.688	87.6674	90.9258	85.5171	93.6799	86.1105	77.0954	88.8057	78.9608	75.6449	83.3118	76.75	99.9082	78.854	95.3189	79.1115	91.0935	89.9547	76.0362	87.9896									83.8535	72.4912	95.1019	76.5854	65.5363	81.5828	90.531	82.129	78.872	87.8444	86.2156	91.4295
3.3333	80.1842	84.514	92.0601	80.2477	78.5711	80.9793	85.5602	93.0071	86.672	84.5021	81.4054	90.0744	85.8422	92.7552	81.8793	81.5768	86.8107	81.9828	71.8878	83.9925	76.7159	92.4884	69.4899	93.5173	79.6583	88.0978	91.0361	77.9669	85.9301									82.9026	71.5076	96.5258	83.1177	70.9841	80.1765	86.467	83.6915	78.0539	89.1563	86.7069	89.0546
3.4667	80.5537	89.3794	97.2058	80.7966	78.4193	87.2145	88.6729	87.8481	85.7919	81.2418	76.6329	88.872	91.6915	87.889	84.8162	86.9864	85.2406	86.5426	71.5285	83.2389	77.3022	81.398	72.158	93.4012	84.5023	86.2733	88.4169	78.9914	85.3275									86.767	72.3235	92.2057	84.5372	75.4354	79.1125	87.8889	83.4807	75.689	88.4214	82.8513	89.2511
3.6	78.6075	90.2756	100	83.581	75.3245	89.0891	86.0338	86.8372	88.5793	78.4443	70.137	88.0379	96.5613	85.0284	87.6286	93.3564	81.5915	92.5667	75.6779	85.7264	79.5108	67.5907	71.6761	98.3722	85.9451	87.9469	87.1152	79.6455	83.5976									88.1659	74.9848	91.1324	79.6773	73.1103	82.8569	85.6881	83.2879	81.9376	94.0722	82.9834	87.0326
3.7333	71.4383	87.1521	95.667	82.1538	74.4943	92.9521	84.7378	84.8376	91.6204	80.6839	66.6485	93.7105	99.475	80.1878	87.3276	92.8706	79.963	94.1866	71.5487	88.4277	81.1333	68.7237	70.8386	99.6299	88.3436	90.5753	84.3736	82.3944	79.5019									85.5324	75.2239	90.7838	76.9604	72.2368	87.7304	79.5713	83.8194	83.4159	99.9364	83.0066	84.515
3.8667	70.2662	91.6751	94.3321	78.9633	76.4564	94.6542	78.548	82.8915	94.4485	80.3051	70.4601	95.634	99.1978	78.1897	86.9829	96.77	80.5717	97.7388	69.51	87.938	84.5525	70.8273	74.117	100	89.7696	90.7619	85.2763	86.1904	79.7847									90.3778	72.6043	91.3453	80.0507	72.8285	87.7938	80.1203	87.6552	85.6794	100	83.5965	87.7028
4	71.5695	91.452	89.8381	75.4496	77.4849	99.688	80.3784	82.9001	98.2915	80.5342	70.6664	96.6071	95.4289	79.4659	93.0896	94.5771	80.2334	92.3574	68.6532	85.353	88.3668	73.4137	73.7458	90.1189	87.0269	86.0899	86.8565	87.5513	77.9871									85.7835	72.6501	94.1344	80.3503	74.2074	88.2903	77.02	85.4857	89.1404	93.1231	84.2972	87.9149
4.1333	73.4346	94.7895	80.5939	73.2168	75.7753	98.2137	86.4162	82.8397	96.9853	83.3509	70.4278	95.8905	94.1462	84.0656	91.7024	95.3917	82.0516	99.2136	68.3923	89.3184	88.6647	78.0915	79.6856	91.7603	80.9929	81.3782	89.6332	88.1938	76.9417									79.4621	76.2737	93.6999	80.964	80.0517	88.9963	80.6142	85.1128	87.3009	90.7225	85.9175	89.7509
4.2667	74.7939	97.2899	77.8283	72.4462	76.2188	96.9312	82.7655	85.3074	95.81	84.7002	72.4581	93.5796	93.5126	85.4188	90.2228	90.7006	81.3611	96.9592	72.0474	83.6985	92.6698	79.2505	81.7334	85.1459	80.1494	79.2886	92.0473	86.6434	77.0411									79.3009	77.0759	96.2748	80.8095	75.6654	93.8721	79.7754	87.5397	84.8908	86.6737	83.8528	90.3923
4.4	78.1138	99.7698	77.349	71.6708	75.6087	94.9697	78.7318	82.2167	96.3244	91.8174	74.3851	83.4419	96.2026	90.0366	89.5357	94.1672	82.6282	97.5703	71.6067	89.8464	93.8997	79.2642	75.8832	78.8884	79.0772	78.771	96.3955	88.2378	78.7121									80.2935	76.9855	100	80.0244	75.1545	87.6094	79.2425	90.8727	88.8637	84.0049	83.9717	91.8903
4.5333	79.8855	97.3594	77.9079	70.6418	73.048	95.0297	78.6098	80.7731	98.1493	97	74.5199	77.0307	89.0029	88.0274	86.5005	98.9694	77.3183	93.6247	71.3369	85.1424	90.751	74.9159	82.3461	73.8647	86.2715	78.2321	95.7324	89.7397	74.897									81.3145	71.5162	98.5406	79.7016	73.4511	89.4447	80.0731	90.5125	94.5526	85.4976	81.989	93.5404
4.6667	77.1749	100	77.0229	65.7488	70.88	87.7284	77.6315	80.1088	99.6215	99.1143	74.6355	66.2131	88.2364	89.424	91.3596	94.8352	73.4892	90.3322	72.8874	91.5738	88.7489	69.447	80.2413	69.8779	90.2009	78.187	94.9264	88.2151	73.5368									80.7743	72.8779	98.8638	82.1937	68.8816	83.8594	85.2348	94.7132	91.1898	85.2469	78.2143	97.7407
4.8	83.0227	99.4834	75.7057	65.347	67.901	76.3587	78.975	79.188	95.3067	94.3957	74.3888	57.6584	83.0705	89.0968	91.7108	92.5004	73.3229	82.7158	76.2706	91.9032	89.5887	65.8472	78.3702	68.3358	91.8436	74.0349	91.372	88.3541	73.6146									84.9829	78.8521	96.0943	77.2137	64.671	83.1682	88.9293	90.8212	89.0567	88.4274	78.5229	100
4.9333	86.1243	98.7568	72.67	68.2548	67.2676	67.1339	81.6776	80.5074	88.393	90.786	80.0541	54.2711	82.4584	90.6635	87.0933	90.2749	66.4501	79.5614	81.3722	99.0503	91.4261	56.7606	82.6575	68.2092	94.7628	73.7359	90.9523	86.766	70.4699									88.5973	76.0105	92.0678	72.1756	66.8236	81.654	94.777	96.3653	81.3858	84.0678	75.4821	98.5797
5.0667	85.5173	97.3502	68.0243	71.5783	65.8455	63.5414	84.5115	80.6371	81.8648	88.4576	79.3088	52.2077	78.416	87.444	90.9747	90.9048	62.6022	77.6899	89.0075	91.9617	90.6219	48.0875	81.0956	70.2144	100	72.604	92.6513	88.2026	71.0269									84.4612	81.247	93.1696	77.5373	63.3472	79.6709	91.7633	96.3347	76.3154	79.9288	70.3786	96.2483
5.2	86.6073	94.1267	67.9963	70.6607	63.5055	67.5553	81.4694	80.0795	79.3678	84.0148	74.2137	51.63	80.1239	83.9694	86.499	85.4486	62.1333	76.9045	89.4562	94.296	93.8358	46.9856	79.2775	75.4161	90.7175	67.7468	87.0668	91.1231	69.5888									85.5816	72.7727	89.8485	81.8031	65.9647	76.9204	92.3123	93.7261	74.7359	81.9824	69.2105	89.8018
5.3333	100	88.6093	67.1355	74.3957	64.8435	72.9883	74.9102	80.8455	79.7265	86.5492	72.5936	51.4026	80.0599	87.1689	89.0734	80.796	63.6681	75.6553	90.3221	93.6904	98.4538	43.4361	80.3053	76.019	87.5775	71.2728	76.6413	86.4123	67.1428									86.027	77.6176	85.8255	79.6974	66.1916	73.429	93.7465	87.8245	75.1709	80.8767	71.0645	86.0355
5.4667	98.8398	85.448	68.7941	71.1864	61.8904	78.4574	70.3417	77.8544	77.4026	85.3431	68.2242	53.9365	81.4744	84.7939	87.7117	75.6283	66.5098	76.4567	90.3659	90.4443	100	42.4416	77.1057	72.1834	88.8861	69.5173	70.2452	83.7089	65.8429									87.7884	74.7005	76.5726	77.6047	68.0469	73.1115	97.3393	80.7173	77.2073	81.4102	73.7111	87.6096
5.6	96.2932	79.8545	72.5226	70.7822	61.1517	73.0058	72.7201	74.0984	82.0551	85.379	66.1047	57.0805	82.5298	88.4002	85.0205	71.6381	65.172	79.3996	87.8389	90.7138	97.1506	41.2833	77.9492	70.8757	89.1201	74.2253	67.891	83.6316	64.0746									86.8736	79.1815	73.6006	76.5741	70.1627	75.2847	100	77.1098	82.2806	82.6034	69.7133	94.429
5.7333	96.7572	77.9153	75.1188	71.3449	61.9795	71.7534	71.6707	73.6032	84.5209	81.7452	66.3865	58.2926	84.2735	79.6207	82.4996	69.4677	67.2575	79.459	86.4629	88.8111	91.3463	42.7763	81.7117	70.6332	84.5298	78.385	64.9545	84.3182	60.2919									81.9585	76.9461	76.3031	77.3545	70.393	79.2283	97.0545	77.0991	82.2229	81.8947	71.1897	95.1169
5.8667	86.1971	78.5637	77.6243	70.0782	64.8848	63.3894	73.4439	74.3204	88.1012	90.0345	64.9083	62.2297	93.579	81.596	80.9675	68.452	71.3526	82.5494	82.3508	91.9635	92.0245	46.9687	86.8389	70.5176	82.0666	81.954	66.4412	91.9796	60.6085									83.3932	79.789	79.447	84.4865	70.4734	77.9102	95.9961	74.9335	75.8143	82.139	74.7763	97.0057
6	79.0979	75.394	82.6924	68.8666	62.1118	64.227	68.671	74.7499	86.7566	84.9161	63.6137	61.1086	82.7115	80.1885	81.5635	67.8535	72.9839	84.9338	76.0929	94.5133	89.5012	52.1784	85.2119	71.7212	83.6552	78.2502	64.9553	95.4002	62.4011									81.1953	73.0065	69.7554	82.1895	71.0275	79.8942	91.3427	72.6202	75.5455	81.5026	78.8628	94.4026
6.1333	76.2203	73.2068	79.9635	68.1254	62.2657	61.1318	66.0876	76.8903	86.0258	80.2134	58.737	61.8617	80.6809	77.0086	75.4506	63.3413	75.4543	87.8707	71.2503	96.8006	90.1557	57.7458	89.1561	70.1294	87.2429	80.6813	67.4149	99.4212	64.5824									81.1969	80.748	72.9954	84.4063	74.7956	82.4063	91.1959	77.5816	77.0773	75.8447	79.0186	96.3486
6.2667	71.3827	75.996	81.2348	66.9683	61.9994	61.9817	65.6965	79.3414	82.9591	80.6467	61.1902	61.7236	77.2436	81.1301	73.851	62.146	73.2283	90.3857	74.5455	97.3966	97.0159	67.5145	93.5225	71.2891	87.0584	79.4404	71.7961	100	69.8565									78.6287	72.6882	69.5376	83.3833	74.2806	82.6964	91.347	79.7382	77.7177	73.5689	88.1484	94.0419
6.4	70.7694	77.2108	77.2891	63.8682	63.7595	59.1026	63.5819	84.5231	84.493	84.7595	62.1129	55.5775	74.6371	87.7487	75.3244	61.2702	68.6214	94.5932	75.1222	98.4558	93.802	65.6594	94.27	70.8944	82.4843	74.1457	72.3076	95.2449	70.8719									81.8781	72.9126	66.8411	81.8468	71.6887	81.7042	87.0281	83.6472	75.4911	71.8467	92.024	91.9323
6.5333	69.6033	78.6182	76.4199	64.2521	64.4571	61.1006	63.8124	87.5076	83.9113	87.2881	62.8463	55.4486	75.6738	90.4165	73.5149	56.9064	66.2909	100	75.2833	95.6095	88.3736	62.912	100	69.5283	77.0878	70.9851	65.2459	86.7849	67.7975									78.6182	70.0518	68.7004	78.0759	75.9421	84.3981	82.5909	84.683	74.5717	69.8343	95.4713	97.9128
6.6667	70.3088	76.9128	76.7998	65.3304	65.8992	63.2148	62.8248	89.2602	85.3503	92.2089	65.9339	50.5193	67.468	91.6203	76.1495	51.9589	65.9043	98.1207	74.7216	93.6913	83.9411	60.2424	99.3864	70.5291	75.6108	71.627	61.1952	78.6196	67.9215									81.8163	72.1273	65.671	79.7879	81.9348	85.5699	85.9063	87.9591	83.3582	71.8337	97.4495	98.252
6.8	78.8898	75.9497	78.266	67.779	62.6628	71.5261	59.2466	95.1266	84.7992	88.5682	64.0824	45.305	61.2	92.8144	83.3457	49.2161	67.6367	92.8181	75.9249	89.9328	78.0835	56.9643	92.0126	71.0367	71.9787	68.5873	60.8071	74.1393	68.0478									86.4327	74.9873	57.8797	79.0154	79.7669	84.194	80.6642	94.0695	94.9219	72.9817	98.9381	94.883
6.9333	75.3582	67.3827	83.3209	72.9343	64.8641	76.5349	57.2825	100	87.7033	91.6434	61.8249	45.3851	62.5448	93.273	85.2802	46.7064	77.7862	89.4423	76.2419	93.4967	71.4881	53.0987	86.4342	70.2151	72.215	66.5301	58.3005	65.1814	69.1327									87.9306	80.6683	52.6553	78.9975	83.9068	87.3347	84.4192	96.662	98.5605	68.5857	99.6753	94.2985
7.0667	79.4416	65.2432	89.625	77.2253	68.5018	83.1341	57.1366	93.6938	84.3686	90.3989	61.6732	46.7525	59.0772	88.6688	89.9395	46.7783	79.9952	91.049	72.575	94.5909	73.1895	50.5523	84.5367	71.6282	74.5149	65.8633	62.9362	54.5725	70.1174									90.1263	85.6926	54.2931	86.4673	84.0534	87.7222	80.1206	99.5161	100	68.6591	100	98.7387
7.2	76.7996	61.1947	91.1503	80.1774	66.9201	88.6092	55.9354	91.471	79.4113	88.7693	62.3492	47.6032	57.7938	84.9358	82.5726	49.6562	83.8195	88.2724	67.1805	95.7386	71.7667	44.7622	87.0987	65.2459	78.2211	64.3695	61.7242	51.1889	69.8435									95.8353	90.2746	54.7053	89.5776	81.3955	87.4541	83.4183	100	94.8494	70.7543	97.1587	96.3339
7.3333	74.8808	65.3815	90.8594	79.3253	65.7711	86.4738	56.1073	88.6926	74.7373	87.6965	62.0598	52.068	62.2758	84.045	82.1705	49.7798	83.1247	85.3043	64.42	100	70.3541	40.6825	79.6406	65.7407	77.843	63.6713	64.0603	42.3837	70.5571									100	92.943	55.1909	95.6172	82.3074	88.6473	83.2216	96.7755	92.8432	71.8971	94.4316	91.6524
7.4667	72.653	66.2785	91.9243	78.1202	64.5421	87.3981	51.73	88.229	76.2193	88.0268	60.5006	58.647	66.9562	84.0174	83.8476	48.0655	85.4832	82.5355	62.7637	99.3592	70.0834	46.8254	75.0098	66.2016	82.7603	69.2213	67.094	37.769	70.3399									98.1323	97.4815	51.3212	100	81.1366	82.2831	79.7311	91.0391	92.0836	73.9402	94.6762	86.6599
7.6	73.7316	73.1004	93.8241	77.1995	68.1255	88.5941	47.705	92.4403	74.7685	83.692	61.4272	64.5639	75.2888	79.3311	82.0555	43.3271	85.9395	75.1694	64.111	93.47	67.2044	49.5485	73.5273	66.8532	83.6694	67.7309	61.5754	34.5215	71.4148									98.9513	96.3823	50.4838	98.5278	80.726	82.4248	77.3181	92.3607	92.616	76.3077	96.7261	84.1399
7.7333	73.7551	77.3739	89.4515	79.5682	67.721	90.6851	45.7887	99.1054	74.2919	83.1273	64.1095	71.1159	78.6366	84.7035	84.5721	45.8349	86.9668	78.7193	53.8944	95.5476	63.772	57.6414	72.5154	69.8018	84.7597	70.9565	68.1118	31.9048	71.7191									98.1605	100	48.539	96.3042	84.0748	83.413	78.323	88.6935	91.1612	79.6987	99.8077	79.256
7.8667	71.5112	78.8517	86.6277	79.664	71.4898	92.019	45.4532	97.2595	71.6102	82.6949	63.3957	72.896	82.2731	84.121	90.9146	45.7354	88.3117	77.0432	51.6742	94.7134	64.5488	62.2212	67.5388	75.3868	87.9685	74.8131	66.3579	30.7254	71.1902									91.5678	88.7471	47.8081	91.4306	87.0166	85.7582	76.0237	82.6718	92.1755	81.9601	98.6047	77.236
8	65.7305	83.8977	84.6916	77.2468	68.244	93.8268	41.2999	94.8101	71.2844	81.5979	62.7036	75.3051	86.957	82.4647	94.1535	44.743	84.2323	79.1815	49.1218	93.7685	56.4249	68.4107	69.5563	82.4706	90.6855	72.9721	64.8272	29.0815	70.194									98.4383	80.9634	51.3829	88.7766	92.228	88.6502	78.5351	85.5927	88.9189	81.2611	94.5915	70.1794
8.1333	64.4936	85.7629	86.4249	74.741	68.2647	94.5495	43.5354	87.1477	70.7241	82.5337	63.1782	71.1438	90.1993	82.2528	97.7197	42.6731	83.6608	75.5725	47.1172	92.3172	56.3209	74.4851	64.9181	91.7901	92.2634	74.3994	63.5635	28.3484	68.3937									96.9848	73.3383	49.0084	86.9009	99.6379	86.3108	80.7301	80.4833	92.5867	83.0387	94.7134	64.6933
8.2667	63.8938	85.2333	88.4618	72.6404	70.4582	96.412	42.5828	85.7549	69.2909	83.5227	68.3816	69.1295	91.374	84.7461	100	44.4516	87.4399	70.5407	48.9664	89.0231	57.5348	69.8685	62.967	93.231	98.7096	76.5625	60.902	27.1365	66.505									87.5276	70.1446	42.5992	84.5491	100	83.6939	77.3482	83.8578	86.4724	86.8827	94.7379	60.5941
8.4	63.0384	80.9043	87.1815	69.4636	67.6257	98.9446	41.5815	88.8647	71.0222	90.9573	70.2141	71.4271	97.1046	88.5205	96.29	46.2098	97.8495	68.8759	49.9635	84.8709	59.5047	67.0702	60.5746	94.3538	97.7566	73.5417	60.2783	23.1209	65.3679									78.2234	68.1007	36.3228	82.9326	93.4345	85.8325	74.3224	83.2159	86.6483	83.4594	95.384	60.2965
8.5333	57.6953	72.1586	87.5553	69.9592	67.0022	98.2672	43.9211	92.4867	71.7459	91.0329	69.5449	69.2964	96.4953	89.7298	94.7672	48.7645	91.267	67.7877	52.3798	85.4724	61.1296	56.0847	59.2671	90.5857	96.188	68.4965	56.9549	20.3512	66.8818									72.5775	68.351	30.538	81.6392	82.5103	86.4304	74.8596	82.5489	76.9612	86.9096	94.8548	59.431
8.6667	57.9929	67.5022	83.8282	71.4018	67.9023	97.1204	44.5345	90.9762	75.9294	94.9513	71.2515	66.92	100	94.1455	89.7777	54.7716	94.0048	70.4352	56.9949	86.2343	63.2131	43.2469	64.7552	89.026	95.6507	64.2745	63.8798	19.439	67.9133									69.9737	61.8116	25.8696	77.4267	69.7004	85.0282	76.9984	79.0136	66.4163	84.0705	95.2566	56.3295
8.8	56.5631	65.3987	83.8311	70.4035	67.4927	92.1486	50.1473	88.8775	78.4968	92.3945	67.5608	63.3271	92.6994	89.134	86.9347	56.5929	94.7714	70.1731	54.5403	91.023	63.8434	35.5654	56.771	87.5988	94.329	68.507	67.9026	17.7711	67.564									69.3064	63.2504	25.7611	82.2883	62.9078	87.5918	79.0569	77.7823	59.4814	82.7066	95.6041	55.8337
8.9333	52.9659	64.6682	92.3148	74.8928	74.3855	87.9042	51.4934	82.5267	82.0013	94.5763	64.318	59.3378	95.7133	91.6823	85.7752	57.2289	95.8215	72.3689	58.8012	86.1325	63.8415	32.4598	53.9398	85.8499	94.3147	63.0027	69.8185	16.6473	70.1774									74.0046	67.9144	27.773	82.8801	57.5097	90.1865	81.4344	75.3541	62.7177	76.2304	95.0307	57.292
9.0667	50.3777	66.8438	86.6768	78.4531	70.3026	79.2216	54.7072	80.3443	84.5848	98.583	57.6004	56.1433	93.9217	93.5009	87.7539	55.3392	90.4254	69.9332	62.9689	90.2742	64.4488	33.4439	55.3086	87.0297	89.8993	58.6609	70.846	17.0709	71.5513									73.1603	66.8389	29.0471	86.7613	57.4454	84.0084	77.4024	70.1869	63.6749	80.2013	94.7372	59.1733
9.2	52.2036	68.2472	86.8209	78.5497	71.7587	70.3244	51.7956	84.4996	85.5432	97.7491	57.138	51.5551	88.1162	95.9239	83.5574	52.5631	89.1607	68.9025	64.8518	93.552	63.1982	31.2234	53.2601	87.4123	90.2487	55.5684	68.588	16.336	70.6958									69.845	68.5301	30.6	89.3857	63.5683	87.2784	77.2612	68.0426	65.0414	81.8334	94.8882	58.7154
9.3333	48.9215	69.1892	88.303	80.2676	72.0037	58.6867	53.1969	86.6469	86.493	100	58.1602	54.3448	91.7131	97.1338	81.402	54.0572	84.8072	66.0932	65.168	96.3244	64.4718	30.3572	50.6169	84.9739	85.9665	53.5681	71.0808	15.9378	67.9882									63.8926	69.5577	32.7831	84.9685	64.172	89.5959	74.5074	68.7057	65.1641	70.8974	95.0397	59.1584
9.4667	47.9235	72.26	85.8161	84.3176	70.121	50.3166	52.1488	88.8995	94.5463	99.9779	57.1307	58.1657	85.2452	97.7461	80.6981	60.461	82.7783	62.9624	63.1447	99.5905	63.3188	29.0011	55.3216	86.6765	81.9028	52.3924	73.8401	15.8354	66.0056									67.3335	67.4003	32.5779	84.6494	68.6347	84.9957	73.5318	64.215	68.7418	76.4126	90.62	58.8945
9.6	47.6988	79.9525	73.2165	87.7936	68.1247	45.7469	53.479	87.2698	90.3548	98.7313	58.453	67.4337	83.1653	100	83.7426	62.3504	85.8063	68.2562	64.4565	97.0447	64.6254	27.9793	62.9513	90.4845	83.99	54.6341	74.4798	16.2032	61.2002									61.3116	73.6477	27.5276	86.2409	70.6907	82.8206	73.3956	63.1342	69.1821	72.0116	92.6651	58.5732
9.7333	47.5235	81.8208	69.061	89.4159	64.5663	40.9438	57.8946	85.4507	93.3616	95.9242	64.0108	68.3075	82.0022	97.0484	84.8613	63.6502	86.6938	67.8625	65.2247	94.0405	64.6656	25.5335	64.8853	92.7775	87.1035	52.4762	75.8366	18.6455	57.1395									61.8315	73.9214	29.0664	86.3319	69.2291	84.452	73.8186	67.5755	71.6495	74.2337	93.2503	58.6283
9.8667	48.9662	83.5694	72.6698	87.5685	64.7724	40.0979	59.0142	88.7593	99.6427	94.1171	65.4548	70.2195	80.8946	88.0199	85.8144	67.2851	91.0537	69.8457	65.4396	88.7686	62.978	27.6461		98.0054	85.7457	53.8057	77.2231	18.7429	58.4835									59.0029	70.8771	31.3199	90.2515	74.7068	87.9432	76.5346	71.4931	69.0521	67.8215	94.5376	56.3919
10	52.6295	83.5983	65.7587	87.3836	66.1795	37.7407	58.357	87.0265	100	95.7075	70.2554	71.0371	78.855	92.0595	81.3695	70.8922	92.7769	66.7323	62.2926	93.0432	58.2193	29.6409			90.045	51.9766	78.6192	18.7792	60.5772									59.2638	70.1352	27.3038	99.8387	74.1744	92.1293	80.1133	75.1485	71.4023	70.5446	96.008	55.4629
[truncated: 56 more columns]

## Sheet: Figure 7C
Cilia Width					Cilia Length
wild type	tub-1	dpy-23(e840)	tub-1; dpy-23		wild type	tub-1	dpy-23(e840)	tub-1; dpy-23
2.27	1.03	1.65	0.95		12.92	4.1	9.7	5.63
1.2	1.02	2.47	0.95		14.35	2.38	8.34	5
1.17	1.1	1.49	1.6		13.19	3.06	9.28	6.38
1.08	1.15	3.07	0.86		11.99	3.12	9.32	4.82
0.98	0.78	0.95	0.96		11.33	1.74	8.58	5.78
1.08	0.96	1.06	1.23		12.25	2.75	19.44	6.35
1.42	0.95	1.05	1.26		11.26	6.16	11.03	5.17
1.34	1.48	2.12	0.96		11.71	5	10.21	5.52
2.36	0.95	0.68	1.26		9.5	4.07	11.83	6.09
1.46	0.75	2.73	1.38		12.08	3.43	8.22	4.51
1.33	0.84	1.9	1.23		9.32	6.15	13.36	5.9
2.01	0.95	4.01	0.86		9.75	5.87	12.35	3.14
1.27	0.7	1.34	1.56		9.97	2.84	10.93	3.58
2.65	0.82	1.13	1.05		9.25	3.08	8.63	3.5
1.34	0.8	2	1.22		9.3	2.59	11.65	4.73
2.73	1.05	2.29	1.26		11.34	4.56	11.29	4.08
1.78	0.91	2.47	1.09		10.49	2.57	8.64	2.78
0.97	1.02	4.37	1.35		9.73	4.1	8.77	4.04
3.01	1.08	1.5	1.44		13.43	6.18	8.03	5.1
0.98	1.01	2.29	1.05		8.78	2.12	7.14	3.64
2.26	1.36	2.56	1.08		12.81	3.8	11.34	3.88
2.83	1.34	1.31	1.17		13.68	3.85	12.17	3.22
0.85	0.95	1.97	1.31		9.73	2.26	8.26	4.11
2.33	1.14	2.55	1.54		10.46	3.88	8.91	5.16
1.41	0.93	1.75	1.59		14.8	5.34	10.24	5.29
0.78	0.95	1.62	1.34		9.65	2.79	5.47	4.43
0.84	1.1	2.62	0.95		13.97	3.55	7.46	4.44
1.07	0.98	2.3	1.53		9.92	2.38	12.07	3.55
1.25	0.93	1.57	1.32		10.87	5.29	7.59	3.58
1.08	1.19	1.25	1.18		9.08	5.39	11.57	6.69
1.64	1.17	1.22	1.31		11.85	4.1	9.89	4.51
			1.27					3.1

## Sheet: Figure 7D
Length of enrichment			TUB-1 fluorescence in cilia
wt	dpy-23(e840)		wild type	dpy-23(e840)
1.76	3.49		71.2257	122.896
1.96	3.46		45.4977	244.054
1.79	2.92		171.627	73.172
2	3.21		60.941	117.018
2.07	3.98		172.794	270.355
2.17	2.29		72.1037	220.089
1.65	2.39		213.009	161.704
1.54	2.36		316.593	63.068
1.1	2.13		1039.86	161.052
1.71	6.19		161.198	126.632
2.4	2.88		80.1697	190.593
1.96	3.21		48.1107	208.525
1.37	2.48		585.456	115.274
1.88	2.56		227.824	126.696
1.9	2.06		139.066	311.234
1.37	4.01		148.36	66.3273
2.73	3.79		101.251	167.569
2.3	2.25		72.944	15.2947
1.59	3.84		131.724	47.3067
1.98	4.57		274.911	93.6117
2.04	2.99		127.552	139.776
1.86	4.44		48.661	74.43
1.72	3.76		112.388	68.9533
1.76	2.63		96.2493	225.105
2.8	3.22		80.6413	78.3203
2.34	2.32		12.6623	144.518
2.34	3.66		71.8263	91.278
1.61	2.92		176.988	120.055
2.2	3.24		135.163	75.018
1.95	3.03		131.171	87.8133
1.51	3.56		272.79	344.139
1.42	3.07		785.723	43.1083
2.41	3.69		122.27	378.622
2.51	1.67		110.212	80.4787
1.6	3.07		412.449	394.572
2.14	3.91		94.4487	225.888
1.74	4.54		221.962	250.848
	0.85			620.283

## Sheet: Figure 7S-1A
wild type	tub-1(nr2004)
148.469	2.07767
1.392	0.468333
392.387	85.6523
96.348	18.0573
176.971	189.647
35.725	97.8603
1138.23	54.879
374.497	108.725
293.859	48.4687
63.1063	36.3863
75.3287	528.802
61.9227	243.484
35.3523	1.642
532.353	17.6137
22.633	75.3863
594.71	1.13033
6.70533	81.517
-8.19767	1088.1
162.599	4.908
403.831	156.034
160.068	45.6763
45.372	7.696
157.136	251.647
24.1643	35.5453
113.546	103.458
171.194	126.667
-2.63233	530.497
74.9513	63.681
98.5263	236.193
-2.75333	101.339
242.439	197.512
62.9423	126.469
36.6327	236.72
246.831	145.855
24.242	203.879
130.72	0.700667
65.4827	212.961
146.507	35.6617
-2.29	87.4403
127.439	35.246
33.3963	396.309
22.9033	-1.111
-1.024	146.72
12.082	123.759
0.295333	14.72
152.077	6.83533
110.778	-1.89867
-7.59433	11.773
520.053	327.319
76.1057	873.178
61.2803	228.338
	10.7877
	21.483
	52.2657
	12.024
	14.9853
	167.343
	-10.8497
	95.3243
	0.135
	14.662
	3.07767

## Sheet: Figure 7S-1B
wild type	tub-1(nr2004)
66.9707	-2.82067
49.372	29.2657
37.493	66.4493
86.889	1.995
19.015	104.198
32.1493	6.86033
27.3667	124.077
65.778	89.5077
56.565	53.8837
101.661	11.2847
29.8553	13.5123
82.4537	10.493
15.8313	110.865
20.8023	31.073
18.947	41.5213
45.039	33.8793
46.097	46.0287
37.9377	89.2903
97.8697	5.16467
73.788	18.5413
185.502	75.84
17.8113	23.0873
-1.816	62.0963
73.1597	7.57033
30.1207	42.2033
56.4977	46.483
3.05267	36.8067
24.8793	32.2223
58.3357	42.6323
112.135	91.99
9.106	3.42033
52.2413	57.7147
103.73	59.3527
26.096	13.551
10.169	23.1203
58.242	77.28
17.72	30.715
160.256	22.9857
21.6953	0.874667
8.21767	7.783
26.2853	2.33833
25.4543	2.84567
5.74367	4.80233
16.884	-0.154667
4.04333	33.0577
12.5263	10.8217
3.04833	11.5317
1.35767	47.5943
9.02933	16.5313
28.7297	3.70067
19.488	7.75833
-2.353	48.7393
26.618	0.396
9.33367	3.11167
	27.4153
	145.903
	3.02933
	-3.913
	18.744
	19.092
	38.1157
	3.74367

## Sheet: Figure 7S-1C
wild type	tub-1(nr2004)
167.913	7.947
-1.14033	773.42
-3.90867	-0.0866667
1.93733	2.097
112.942	9.98033
-0.821667	427.348
1.58933	263.913
541.193	123.304
10.5893	159.657
4.319	1010.53
-0.604	-3.45433
0.439333	-2.918
124.613	1.60333
5.92233	650.348
-5.99067	29.2033
-0.328333	-4.879
51.705	-3.35767
3.908	368.372
91.2123	-10.2313
1.686	2.54167
60.8307	355.633
42.2223	76.8937
-5.37633	258.58
40.56	-0.937333
8.34733	1239.39
54.957	18.266
5.85533	3.377
-0.005	664.531
1.13067	36.7973
16.1883	0.121
6.32867	241.14
620.42	199.981
547.652	-0.986
2488.46	711.985
17.2083	1934.78
-8.26067	1112.61
111.58	472.836
682.493	13.464
-4.66667	113.459
154.594	287.074
7.28533	134.903
550.044	1811.59
5.99	269.821
300.531	92.6763
395.874	1554.54
491.812	248.797
32.6427	629.29
35.2517	1606.68
-0.501667	17.9663
54.763	93.43
137.478	-2.918
147.261	1.60333
7.048	650.348
	29.2033
	-4.879
	-3.35767
	2.09667
	-2.358
	691.492
	-3.58467
	1026.19
	-11.005
	142.323
	-1.32367
	-9.89833
	42.275
	-7.28933
