# Supplementary figures and images for: The Caenorhabditis elegans Tubby homolog dynamically modulates olfactory cilia membrane morphogenesis and phospholipid composition
Source: eLife journal article supplement (doi:10.7554/elife.48789), 2019-07-01

**A**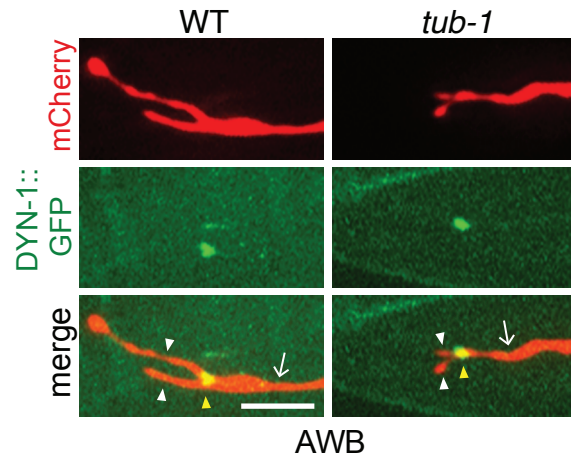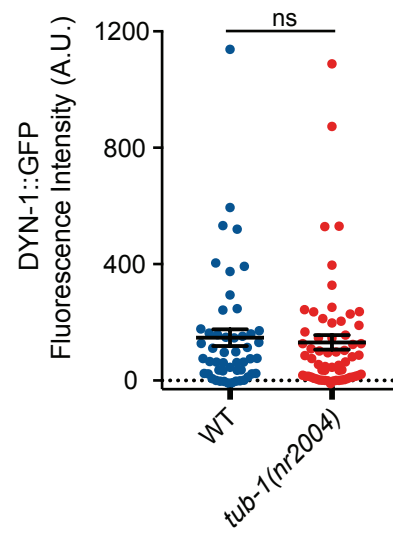**B**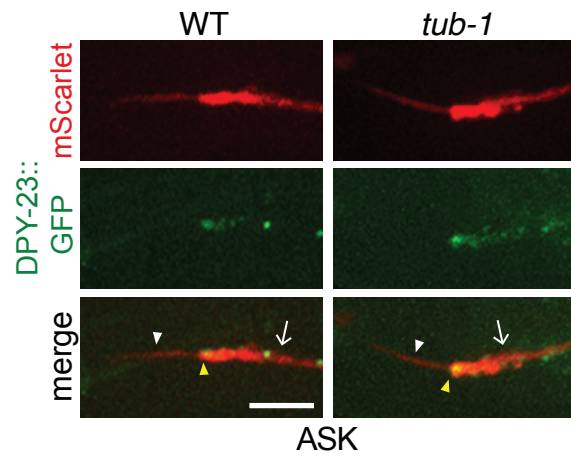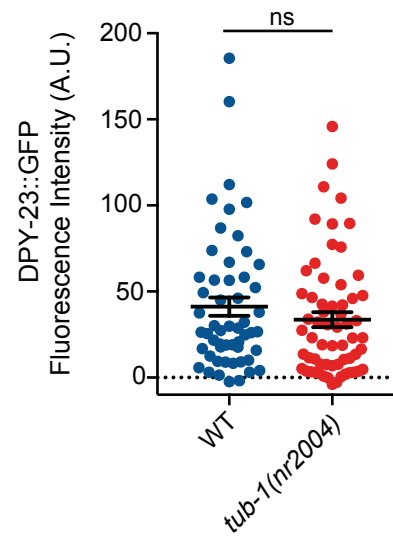**C**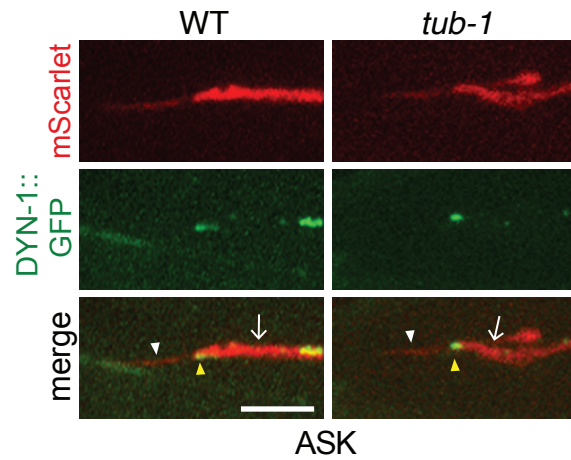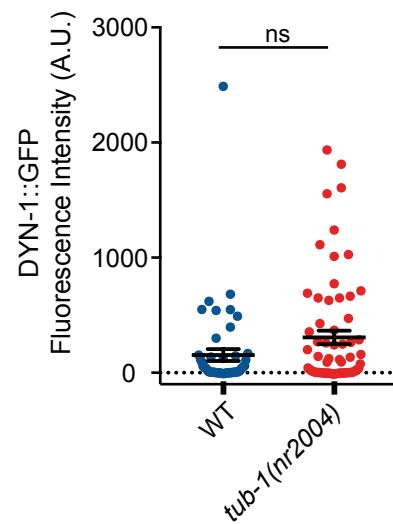

Supplement: supp [file elife-48789-supp-v1.zip]

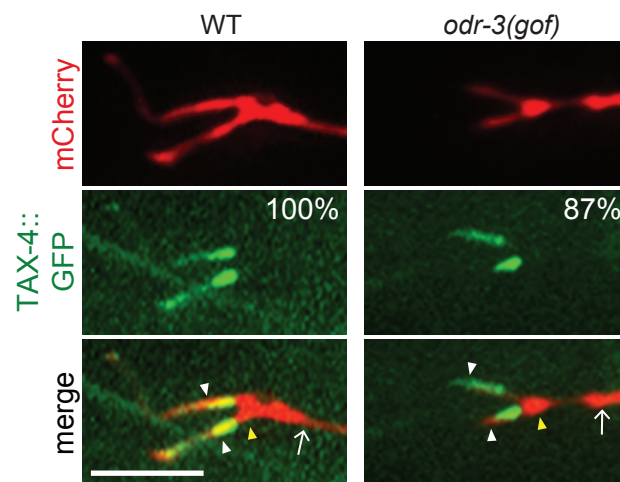

DiTirro, Philbrook et al., Figure 2 - figure supplement 1

Supplement: supp [file elife-48789-supp-v1.zip]

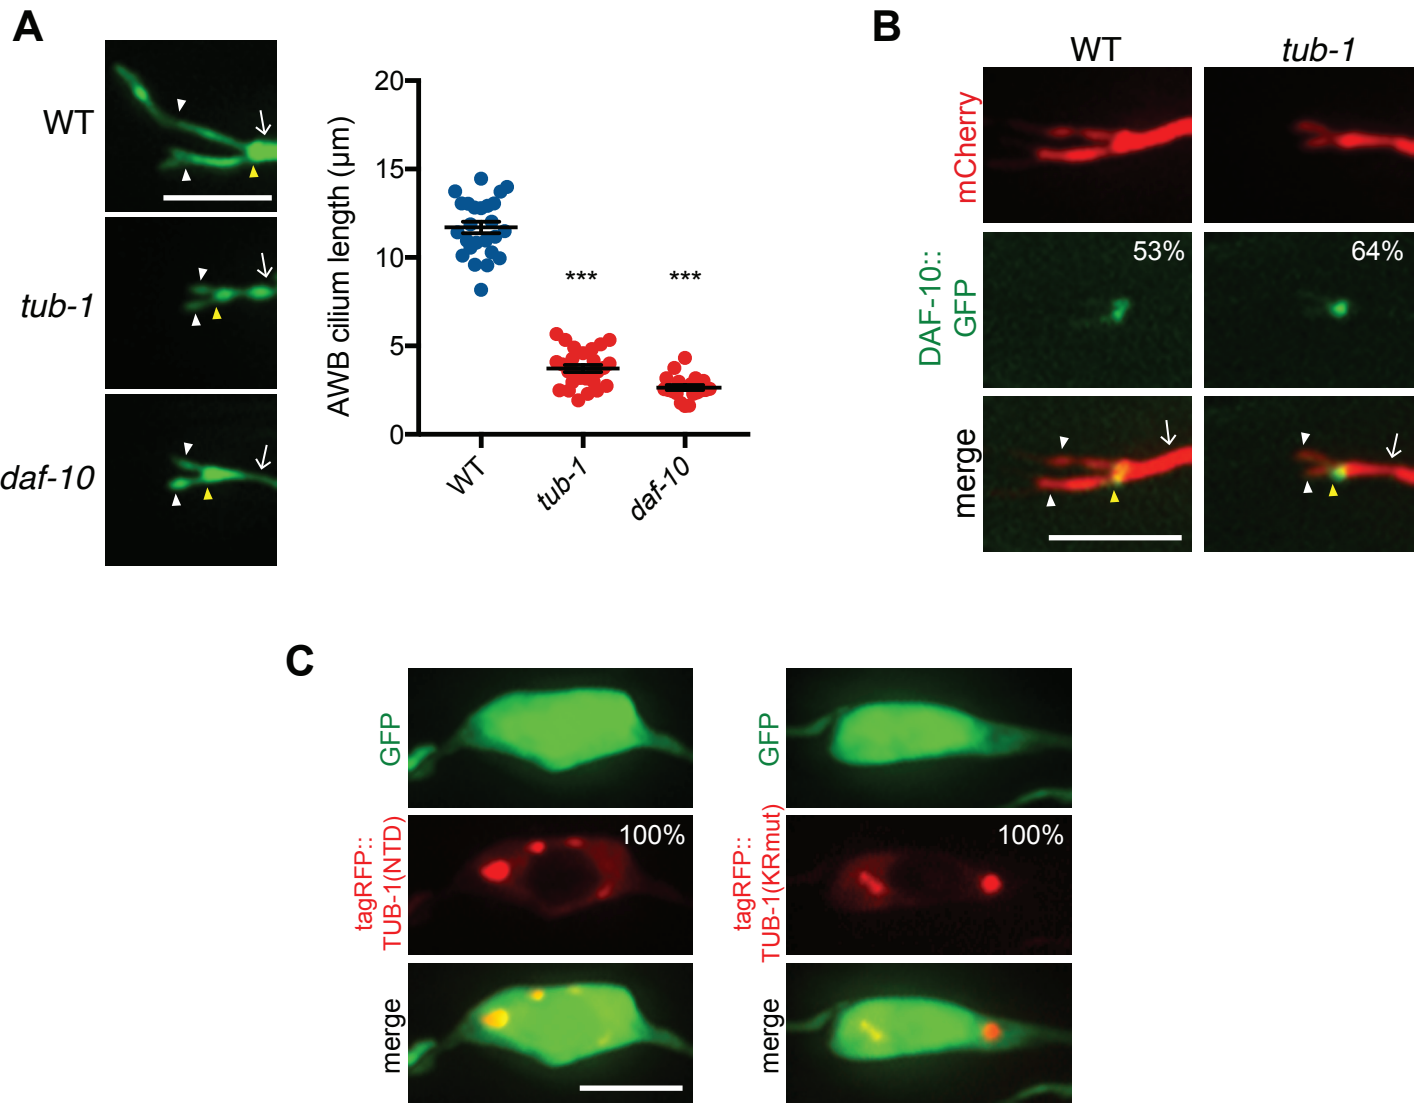

DiTirro, Philbrook et al., Figure 3 - figure supplement 1

Supplement: supp [file elife-48789-supp-v1.zip]

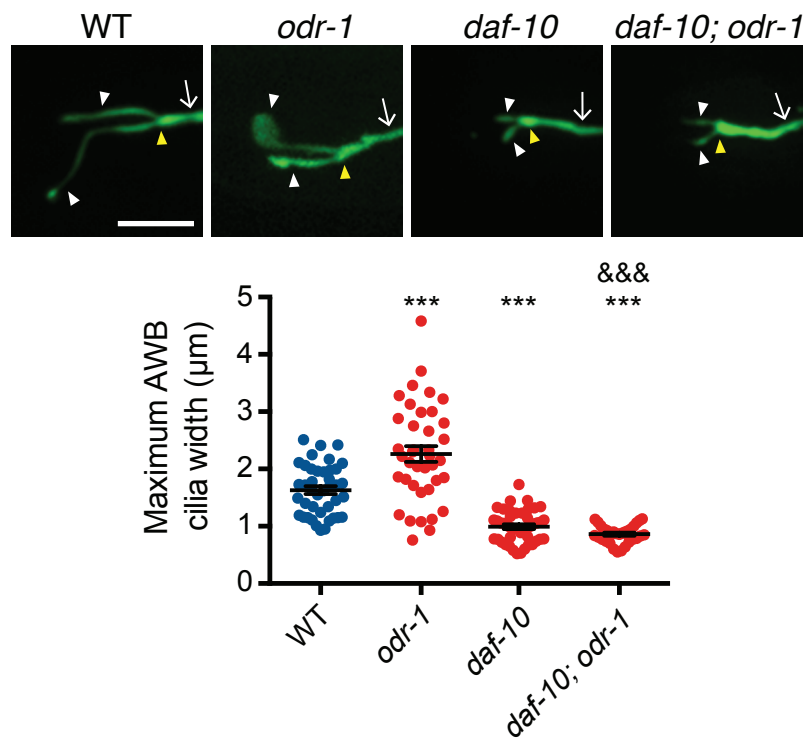

DiTirro, Philbrook et al., Figure 4 - figure supplement 1

Supplement: supp [file elife-48789-supp-v1.zip]

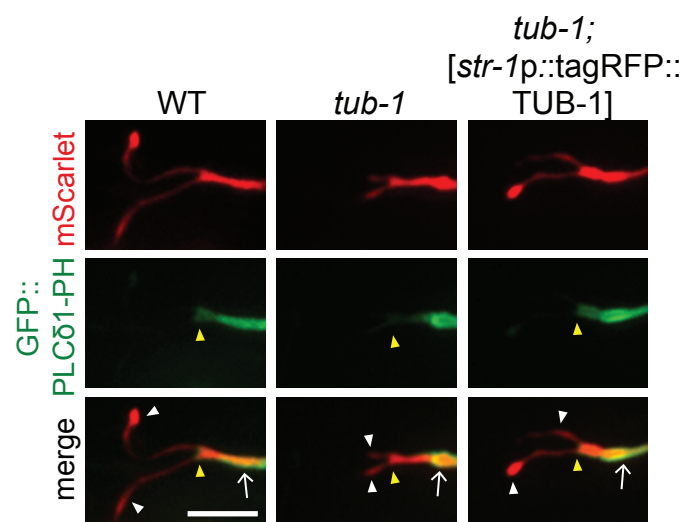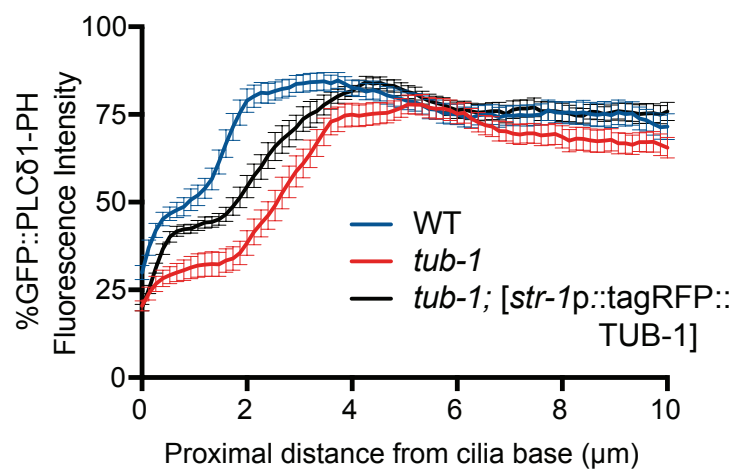

DiTirro, Philbrook et al., Figure 6 - figure supplement 1

Supplement: supp [file elife-48789-supp-v1.zip]

**A**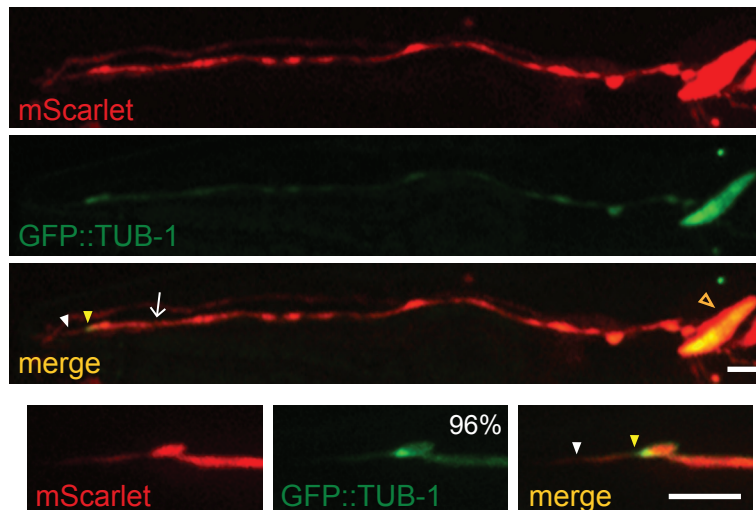**B**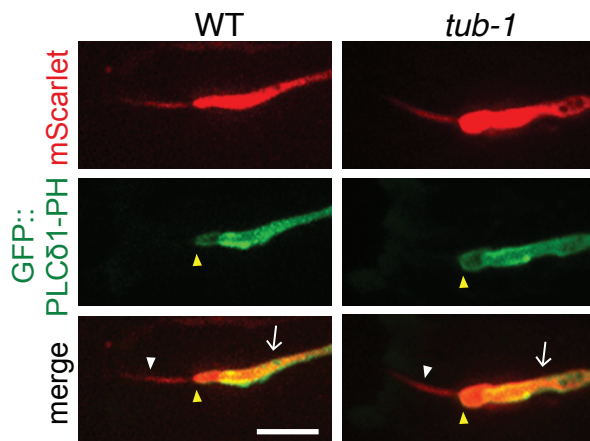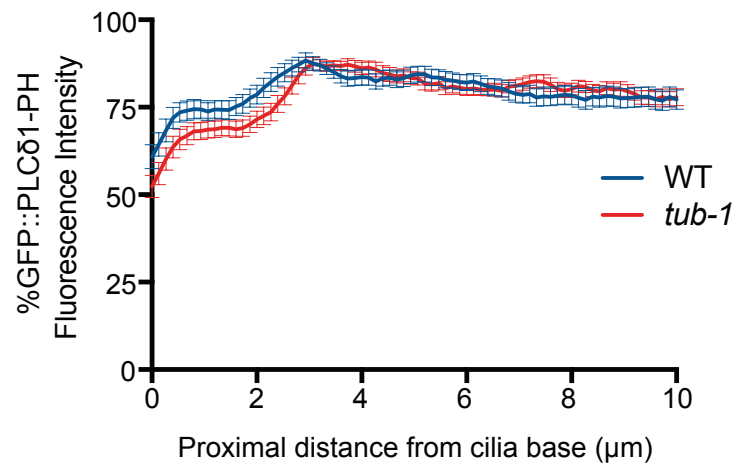**C**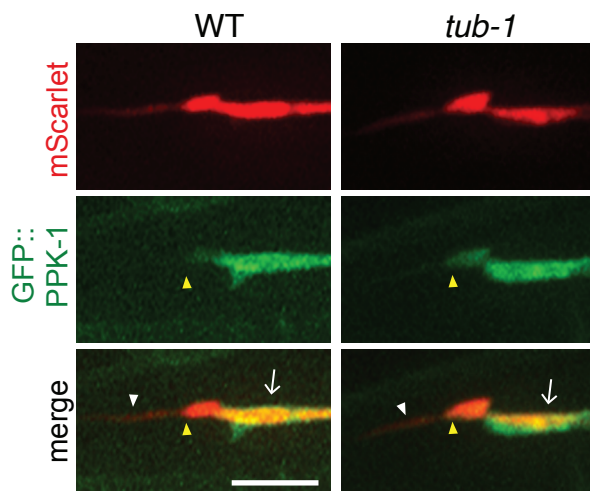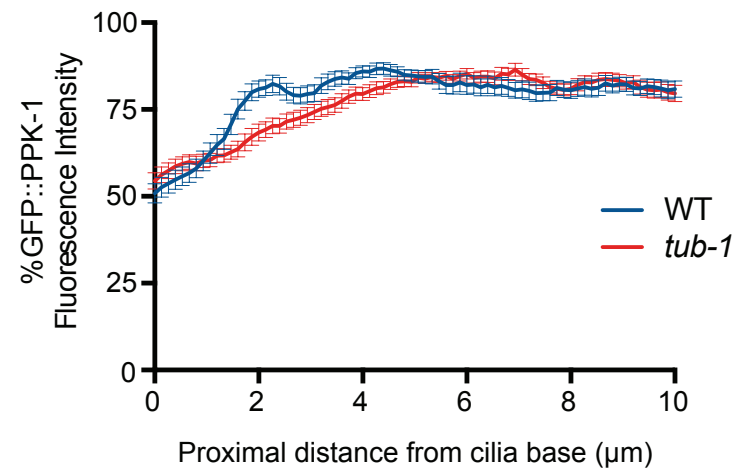

Supplement: supp [file elife-48789-supp-v1.zip]

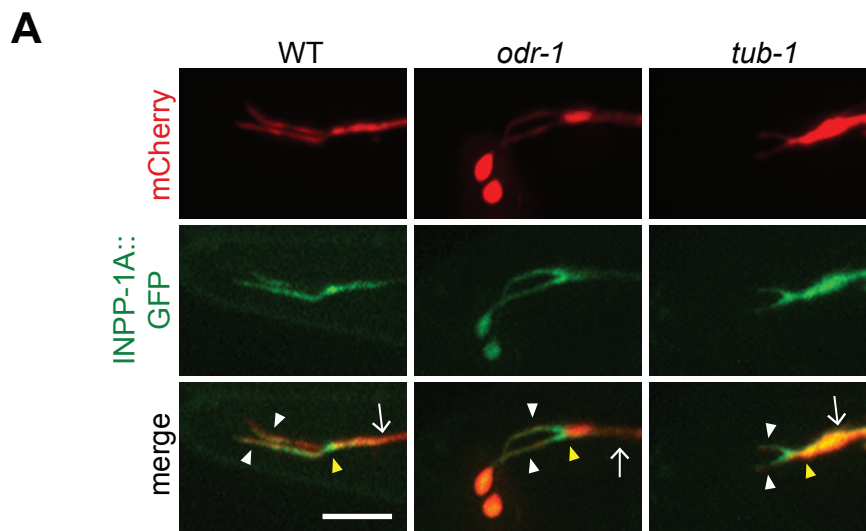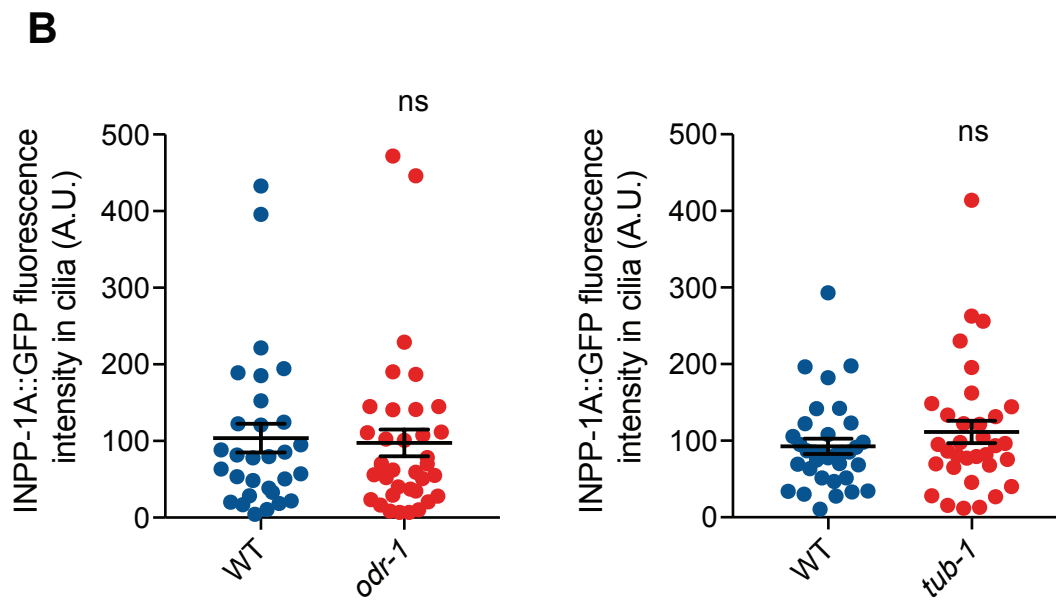

Supplement: supp [file elife-48789-supp-v1.zip]

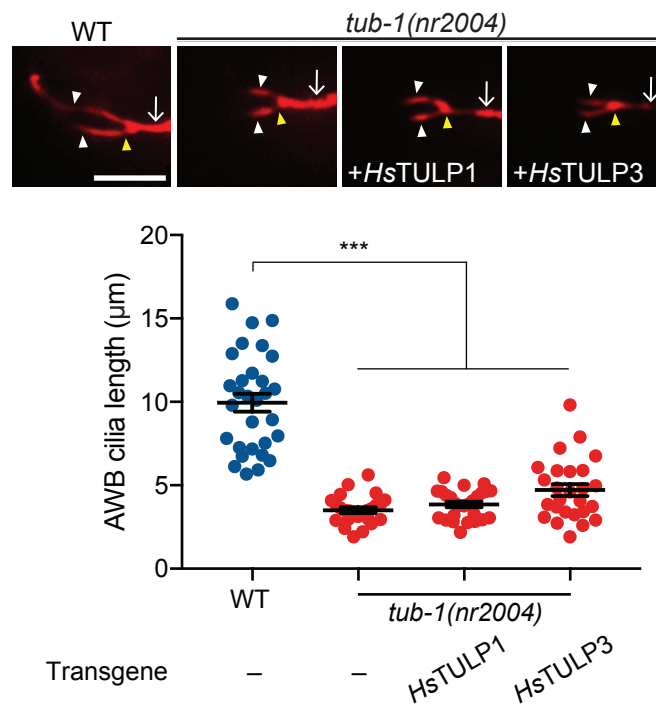

DiTirro, Philbrook et al., Figure 1 - figure supplement 1

Supplement: supp [file elife-48789-supp-v1.zip]
